# Supplementary material
Source: publisher figshare collection journal article supplement (https://acs.figshare.com/ndownloader/files/5302621)
Supplement: Supplementary file 1 [file 5302621]

*Supporting Information*

***A Dynamic Kinetic C–P Cross–Coupling for the Asymmetric Synthesis of Axially***

***Chiral P,N Ligands***

*Pedro Ramírez-López,<sup>§</sup> Abel Ros, <sup>\*,§</sup> Beatriz Estepa, Rosario Fernández, <sup>\*,§</sup> Béla Fiser, <sup>‡</sup>*

*Enrique Gómez-Bengoa, <sup>\*,‡</sup> José M. Lassaletta <sup>\*,§</sup>*

<sup>§</sup> Instituto Investigaciones Químicas (CSIC-US), C/ Américo Vespucio, 49, 41092 Sevilla, Spain.

<sup>‡</sup> Departamento de Química Orgánica, C/ Prof. García González, 1, 41012 Sevilla, Spain

<sup>‡</sup> Departamento de Química Orgánica I, Universidad del País Vasco, UPV/EHU, Apdo. 1072, 20080 San Sebastián, Spain

E-mail: abel.ros@iiq.csic.es, jmlassa@iiq.csic.es, ffernand@us.es, enrique.gomez@ehu.es

|                                                                                                     |                |
|-----------------------------------------------------------------------------------------------------|----------------|
| <b>Table of contents</b>                                                                            | <b>page</b>    |
| <b>General Information:</b>                                                                         | <b>S2</b>      |
| <b>1-(2-methoxynaphthalen-1-yl)phthalazine:</b>                                                     | <b>S2-S3</b>   |
| <b>1-(phthalazin-1-yl)naphthalen-2-ol:</b>                                                          | <b>S3</b>      |
| <b>Synthesis of triflates (±)-1D and (±)-9. General procedure.</b>                                  | <b>S4</b>      |
| <b>Characterization of (±)-1D and (±)-9:</b>                                                        | <b>S4-S5</b>   |
| <b>Synthesis of Nonaflates (±)-8C-D and (±)-11. General procedure.</b>                              | <b>S5-S6</b>   |
| <b>Characterization of (±)-8C-D and (±)-11:</b>                                                     | <b>S5-S6</b>   |
| <b>Synthesis of Silylphosphines 5a-e. General procedure:</b>                                        | <b>S6</b>      |
| <b>Characterization of 5a-e:</b>                                                                    | <b>S7-S8</b>   |
| <b>Screening of Josiphos ligands and solvents using <i>t</i>-BuMe<sub>2</sub>SiPPh<sub>2</sub>:</b> | <b>S8-S10</b>  |
| <b>Dynamic Kinetic Asymmetric C-P Cross–Coupling. General procedure:</b>                            | <b>S11</b>     |
| <b>Characterization of products 3Aa-Ce:</b>                                                         | <b>S11-S21</b> |
| <b>Experiments with Triflate 9 and Nonaflate 11:</b>                                                | <b>S22</b>     |
| <b><sup>1</sup>H, <sup>13</sup>C, <sup>31</sup>P, <sup>19</sup>F NMR spectra and HPLC traces:</b>   | <b>S23–S80</b> |
| <b>References</b>                                                                                   | <b>S75</b>     |

## General Information.

$^1\text{H}$  NMR spectra were recorded at 300 MHz, 400 MHz or 500 MHz;  $^{13}\text{C}$  NMR spectra were recorded at 75 MHz, 100 MHz or 125 MHz with the solvent peak used as the internal reference (7.26 and 77.0 ppm for  $^1\text{H}$  and  $^{13}\text{C}$  respectively for  $\text{CDCl}_3$ ; 5.32 and 53.8 ppm for  $^1\text{H}$  and  $^{13}\text{C}$  respectively for  $\text{CD}_2\text{Cl}_2$ ; 7.16 and 128.1 ppm for  $^1\text{H}$  and  $^{13}\text{C}$  respectively for  $\text{C}_6\text{D}_6$ ); Column chromatography was performed on silica gel (Merck Kieselgel 60). Analytical TLC was performed on aluminum backed plates ( $1.5 \times 5$  cm) pre-coated (0.25 mm) with silica gel (Merck, Silica Gel 60 F<sub>254</sub>). Compounds were visualized by exposure to UV light or by dipping the plates in a solution of 5%  $(\text{NH}_4)_2\text{Mo}_7\text{O}_{24} \cdot 4 \text{H}_2\text{O}$  in 95% EtOH (w/v) or followed by heating.

The silylphosphines used in this paper are moisture-sensitive compounds, and were stored in a nitrogen-filled glovebox and manipulated in flame-dried glassware using standard Schlenk techniques. Purging refers to an evacuation/argon refilling procedure carried out three times. Anhydrous 1,4-dioxane and THF were obtained by distillation from sodium using benzophenone as indicator. Anhydrous CsF was purchased from Aldrich and stored in a nitrogen-filled glovebox.  $\text{Pd}(\text{dba})_2$  was purchased from Aldrich, ligands **L1**,<sup>1</sup> **L2**,<sup>2</sup> **L3**<sup>3</sup> and **L4**<sup>4</sup> were prepared following described procedures, and ligands **L5-L18** were purchased from Aldrich. Triflates ( $\pm$ )-**1A**<sup>5</sup>, ( $\pm$ )-**1B-C**<sup>6</sup> and silylphosphines **2** and **4**<sup>7</sup> were synthesized following literature procedures.

### 1-(2-methoxynaphthalen-1-yl)phthalazine.

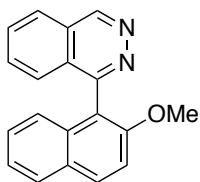

A dried Schlenk tube was charged with  $\text{Pd}(\text{PPh}_3)_4$  (5 mol%) and 1-chlorophthalazine (9.11 mmol, 1.5 g), and after three cycles of vacuum-argon flushing, DME (18 mL) was added and reaction mixture was stirred for 30 min at room temperature. (2-Methoxynaphthalen-1-yl)boronic acid (1.2 eq.) and 11 mL of  $\text{Na}_2\text{CO}_3$  (2M, aq.) were then sequentially added and the reaction mixture was refluxed overnight, then cooled to room temperature, quenched with  $\text{H}_2\text{O}$  (10 mL), and extracted with  $\text{CH}_2\text{Cl}_2$  ( $3 \times 20$  mL). The organic layer was dried over anhydrous  $\text{MgSO}_4$ , filtered, concentrated, and

the residue was purified by column chromatography on silica gel (EtOAc/*n*-hexane 2:1 Et<sub>3</sub>N 1%) to afford 1-(2-methoxynaphthalen-1-yl)phthalazine (1.62 g, 62%) as a light brown foam. <sup>1</sup>H NMR (500 MHz, CDCl<sub>3</sub>): δ 9.65 (d, 1H, *J* = 0.6 Hz), 8.06 (d, 2H, *J* = 8.6 Hz), 7.91-7.87 (m, 2H), 7.71 (td, 1H, *J* = 7.0 and 1.1 Hz), 7.49 (dd, 1H, *J* = 8.3 and 0.6 Hz), 7.45 (d, 1H, *J* = 9.1 Hz), 7.35 (td, 1H, *J* = 6.8 and 1.1 Hz), 7.28 (td, 1H, *J* = 6.8 and 1.1 Hz), 7.10 (d, 1H, *J* = 8.6 Hz), 3.78 (s, 3H). <sup>13</sup>C NMR (125 MHz, CDCl<sub>3</sub>): δ 158.1, 155.4, 151.0, 133.9, 132.6, 132.4, 131.4, 129.2, 128.2, 127.6, 127.3, 126.8, 126.6, 126.4, 124.7, 124.0, 118.7, 113.5, 56.8. HRMS (EI) calcd. for C<sub>19</sub>H<sub>14</sub>N<sub>2</sub>O (M<sup>+</sup>) 286.1106. Found 286.1104.

### 1-(phthalazin-1-yl)naphthalen-2-ol.

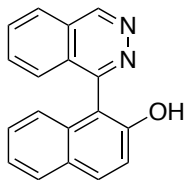

BBr<sub>3</sub> (1.2 eq.) was carefully added to a solution of 1-(2-methoxynaphthalen-1-yl)phthalazine (2.97 mmol, 850 mg) in dry CH<sub>2</sub>Cl<sub>2</sub> (12 mL) under argon. The reaction mixture was refluxed for 1 hour and stirred overnight at room temperature. The resulting mixture was cooled to 0 °C, quenched with H<sub>2</sub>O, and the formed precipitated was vigorously stirred in a CH<sub>2</sub>Cl<sub>2</sub>/Na<sub>2</sub>CO<sub>3</sub> (2M, aq.) mixture. The organic phase was separated and the aqueous layer was extracted with CH<sub>2</sub>Cl<sub>2</sub>. The combined organic layer was dried (MgSO<sub>4</sub>), filtered, concentrated, and the residue was purified by column chromatography on silica gel (CH<sub>2</sub>Cl<sub>2</sub>:MeOH 50:2 Et<sub>3</sub>N 1%) to afford 1-(phthalazin-1-yl)naphthalen-2-ol (646 mg, 80%) as a brown solid. <sup>1</sup>H NMR ((CD<sub>3</sub>)<sub>2</sub>SO, 500 MHz): δ 9.91 (br s, 1H), 9.78 (s, 1H), 8.27 (d, 1H, *J* = 8.1 Hz), 8.02-7.99 (m, 2H), 7.92 (d, 1H, *J* = 7.8 Hz), 7.85 (t, 1H, *J* = 8.1 Hz), 7.42 (d, 1H, *J* = 8.8 Hz), 7.40 (d, 1H, *J* = 9.0 Hz), 7.30 (td, 1H, *J* = 7.5 and 1.0 Hz), 7.25 (td, 1H, *J* = 7.7 and 1.3 Hz), 6.90 (d, 1H, *J* = 8.4 Hz). <sup>13</sup>C NMR ((CD<sub>3</sub>)<sub>2</sub>SO, 125 MHz): δ 157.5, 153.2, 150.7, 133.6, 133.0, 132.6, 130.6, 128.1, 127.8, 126.8, 126.7, 126.4, 126.2, 125.5, 123.6, 122.9, 118.2, 115.1. HRMS (EI) calcd. for C<sub>18</sub>H<sub>12</sub>N<sub>2</sub>O (M<sup>+</sup>) 272.0950. Found 272.0947.

## Synthesis of triflates ( $\pm$ )-1D and ( $\pm$ )-9. General procedure.

Following a described procedure,<sup>6b</sup> triflic anhydride (1.2 eq.) was carefully dropwise added to an under argon solution containing the corresponding alcohol, dry pyridine (1.2 eq.) and DMAP (cat.) in dry CH<sub>2</sub>Cl<sub>2</sub> (5 mL/mmol). The reaction mixture was stirred at room temperature overnight, then quenched with NaHCO<sub>3</sub> (sat. aq.) and the organic phase was separated. The aqueous layer was extracted with CH<sub>2</sub>Cl<sub>2</sub>, and the combined organic layer was dried (MgSO<sub>4</sub>), filtered, concentrated, and the residue was purified by column chromatography on silica gel using EtOAc/*n*-hexane mixtures.

### 1-(phthalazin-1-yl)naphthalen-2-yl trifluoromethanesulfonate ( $\pm$ )-1D.

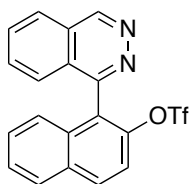

Following the general procedure starting from 1-(phthalazin-1-yl)naphthalen-2-ol (2.28 mmol, 620 mg), column chromatography (EtOAc/*n*-hexane 1:5→1:1) afforded ( $\pm$ )-1D (552 mg, 60%) as a light brown foam. <sup>1</sup>H NMR (400 MHz, CDCl<sub>3</sub>):  $\delta$  9.71 (s, 1H), 8.15 (d, 1H, *J* = 9.1 Hz), 8.12 (d, 1H, *J* = 8.1 Hz), 8.02 (d, 1H, *J* = 8.2 Hz), 7.96 (t, 1H, *J* = 7.7 Hz), 7.78 (t, 1H, *J* = 7.6 Hz), 7.64 (d, 1H, *J* = 9.1 Hz), 7.59 (t, 1H, *J* = 7.6 Hz), 7.46-7.41 (m, 2H), 7.28 (d, 1H, *J* = 8.8 Hz). <sup>13</sup>C NMR (100 MHz, CDCl<sub>3</sub>):  $\delta$  154.8, 151.4, 145.2, 133.0, 133.0, 132.9, 132.4, 132.0, 128.3, 128.2, 127.4, 126.9, 126.7, 126.4, 126.1, 126.1, 125.6, 119.5, 118.1 (q, *J*<sub>C,F</sub> = 310 Hz). HRMS (EI) calcd. for C<sub>19</sub>H<sub>12</sub>F<sub>3</sub>N<sub>2</sub>O<sub>3</sub>S (M<sup>+</sup>+1) 405.0519. Found 405.0521.

### [1,1'-binaphthalen]-2-yl trifluoromethanesulfonate ( $\pm$ )-9.

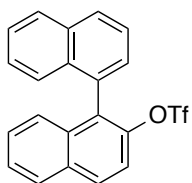

Following the general procedure starting from [1,1'-binaphthalen]-2-ol ( $\pm$ )-10<sup>8</sup> (1.0 mmol, 270 mg), column chromatography (EtOAc/*n*-hexane 1:10) afforded ( $\pm$ )-9 (342 mg, 85%) as a colourless viscous oil. Spectroscopic data matched those reported in the literature for the (*R*)-enantiomer.<sup>9</sup>

## Synthesis of Nonaflates ( $\pm$ )-8C-D and ( $\pm$ )-11. General procedure.

Following a described procedure,<sup>10</sup> over a suspension of the corresponding alcohol (1.0 equiv) and K<sub>2</sub>CO<sub>3</sub> (1.5 equiv) in acetonitrile (0.5 M), perfluorobutanesulfonyl fluoride (90%, 1.2 equiv) was added in one portion, and the resulting mixture was vigorously stirred for 24 h. After completion (TLC monitoring), the reaction mixture was filtered through a Celite pad, the solvent was removed in vacuum, and the residue was purified by flash column chromatography over silica gel.

### 1-(quinazolin-4-yl)naphthalen-2-yl nonaflate ( $\pm$ )-8C.

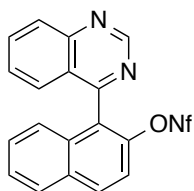

Following the general procedure starting from 1-(quinazolin-4-yl)naphthalen-2-ol (1.43 mmol, 390 mg), column chromatography (EtOAc/*n*-hexane 2:1) afforded ( $\pm$ )-8C (708 mg, 90%) as a light yellow solid. <sup>1</sup>H NMR (400 MHz, CDCl<sub>3</sub>):  $\delta$  9.55 (s, 1H), 8.21 (d, 1H, *J* = 8.4 Hz), 8.15 (d, 1H, *J* = 9.1 Hz), 8.02 (d, 1H, *J* = 8.2 Hz), 7.96 (t, 1H, *J* = 8.0 Hz), 7.65-7.58 (m, 2H), 7.53 (t, 1H, *J* = 8.0 Hz), 7.47-7.43 (m, 2H), 7.27 (d, 1H, *J* = 8.0 Hz). <sup>13</sup>C NMR (100 MHz, CDCl<sub>3</sub>):  $\delta$  163.3, 154.8, 150.6, 144.6, 134.5, 132.4, 132.3, 132.1, 129.0, 128.4, 128.3, 128.3, 127.5, 126.9, 126.4, 125.9, 125.0, 119.4, (nanaflate group not observed). <sup>19</sup>F NMR (377 MHz, CDCl<sub>3</sub>): -80.7 (t, *J*<sub>F-P</sub> = 11 Hz), -110.0 (q, *J*<sub>F-P</sub> = 15 Hz), -121.1 (m), -126.0 (m). HRMS (ESI) calcd. for C<sub>22</sub>H<sub>12</sub>F<sub>9</sub>N<sub>2</sub>O<sub>3</sub>S (M + H<sup>+</sup>) 555.0419. Found 555.0412.

### 1-(phthalazin-1-yl)naphthalen-2-yl nonaflate ( $\pm$ )-8D.

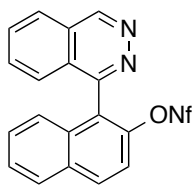

Following the general procedure starting from 1-(phthalazin-1-yl)naphthalen-2-ol (3.9 mmol, 1.07 g), column chromatography (CH<sub>2</sub>Cl<sub>2</sub>/MeOH 50:1) afforded ( $\pm$ )-8D (1.2 g, 56%) as a light yellow solid. <sup>1</sup>H NMR (400 MHz, CDCl<sub>3</sub>):  $\delta$  9.70 (s, 1H), 8.16 (d, 1H, *J* = 9.1 Hz), 8.11 (d, 1H, *J* = 8.1 Hz), 8.02 (d, 1H, *J* = 8.2 Hz), 7.96 (t, 1H, *J* = 7.6 Hz), 7.78 (t, 1H, *J* = 7.6 Hz), 7.64 (d, 1H, *J* = 9.2 Hz), 7.59 (t, 1H, *J* = 7.6 Hz), 7.47-7.41 (m, 2H), 7.28 (d, 1H, *J* = 8.8 Hz). <sup>13</sup>C NMR (100 MHz, CDCl<sub>3</sub>):  $\delta$  154.8, 151.4, 145.2, 133.0, 133.0, 132.9, 132.4, 132.0, 128.3, 128.2, 127.4, 126.9, 126.7, 126.4, 126.2, 126.2, 125.6, 119.5, (nanaflate

group not observed).  $^{19}\text{F}$  NMR (377 MHz,  $\text{CDCl}_3$ ):  $-80.7$  (t,  $J_{\text{F-P}} = 11$  Hz),  $-110.0$  (t,  $J_{\text{F-P}} = 15$  Hz),  $-121.2$  (m),  $-126.0$  (m). HRMS (ESI) calcd. for  $\text{C}_{22}\text{H}_{12}\text{F}_9\text{N}_2\text{O}_3\text{S}$  ( $\text{M} + \text{H}^+$ ): 555.0419. Found: 555.0414.

### 2'-(dimethylamino)-[1,1'-binaphthalen]-2-yl nonaflate ( $\pm$ )-11.

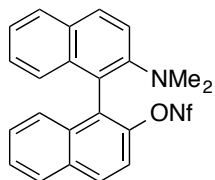

Following the general procedure starting from 2'-(dimethylamino)-[1,1'-binaphthalen]-2-ol ( $\pm$ )-12<sup>11</sup> (0.782 mmol, 245 mg), column chromatography ( $\text{EtOAc}/n$ -hexane 9:1) afforded ( $\pm$ )-11 (430 mg, 92%) as a white solid.  $^1\text{H}$  NMR (400 MHz,  $\text{CDCl}_3$ ):  $\delta$  8.03 (d,  $J = 9.1$  Hz, 1H), 7.99 (d,  $J = 8.4$  Hz, 1H), 7.97 (d,  $J = 8.8$  Hz, 1H), 7.84 (d,  $J = 8.1$  Hz, 1H), 7.61-7.52 (m, 2H), 7.50 (d,  $J = 9.0$  Hz, 1H), 7.47-7.35 (m, 2H), 7.35-7.28 (m, 1H), 7.18 (ddd,  $J = 8.3, 6.7, 1.4$  Hz, 1H), 6.94 (d,  $J = 8.5$  Hz, 1H), 2.50 (s, 6H).  $^{13}\text{C}$  NMR (100 MHz,  $\text{CDCl}_3$ ):  $\delta$  150.8, 145.6, 134.2, 133.6, 132.5, 130.2, 129.9, 129.7, 129.6, 128.3, 127.9, 127.5, 127.3, 126.7, 126.3, 125.2, 123.7, 120.0, 119.8, 119.4, 43.5 (nonaflate group not observed).  $^{19}\text{F}$  NMR (377 MHz,  $\text{CDCl}_3$ ):  $-80.7$  (t,  $J_{\text{F-P}} = 11$  Hz),  $-110.6$  (q,  $J_{\text{F-P}} = 11$  Hz),  $-121.2$  (m),  $-126.1$  (m). HRMS (ESI) calcd. for  $\text{C}_{26}\text{H}_{19}\text{F}_9\text{NO}_3\text{S}$  ( $\text{M} + \text{H}^+$ ) 596.0936. Found 596.0926.

### Synthesis of Silylphosphines 5a-e. General procedure.

A flamed-dried Schlenk tube was charged with the corresponding phosphine (1 equiv.). After purging with argon, dry THF was added (1.5 mL/mmol phosphine) and the resulting solution was cooled to  $-78$  °C.  $n$ -BuLi (1.5 equiv) was then added dropwise, the resulting mixture was allowed to reach  $-60$  °C (for aromatic phosphines) or  $-40$  °C (for aliphatic phosphines), stirred for 20 min and cooled again to  $-78$  °C. Finally,  $\text{Me}_3\text{SiCl}$  (1.5 equiv) was added dropwise and the crude mixture was allowed to reach room temperature. and concentrated to dryness. Dry pentane was added to complete precipitation of LiCl and the reaction crude filtered via filter-cannula under Ar. This extraction process was repeated twice, the solvents were removed under vacuum and the residue was either distilled or washed with pentane.

*Note: The purity of silylphosphines 5a-e (HPR<sub>2</sub> free) is crucial to get high and reproducible enantioselectivities in the C-P coupling reactions. Different commercially*

available  $\text{Me}_3\text{SiPPh}_2$  samples were checked and did not fulfill the purity requirements for this study.

Yields, procedure details and characterization data for silylphosphines **5a-e** are as follows:

#### Diphenyl(trimethylsilyl)phosphine **5a**.

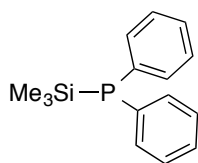

Following the general procedure starting from diphenylphosphine (7.3 g, 39.21 mmol), further distillation of the oily crude afforded **5a** (8.95 g, 88%) as a colorless liquid. Spectroscopic and physical data matched those of a commercial sample.<sup>12</sup>

#### Di(4-fluorophenyl)(trimethylsilyl)phosphine **5b**.

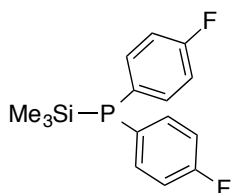

Following the general procedure starting from di(4-fluorophenyl)phosphine (4.20 g, 18.90 mmol), further distillation (117°C/2·10<sup>-4</sup> mbar) of the oily crude afforded **5b** (3.95 g, 71%) as a colorless liquid. <sup>1</sup>H NMR (400 MHz, C<sub>6</sub>D<sub>6</sub>): δ 7.23 (q, 4H,  $J_{H,H} = J_{H,F} = J_{H,P} = 6.8$  Hz), 6.74 (t, 4H,  $J_{H,H} = J_{H,F} = 8.4$  Hz), 0.06 (d, 9H,  $J_{H,P} = 6.5$  Hz). <sup>13</sup>C NMR (100 MHz, C<sub>6</sub>D<sub>6</sub>): δ 163.2 (d,  $J_{C-F} = 246$  Hz, 2C), 135.8 (dd,  $J_{C-P} = 18$  and  $J_{C-F} = 8$  Hz, 4C), 131.6 (dd,  $J_{C-P} = 17$  and  $J_{C-F} = 4$  Hz, 2C), 115.9 (dd,  $J_{C-F} = 21$  and  $J_{C-P} = 7$  Hz, 4C), -1.3 (d,  $J_{C-P} = 13$  Hz, 3C). <sup>31</sup>P NMR (161 MHz, C<sub>6</sub>D<sub>6</sub>): -59.3 (t,  $J_{P-F} = 4$  Hz). <sup>19</sup>F NMR (377 MHz, C<sub>6</sub>D<sub>6</sub>): -114.0 (d,  $J_{F-P} = 4$  Hz).

#### Di-*p*-tolyl(trimethylsilyl)phosphine **5c**.

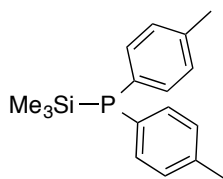

Following the general procedure starting from di-*p*-tolylphosphine (3.94 g, 18.39 mmol), further washing with pentane of the solid crude obtained afforded **5c** (4.38 g, 83 %) as a colorless solid. <sup>1</sup>H NMR (400 MHz, C<sub>6</sub>D<sub>6</sub>): δ 7.51 (t, 4H,  $J_{H,H} = J_{H,P} = 7.7$  Hz), 6.95 (d, 4H,  $J_{H,H} = 7.7$  Hz), 2.07 (s, 6H), 0.20 (d, 9H,  $J_{H,P} = 4.7$  Hz). <sup>13</sup>C NMR (100 MHz, C<sub>6</sub>D<sub>6</sub>): δ 137.3 (2C), 134.3 (d,  $J_{C-P} = 17$  Hz, 4C), 133.1 (d,  $J_{C-P} = 15$  Hz, 2C), 129.6 (d,  $J_{C-P} = 7$  Hz, 4C), 21.2 (2C), -1.0 (d,  $J_{C-P} = 11$  Hz, 3C). <sup>31</sup>P NMR (161 MHz, C<sub>6</sub>D<sub>6</sub>): -59.6.

### Di(4-methoxyphenyl)(trimethylsilyl)phosphine **5d**.

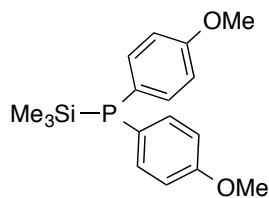

Following the general procedure, starting from di(4-methoxyphenyl)phosphine (2.0 g, 8.12 mmol), further washing with pentane of the solid crude afforded **5d** (1.90 g, 73%) as a colorless solid.  $^1\text{H}$  NMR (400 MHz,  $\text{C}_6\text{D}_6$ ):  $\delta$  7.51 (t, 4H,  $J_{\text{H,H}} = J_{\text{H,P}} = 7.8$  Hz), 6.76 (d, 4H,  $J_{\text{H,H}} = 8.2$  Hz), 3.27 (s, 6H), 0.21 (d, 9H,  $J_{\text{H,P}} = 4.7$  Hz).  $^{13}\text{C}$  NMR (100 MHz,  $\text{C}_6\text{D}_6$ ):  $\delta$  160.0 (2C), 135.6 (d,  $J_{\text{C-P}} = 18$  Hz, 4C), 127.2 (d,  $J_{\text{C-P}} = 14$  Hz, 2C), 114.6 (d,  $J_{\text{C-P}} = 7$  Hz, 4C), 54.7 (2C),  $-1.0$  (d,  $J_{\text{C-P}} = 13$  Hz, 3C).  $^{31}\text{P}$  NMR (161 MHz,  $\text{CDCl}_3$ ):  $-62.0$ .

### Diisobutyl(trimethylsilyl)phosphine **5e**.

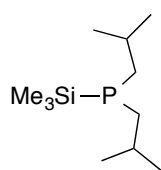

Following the general procedure starting from diisobutylphosphine (5.17 g, 35.36 mmol), further distillation ( $55^\circ\text{C}/1.2 \cdot 10^{-1}$  mbar) of the oily crude afforded **3e** (7.12 g, 92%) as a colorless liquid.  $^1\text{H}$  NMR (400 MHz,  $\text{C}_6\text{D}_6$ ):  $\delta$  1.69 (m, 2H) 1.46-1.34 (m, 4H), 1.05 (t, 12H,  $J_{\text{H-H}} = J_{\text{H-P}} = 7.6$  Hz), 0.13 (br s, 9H).  $^{13}\text{C}$  NMR (100 MHz,  $\text{C}_6\text{D}_6$ ):  $\delta$  33.4 (d,  $J_{\text{C-P}} = 16$  Hz, 2C), 28.9 (d,  $J_{\text{C-P}} = 15$  Hz, 2C), 24.5 (d,  $J_{\text{C-P}} = 9$  Hz, 2C), 23.8 (d,  $J_{\text{C-P}} = 10$  Hz, 2C),  $-2.0$  (d,  $J_{\text{C-P}} = 11$  Hz, 3C).  $^{31}\text{P}$  NMR (161 MHz,  $\text{C}_6\text{D}_6$ ):  $-113.5$ .

**Table 1. Screening of Josiphos ligands and different solvents using  $t\text{BuMe}_2\text{SiPPh}_2$ :**

| Ligand (mol%) | [Pd] (mol%) | t (h)                          | Solvent (c) | $\text{Ca}^\text{a}$ (%) | e.r. |       |
|---------------|-------------|--------------------------------|-------------|--------------------------|------|-------|
|               | (10)        | $\text{Pd}(\text{dba})_2$ (10) | 15          | THF (0.05M)              | 78   | 70:30 |



|                                                                                     |      |                                       |   |               |        |           |
|-------------------------------------------------------------------------------------|------|---------------------------------------|---|---------------|--------|-----------|
| 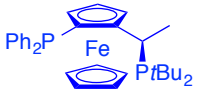   | (10) | Pd <sub>2</sub> (dba) <sub>3</sub> 5% | 6 | THF (0.05M)   | 58     | 77:23     |
|    | (10) | Pd(dba) <sub>2</sub> 10%              | 6 | THF (0.05M)   | 66     | 74.5:25.5 |
|    | (20) | Pd(dba) <sub>2</sub> 10%              | 6 | THF (0.05M)   | 57     | 77:23     |
|    | (10) | Pd <sub>2</sub> (dba) <sub>3</sub> 5% | 6 | THF (0.05M)   | 70     | 67:33     |
|    | (10) | Pd <sub>2</sub> (dba) <sub>3</sub> 5% | 6 | THF (0.05M)   | 30     | 78.5:21.5 |
|    | (10) | Pd <sub>2</sub> (dba) <sub>3</sub> 5% | 6 | THF (0.05M)   | traces | nd        |
|  | (10) | Pd <sub>2</sub> (dba) <sub>3</sub> 5% | 6 | THF (0.05M)   | 65     | 67:33     |
|  | (10) | Pd <sub>2</sub> (dba) <sub>3</sub> 5% | 6 | THF (0.05M)   | traces | nd        |
|  | 10%  | Pd <sub>2</sub> (dba) <sub>3</sub> 5% | 6 | THF (0.05M)   | 8      | nd        |
|  | 10%  | Pd <sub>2</sub> (dba) <sub>3</sub> 5% | 6 | THF (0.0125M) | 50     | 75.5:24.5 |

|                                                                                     |     |                                |   |                          |                 |           |
|-------------------------------------------------------------------------------------|-----|--------------------------------|---|--------------------------|-----------------|-----------|
| 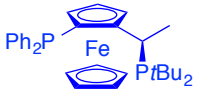   | 10% | $\text{Pd}_2(\text{dba})_3$ 5% | 6 | THF (0.05M)              | -               | 73.5:26.5 |
|    | 10% | $\text{Pd}(\text{OAc})_2$ 10%  | 6 | THF (0.05M)              | 61              | 73:27     |
|    | 10% | $\text{Pd}_2(\text{dba})_3$ 5% | 6 | DME (0.025M)             | 63              | 72.5:27.5 |
|    | 10% | $\text{Pd}_2(\text{dba})_3$ 5% | 6 | DMF (0.025M)             | 88 <sup>b</sup> | 70.5:29.5 |
|    | 10% | $\text{Pd}_2(\text{dba})_3$ 5% | 6 | Toluene (0.025M)         | 43              | 77:23     |
|    | 10% | $\text{Pd}_2(\text{dba})_3$ 5% | 6 | 1,2-DCE (0.025M)         | 21              | 86:14     |
|  | 10% | $\text{Pd}_2(\text{dba})_3$ 5% | 6 | DMSO (0.025M)            | 94 <sup>b</sup> | 87.5:12.5 |
|  | 10% | $\text{Pd}_2(\text{dba})_3$ 5% | 6 | 1,4-dioxane (0.025M)     | 39              | 82:18     |
|  | 10% | $\text{Pd}_2(\text{dba})_3$ 5% | 6 | $\text{CHCl}_3$ (0.025M) | traces          | nd        |
|  | 10% | $\text{Pd}_2(\text{dba})_3$ 5% | 6 | EtOH (0.025M)            | 12              | 94.5:5.5  |
|  | 10% | $\text{Pd}_2(\text{dba})_3$ 5% | 6 | MeCN (0.025M)            | 66              | 80:20     |

<sup>a</sup> Conversion was estimated by <sup>1</sup>H NMR. The exclusive formation of QUINAP + QUINAPO is assumed. <sup>b</sup> High consumption of the starting triflate was observed but the major product was the hydrolyzed triflate.

### Dynamic Kinetic Asymmetric C-P Cross-Coupling. General procedure:

A flame-dried Schlenk tube was charged with triflate (**±**)-**1A-D** or nonaflate (**±**)-**8C-D** (0.1 mmol), Pd(dba)<sub>2</sub> (10 mol%) and the required ligand (**L12** or **L16**) (10 mol%). After purging with argon, the tube was introduced in a nitrogen-filled glovebox and anhydrous CsF (0.2 mmol), deoxygenated dry THF (2 mL) and the appropriate silylphosphine (0.2 mmol) were sequentially added. The sealed Schlenk tube was brought out of the glovebox and placed into a preheated oil-bath at 40 °C until completion of the reaction (TLC monitoring). After reaching room temperature, the reaction crude was filtered through a pad of Celite and the solvents were removed under vacuum. The resulting residue was purified by column chromatography over silica gel under nitrogen. Starting materials, yields, reaction times, solvents used for chromatography, and characterization data for phosphines **3** are as follows:

*Note: Partial oxidation of phosphine **3** was observed inside HPLC chiral columns. Therefore, phosphine samples were oxidized (H<sub>2</sub>O<sub>2</sub> in acetone) to the corresponding phosphine oxides in order to determine the er's. The racemic phosphine oxides references were directly prepared by heating a mixture of the corresponding starting triflates (0.1 mmol, 1.0 equiv.) and HP(O)Ar<sub>2</sub> (0.11 mmol, 1.1 equiv.), dppp (5 mol%), Pd(OAc)<sub>2</sub> (5 mol%), iPr<sub>2</sub>NEt (0.4 mmol, 4.0 equiv.) in DMSO (0.5 mL) at 100 °C overnight.*

### Characterization of products **3Aa-Ce**:

#### (*S*)-1-(2-(diphenylphosphanyl)naphthalen-1-yl)isoquinoline **3Aa**.

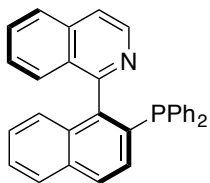

Following the general procedure using triflate (**±**)-**1A** and **5a** as starting materials and **L12** as the ligand, after 15 hours at 40 °C purification of the reaction crude through a short pad of SiO<sub>2</sub> (DCM/*n*-hexane 7:3 to DCM) afforded **3Aa** (41.5 mg, 95%) as a white solid. Spectroscopic and physical data matched those reported in the literature.<sup>Error!</sup>  
Marcador no definido. [ $\alpha$ ]<sub>D</sub><sup>20</sup> -138.0 (*c* 1.0, CHCl<sub>3</sub>) for er 95.5:4.5. [Lit.:<sup>Error!</sup> Marcador no definido. [ $\alpha$ ]<sub>D</sub><sup>25</sup> = -165.0 (*c* 1.0, CHCl<sub>3</sub>) for (*S*)-enantiomer (er 99.5:0.5)]. HPLC (IA column, Hex:Isop 85:15, T= 30°C, F= 1mL/min): t<sub>R</sub> 23.59 min (major) and 30.78 min (minor).

Note: A sample of **3Aa** with *er* 95.5:4.5 was crystallized from a hot Toluene/CH<sub>2</sub>Cl<sub>2</sub> 10:1 mixture, affording the enantioenriched product **3Aa** with *er* >99.5:0.5.

**(S)-2-(2-(diphenylphosphanyl)naphthalen-1-yl)-3-methylpyridine 3Ba.**

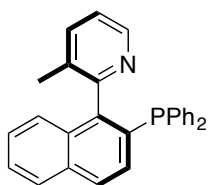

Following the general procedure using triflate (**±**)-**1B** and **5a** as starting materials and **L12** as the ligand, after 15 hours at 40 °C purification of the reaction crude through a short pad of SiO<sub>2</sub> (DCM/*n*-hexane 7:3 to DCM) afforded **3Ba** (36.0 mg, 89%) as a white solid. [ $\alpha$ ]<sub>D</sub><sup>20</sup> -27.5 (*c* 1.0, CHCl<sub>3</sub>) for *er* 95:5. <sup>1</sup>H NMR (400 MHz, CDCl<sub>3</sub>):  $\delta$  8.49 (d, 1H, *J* = 4.0 Hz), 7.85 (d, 1H, *J* = 8.0 Hz), 7.81 (d, 1H, *J* = 8.4 Hz), 7.61 (d, 1H, *J* = 8.0 Hz), 7.48 (t, 1H, *J* = 7.6 Hz), 7.36 (t, 1H, *J* = 8.0 Hz), 7.33-7.23 (m, 12H), 7.19 (d, 1H, *J* = 8.4 Hz), 1.94 (s, 3H). <sup>13</sup>C NMR (100 MHz, CD<sub>2</sub>Cl<sub>2</sub>):  $\delta$  157.0 (d, *J*<sub>C-P</sub> = 6 Hz), 146.0, 145.0 (d, *J*<sub>C-P</sub> = 34 Hz), 137.1 (d, *J*<sub>C-P</sub> = 13 Hz), 136.6 (d, *J*<sub>C-P</sub> = 12 Hz), 136.6, 133.0, 133.0, 132.8, 132.7, 132.5 (d, *J*<sub>C-P</sub> = 10 Hz), 132.5, 132.4 (d, *J*<sub>C-P</sub> = 2 Hz), 131.0 (d, *J*<sub>C-P</sub> = 8 Hz), 129.3 (d, *J*<sub>C-P</sub> = 2 Hz), 127.8, 127.7, 127.6, 127.5, 127.5, 127.4, 127.4, 126.2, 125.9, 125.1 (d, *J*<sub>C-P</sub> = 2 Hz), 122.0, 18.1 (d, *J*<sub>C-P</sub> = 3 Hz). <sup>31</sup>P NMR (161 MHz, CDCl<sub>3</sub>): -13.6. HRMS (ESI) calcd. for C<sub>28</sub>H<sub>23</sub>NP (*M* + *H*<sup>+</sup>) 404.1563. Found 404.1558. HPLC (IA column, Hex:isop 75:25, *T* = 30 °C, *F* = 1 mL/min): *t*<sub>R</sub> 10.20 min (major) and 13.06 min (minor).

**(S)-4-(2-(diphenylphosphanyl)naphthalen-1-yl)quinazoline 3Ca.**

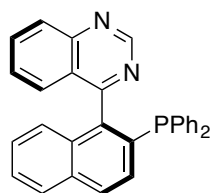

Following the general procedure using triflate (**±**)-**1C** and **5a** as starting materials and **L12** as the ligand, after 20 hours at 40 °C purification of the reaction crude through a short pad of SiO<sub>2</sub> (EtOAc/*n*-hexane 1:4 to 3:7) afforded **3Ca** (39.2 mg, 89%) as a light yellow solid. [ $\alpha$ ]<sub>D</sub><sup>20</sup> -152 (*c* 1.0, CHCl<sub>3</sub>) for *er* 95:5. After washing with acetone, a white solid is obtained (*er* >99.5:0.5). <sup>1</sup>H NMR (400 MHz, CDCl<sub>3</sub>):  $\delta$  9.44 (s, 1H), 8.16 (d, 1H, *J* = 8.5 Hz), 7.95 (d, 1H, *J* = 8.5 Hz), 7.92 (d, 1H, *J* = 8.2 Hz), 7.86 (ddd, 1H, *J* = 8.4, 5.2 and 3.2 Hz), 7.52 (t, 1H, *J* = 7.6 Hz), 7.46 (dd, 1H, *J*<sub>H-H</sub> = 8.5 and *J*<sub>H-P</sub> = 3.2 Hz), 7.35-7.16 (m, 13H), 7.09 (d, 1H, *J* = 8.4 Hz). <sup>13</sup>C NMR (100 MHz, CDCl<sub>3</sub>):  $\delta$  169.4 (d, *J*<sub>C-P</sub> = 7 Hz), 154.7, 150.1, 141.5 (d, *J*<sub>C-P</sub> = 33 Hz), 136.7 (d, *J*<sub>C-P</sub> = 10 Hz), 136.5 (d, *J*<sub>C-P</sub> = 11 Hz), 134.6 (d, *J*<sub>C-P</sub>

= 15 Hz), 133.9, 133.8, 133.6, 133.4, 133.3, 133.1, 131.8 (d,  $J_{C-P}$  = 8 Hz), 129.8, 129.3, 128.7, 128.6, 128.4, 128.3, 128.3, 128.3, 128.1, 127.5, 127.1, 127.0, 127.0, 126.0 (d,  $J_{C-P}$  = 2 Hz), 125.7 (d,  $J_{C-P}$  = 3 Hz).  $^{31}\text{P}$  NMR (161 MHz,  $\text{CDCl}_3$ ): -14.0. HRMS (ESI) calcd. for  $\text{C}_{30}\text{H}_{22}\text{N}_2\text{P}$  ( $\text{M} + \text{H}^+$ ) 441.1515. Found 441.1506. HPLC for phosphine oxide (IA column, Hex:Isop 75:25,  $T = 30^\circ\text{C}$ ,  $F = 1\text{ mL/min}$ ):  $t_R$  20.30 min (major) and 26.28 min (minor).

*Note: A lack of reproducibility was observed in terms of enantioselectivity most probably due to undetectable impurities accompanying triflate ( $\pm$ )-1C. Replacement of triflate ( $\pm$ )-1C by nonaflate ( $\pm$ )-8C gave rise to high levels of enantioselectivity and consistent reproducibility (er 94.5:5.5, 90% isolated yield).*

### (S)-1-(2-(diphenylphosphanyl)naphthalen-1-yl)phthalazine 3Da.

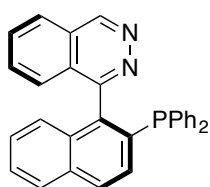

Following the general procedure using triflate ( $\pm$ )-1D and **5a** as starting materials and **L12** as the ligand, after 20 hours at  $40^\circ\text{C}$  purification of the reaction crude through a short pad of  $\text{SiO}_2$  (EtOAc/*n*-hexane 1:4 to 2:3) afforded **3Da** (31.1 mg, 71%) as a white solid.  $[\alpha]^{20}_D -77.3$  ( $c$  1.2,  $\text{CH}_2\text{Cl}_2$ ) for er 85.5:14.5.  $^1\text{H}$  NMR (400 MHz,  $\text{CDCl}_3$ ):  $\delta$  9.65 (s, 1H), 8.05 (d, 1H,  $J = 8.4$  Hz), 7.95 (d, 1H,  $J = 8.4$  Hz), 7.92 (d, 1H,  $J = 8.0$  Hz), 7.85 (t, 1H,  $J = 8.0$  Hz), 7.57-7.45 (m, 3H), 7.33-7.19 (m, 11H), 7.17-7.11 (m 2H).  $^{13}\text{C}$  NMR (100 MHz,  $\text{CD}_2\text{Cl}_2$ ):  $\delta$  160.6 (d,  $J_{C-P} = 6$  Hz), 151.3, 141.3 (d,  $J_{C-P} = 33$  Hz), 137.5 (d,  $J_{C-P} = 13$  Hz), 137.1 (d,  $J_{C-P} = 11$  Hz), 135.9 (d,  $J_{C-P} = 14$  Hz), 134.0, 134.0, 133.8, 133.7, 133.5, 133.1 (d,  $J_{C-P} = 8$  Hz), 132.9, 132.7, 130.4, 129.7, 129.0, 128.8, 128.8, 128.7, 128.7, 128.5, 127.9 (d,  $J_{C-P} = 3$  Hz), 127.5, 127.3, 126.9, 126.7, 126.5 (d,  $J_{C-P} = 2$  Hz), 126.2.  $^{31}\text{P}$  NMR (161 MHz,  $\text{CDCl}_3$ ): -14.1. HRMS (ESI) calcd. for  $\text{C}_{30}\text{H}_{22}\text{N}_2\text{P}$  ( $\text{M} + \text{H}^+$ ) 441.1515. Found 441.1509. HPLC (IA column, Hex:Isop 50:50,  $T = 30^\circ\text{C}$ ,  $F = 1\text{ mL/min}$ ):  $t_R$  14.56 min (minor) and 27.94 min (major).

### (S)-1-(2-(bis(4-fluorophenyl)phosphanyl)naphthalen-1-yl)isoquinoline 3Ab.

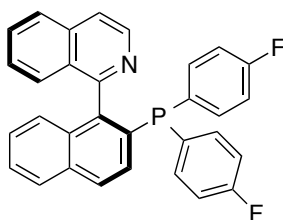

Following the general procedure using triflate ( $\pm$ )-1A and **5b** as starting materials and **L12** as the ligand, after 18 hours at  $40^\circ\text{C}$

°C purification of the reaction crude through a short pad of SiO<sub>2</sub> (DCM/*n*-hexane 7:3 to DCM) afforded **3Ab** (41.9 mg, 88%) as a white foam.  $[\alpha]^{20}_{\text{D}} -98.2$  (*c* 0.8, CHCl<sub>3</sub>) for er 90:10. <sup>1</sup>H NMR (400 MHz, CDCl<sub>3</sub>): δ 8.62 (d, 1H, *J* = 5.6 Hz), 7.94-7.90 (m, 3H), 7.76 (d, 1H, *J* = 5.6 Hz), 7.64-7.62 (m, 1H), 7.50 (t, 1H, *J* = 8.0 Hz), 7.36 (d, 1H, *J* = 8.4 Hz), 7.31-7.18 (m, 5H), 7.14-7.10 (m, 3H), 6.99 (t, 2H, *J*<sub>H,H</sub> = *J*<sub>H,F</sub> = 8.4 Hz), 6.91 (t, 2H, *J*<sub>H,H</sub> = *J*<sub>H,F</sub> = 8.4 Hz). <sup>13</sup>C NMR (100 MHz, CDCl<sub>3</sub>): δ 163.2 (d, *J*<sub>C-F</sub> = 247 Hz), 163.0 (d, *J*<sub>C-F</sub> = 247 Hz), 160.1 (d, *J*<sub>C-P</sub> = 6 Hz), 144.0 (d, *J*<sub>C-P</sub> = 32 Hz), 142.2, 135.9, 135.6 (dd, *J*<sub>C-P</sub> = 22 and *J*<sub>C-F</sub> = 8 Hz, 2C), 135.1 (dd, *J*<sub>C-P</sub> = 20 and *J*<sub>C-P</sub> = 8 Hz), 134.4 (d, *J*<sub>C-P</sub> = 33 Hz), 132.7-132.4 (5C), 130.0, 129.3, 128.9, 127.9, 127.3, 127.0, 127.0, 126.9, 126.8, 126.5 (d, *J*<sub>C-P</sub> = 2 Hz), 120.4, 115.6 (dd, *J*<sub>C-F</sub> = 21 and *J*<sub>C-P</sub> = 1 Hz, 2C), 115.5 (dd, *J*<sub>C-F</sub> = 21 and *J*<sub>C-P</sub> = 2 Hz, 2C). <sup>31</sup>P NMR (161 MHz, CDCl<sub>3</sub>): -15.9 (t, *J*<sub>P-F</sub> = 4 Hz). <sup>19</sup>F NMR (377 MHz, CDCl<sub>3</sub>): -112.0 (d, *J*<sub>F-P</sub> = 4 Hz), -113.1 (d, *J*<sub>F-P</sub> = 5 Hz). HRMS (ESI) calcd. for C<sub>31</sub>H<sub>21</sub>F<sub>2</sub>NP (M + H<sup>+</sup>) 476.1374. Found 476.1366. HPLC for phosphine oxide (IA column, Hex:Isop 85:15, T= 30°C, F= 1mL/min): t<sub>R</sub> 22.99 min (major) and 39.58 min (minor).

**(S)-2-(2-(bis(4-fluorophenyl)phosphanyl)naphthalen-1-yl)-3-methylpyridine**  
**3Bb.**

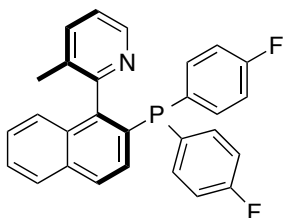

Following the general procedure using triflate (**±**)-**1B** and **5b** as starting materials and **L12** as the ligand, after 18 hours at 40 °C purification of the reaction crude through a short pad of SiO<sub>2</sub> (DCM/*n*-hexane 7:3 to DCM) afforded **3Bb** (35.8 mg, 82%) as a white foam.  $[\alpha]^{20}_{\text{D}} -88.9$  (*c* 1.4, CHCl<sub>3</sub>) for er 92.5:7.5. <sup>1</sup>H NMR (400 MHz, CDCl<sub>3</sub>): δ 8.46 (d, 1H, *J* = 4.6 Hz), 7.86 (d, 1H, *J* = 8.2 Hz), 7.83 (d, 1H, *J* = 8.5 Hz), 7.62 (d, 1H, *J* = 7.6 Hz), 7.50 (t, 1H, *J* = 8.0 Hz), 7.37 (t, 1H, *J* = 8.0 Hz), 7.29-7.22 (m, 4H), 7.20-7.17 (m, 3H), 7.03 (t, 2H, *J*<sub>H,H</sub> = *J*<sub>H,F</sub> = 8.6 Hz), 6.97 (t, 2H, *J*<sub>H,H</sub> = *J*<sub>H,F</sub> = 8.6 Hz), 1.95 (s, 3H). <sup>13</sup>C NMR (100 MHz, CDCl<sub>3</sub>): δ 163.2 (d, *J*<sub>C-F</sub> = 248 Hz), 163.1 (d, *J*<sub>C-F</sub> = 247 Hz), 157.8 (d, *J*<sub>C-P</sub> = 6 Hz), 146.8, 144.2 (d, *J*<sub>C-P</sub> = 33 Hz), 137.4, 135.5 (dd, *J*<sub>C-P</sub> = 22 and *J*<sub>C-F</sub> = 8 Hz, 2C), 135.2 (dd, *J*<sub>C-P</sub> = 21 and *J*<sub>C-F</sub> = 8 Hz, 2C), 133.7, 133.1 (d, *J*<sub>C-P</sub> = 2 Hz), 132.9 (d, *J*<sub>C-P</sub> = 12 Hz), 132.8 (dd, *J*<sub>C-P</sub> = 13 and *J*<sub>C-F</sub> = 4 Hz), 132.3 (dd, *J*<sub>C-P</sub> = 11 and *J*<sub>C-F</sub> = 4 Hz), 131.7 (d, *J*<sub>C-P</sub> = 8 Hz), 129.2, 128.5, 128.1, 127.0, 126.8, 125.7 (d, *J*<sub>C-P</sub> = 2 Hz), 122.8,

115.7 (dd,  $J_{C-F} = 21$  and  $J_{C-P} = 7$  Hz, 2C), 115.0 (dd,  $J_{C-F} = 21$  and  $J_{C-P} = 8$  Hz, 2C), 19.0 (d,  $J_{C-P} = 3$  Hz).  $^{31}\text{P}$  NMR (161 MHz,  $\text{CDCl}_3$ ): -15.4 (t,  $J_{P-F} = 5$  Hz).  $^{19}\text{F}$  NMR (377 MHz,  $\text{CDCl}_3$ ): -112.4 (d,  $J_{F-P} = 5$  Hz), -113.0 (d,  $J_{F-P} = 5$  Hz). HRMS (ESI) calcd. for  $\text{C}_{28}\text{H}_{21}\text{F}_2\text{NP}$  ( $\text{M} + \text{H}^+$ ) 440.1374. Found 440.1366. HPLC for phosphine oxide (IA column, Hex:Isop 75:25,  $T = 30^\circ\text{C}$ ,  $F = 1\text{ mL/min}$ ):  $t_R$  9.98 min (major) and 16.49 min (minor).

**(S)-4-(2-(bis(4-fluorophenyl)phosphanyl)naphthalen-1-yl)quinazoline 3Cb.**

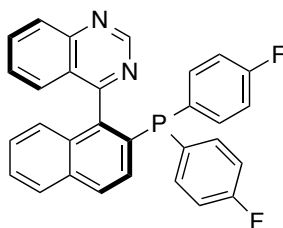

Following the general procedure and using nonaflate ( $\pm$ )-**8C** and **5b** as starting materials and **L12** as the ligand, after 18 hours at  $40^\circ\text{C}$  purification of the reaction crude through a short pad of  $\text{SiO}_2$  (EtOAc/*n*-hexane 1:4 to 3:7) afforded **3Cb** (41.6 mg, 87%) as a white foam.  $[\alpha]_D^{20} -48.0$  ( $c$  0.5,  $\text{CHCl}_3$ ) for  $93:7$ .  $^1\text{H}$  NMR (400 MHz,  $\text{CDCl}_3$ ):  $\delta$  9.36 (s, 1H), 8.10 (d, 1H,  $J = 8.0$  Hz), 7.91 (d, 1H,  $J = 8.5$  Hz), 7.87 (d, 1H,  $J = 8.0$  Hz), 7.82 (t, 1H,  $J = 8.0$  Hz), 7.48 (t, 1H,  $J = 8.0$  Hz), 7.31 (dd, 1H,  $J_{H-H} = 8.4$  and  $J_{H-P} = 3$  Hz), 7.30-7.24 (m, 2H), 7.24-7.18 (m, 1H), 7.13 (m, 2H), 7.12-7.04 (m, 3H), 6.95 (t, 2H,  $J_{H,H} = J_{H,F} = 8.6$  Hz), 6.87 (t, 2H,  $J_{H,H} = J_{H,F} = 8.6$  Hz).  $^{13}\text{C}$  NMR (100 MHz,  $\text{CDCl}_3$ ):  $\delta$  169.1 (d,  $J_{C-P} = 6$  Hz), 163.3 (d,  $J_{C-F} = 248$  Hz), 163.2 (d,  $J_{C-F} = 247$  Hz), 154.7, 150.2, 141.3 (d,  $J_{C-P} = 32$  Hz), 135.6 (dd,  $J_{C-P} = 22$  and  $J_{C-F} = 8$  Hz, 2C), 135.1 (dd,  $J_{C-P} = 21$  and  $J_{C-P} = 8$  Hz, 2C), 134.2 (d,  $J_{C-P} = 15$  Hz), 134.0, 133.4, 132.0-131.7 (3C), 129.5, 129.2, 128.8, 128.1, 127.6, 127.3, 127.2, 126.8, 125.9 (d,  $J_{C-P} = 2$  Hz), 125.5 (d,  $J_{C-P} = 3$  Hz), 115.8 (dd,  $J_{C-F} = 21$  and  $J_{C-P} = 2$  Hz, 2C), 115.7 (dd,  $J_{C-F} = 21$  and  $J_{C-P} = 3$  Hz, 2C).  $^{31}\text{P}$  NMR (161 MHz,  $\text{CDCl}_3$ ): -16.0 (t,  $J_{P-F} = 4$  Hz).  $^{19}\text{F}$  NMR (377 MHz,  $\text{CDCl}_3$ ): -111.9 (d,  $J_{F-P} = 4$  Hz), -112.5 (d,  $J_{F-P} = 5$  Hz). HRMS (ESI) calcd. for  $\text{C}_{30}\text{H}_{20}\text{F}_2\text{N}_2\text{P}$  ( $\text{M} + \text{H}^+$ ) 477.1327. Found 477.1324. HPLC (IA column, Hex:Isop 75:25,  $T = 30^\circ\text{C}$ ,  $F = 1\text{ mL/min}$ ):  $t_R$  11.18 min (major) and 19.33 min (minor).

**(S)-1-(2-(bis(4-fluorophenyl)phosphanyl)naphthalen-1-yl)phthalazine 3Db.**

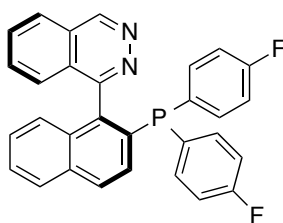

Following the general procedure and using triflate ( $\pm$ )-**1D** and **5b** as starting materials and **L12** as the ligand, after 20 hours at  $40^\circ\text{C}$  purification of the reaction crude through a short pad

of SiO<sub>2</sub> (EtOAc/*n*-hexane 1:4 to 2:3) afforded **3Db** (34.6 mg, 73%) as a light yellow solid.  $[\alpha]^{20}_{\text{D}} -120.0$  (*c* 0.4, CHCl<sub>3</sub>) for *er* 91:9. <sup>1</sup>H NMR (400 MHz, CDCl<sub>3</sub>): δ 9.63 (s, 1H), 8.05 (d, 1H, *J* = 8.0 Hz), 7.97 (d, 1H, *J* = 8.0 Hz), 7.92 (d, 1H, *J* = 8.0 Hz), 7.87 (t, 1H, *J* = 7.6 Hz), 7.58 (t, 1H, *J* = 7.6 Hz), 7.52 (t, 1H, *J* = 7.6 Hz), 7.38 (dd, 1H, *J*<sub>H,H</sub> = 8.4 and *J*<sub>H,P</sub> = 3.3 Hz), 7.31 (t, 1H, *J* = 8.0 Hz), 7.24-7.18 (m, 3H), 7.12-7.07 (m, 3H), 6.98 (t, 2H, *J*<sub>H,H</sub> = *J*<sub>H,F</sub> = 8.4 Hz), 6.91 (t, 2H, *J*<sub>H,H</sub> = *J*<sub>H,F</sub> = 8.4 Hz). <sup>13</sup>C NMR (100 MHz, CDCl<sub>3</sub>): δ 163.2 (d, *J*<sub>C-F</sub> = 248 Hz), 163.1 (d, *J*<sub>C-F</sub> = 247 Hz), 160.0 (d, *J*<sub>C-P</sub> = 6 Hz), 150.9, 140.4 (d, *J*<sub>C-P</sub> = 32 Hz), 135.5 (dd, *J*<sub>C-P</sub> = 22 and *J*<sub>C-F</sub> = 8 Hz, 2C), 135.3 (d, *J*<sub>C-P</sub> = 14 Hz), 135.1 (dd, *J*<sub>C-P</sub> = 20 and *J*<sub>C-P</sub> = 8 Hz, 2C), 133.5, 132.6 (d, *J*<sub>C-P</sub> = 7 Hz), 132.4 (d, *J*<sub>C-P</sub> = 4 Hz), 132.4, 132.3, 131.7 (dd, *J*<sub>C-P</sub> = 11 and *J*<sub>C-F</sub> = 4 Hz), 129.6, 129.4, 128.1, 127.5 (d, *J*<sub>C-P</sub> = 3 Hz), 127.2, 127.1, 126.5, 126.2, 126.1, 125.9, 115.7 (dd, *J*<sub>C-F</sub> = 7 and *J*<sub>C-P</sub> = 7 Hz, 2C), 115.5 (dd, *J*<sub>C-F</sub> = 7 and *J*<sub>C-P</sub> = 6 Hz, 2C). <sup>31</sup>P NMR (161 MHz, CDCl<sub>3</sub>): -15.8 (t, *J*<sub>P-F</sub> = 4 Hz). <sup>19</sup>F NMR (377 MHz, CDCl<sub>3</sub>): -112.2 (d, *J*<sub>F-P</sub> = 5 Hz), -112.6 (d, *J*<sub>F-P</sub> = 5 Hz). HRMS (ESI) calcd. for C<sub>30</sub>H<sub>20</sub>F<sub>2</sub>N<sub>2</sub>P (M + H<sup>+</sup>) 477.1327. Found 477.1321. HPLC (IA column, Hex:Isop 70:30, T= 30°C, F= 1mL/min): t<sub>R</sub> 19.51 min (minor) and 23.49 min (major).

**(*S*)-1-(2-(Di-*p*-tolylphosphanyl)naphthalen-1-yl)isoquinoline 3Ac.**

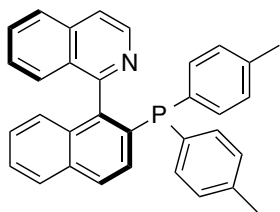

Following the general procedure using triflate (**±**)-**1A** and **5c** as starting materials and **L12** as the ligand, after 18 hours at 40 °C purification of the reaction crude through a short pad of SiO<sub>2</sub> (DCM/*n*-hexane 7:3 to DCM) afforded **3Ac** (39.3 mg, 84%) as a white solid. Spectroscopic and physical data matched those reported in the literature.<sup>13</sup>  $[\alpha]^{20}_{\text{D}} -82.5$  (*c* 0.6, CHCl<sub>3</sub>) for *er* 92:8. [Lit.:<sup>13</sup>  $[\alpha]^{25}_{\text{D}} -86.1$  (*c* 2.0, CHCl<sub>3</sub>) for (*S*)-enantiomer (*er* 96:4)]. HPLC for phosphine oxide (ADH column, Hex:Isop 70:30, T= 30°C, F= 1mL/min): t<sub>R</sub> 14.74 min (major) and 16.53 min (minor).

*Note: A sample of 3Ac with er 89:11 was crystallized by slow diffusion of n-hexane in a solution of the product in OEtAc, affording the formation of racemic crystals and the enantioenriched product 3Ac (er 97.5:2.5, 80% yield) was obtained from the mother liquor.*



**(S)-2-(2-(Di-*p*-tolylphosphanyl)naphthalen-1-yl)-3-methylpyridine 3Bc.**

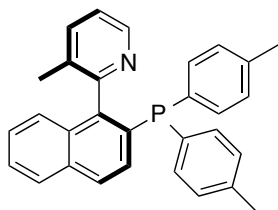

Following the general procedure using triflate (**±**)-**1B** and **5c** as starting materials and **L12** as the ligand, after 18 hours at 40 °C purification of the reaction crude through a short pad of SiO<sub>2</sub> (DCM to DCM/MeOH 100:1) afforded **3Bc** (35.2 mg, 81%) as a light white foam.  $[\alpha]^{20}_{\text{D}} -84.6$  (*c* 1.3, CHCl<sub>3</sub>) for er 93:7. <sup>1</sup>H NMR (400 MHz, CDCl<sub>3</sub>): δ 8.51 (d, 1H, *J* = 4.8 Hz), 7.86 (d, 1H, *J* = 8.2 Hz), 7.82 (d, 1H, *J* = 8.4 Hz), 7.63 (d, 1H, *J* = 7.7 Hz), 7.49 (t, 1H, *J* = 8.2 Hz), 7.39-7.35 (m, 2H), 7.29 (m, 1H), 7.24-7.09 (m, 9H), 2.37 (s, 3H), 2.33 (s, 3H), 1.96 (s, 3H). <sup>13</sup>C NMR (100 MHz, CDCl<sub>3</sub>): δ 158.3 (d, *J*<sub>C-P</sub> = 6 Hz), 146.7, 145.0 (d, *J*<sub>C-P</sub> = 33 Hz), 138.3, 137.9, 137.3, 134.1 (d, *J*<sub>C-P</sub> = 11 Hz), 133.9 (d, *J*<sub>C-P</sub> = 14 Hz), 133.8 (d, *J*<sub>C-P</sub> = 20 Hz, 2C), 133.3 (d, *J*<sub>C-P</sub> = 19 Hz, 2C), 133.1 (d, *J*<sub>C-P</sub> = 3 Hz), 131.7 (d, *J*<sub>C-P</sub> = 8 Hz), 129.8 (d, *J*<sub>C-P</sub> = 2 Hz, 2C), 129.1 (d, *J*<sub>C-P</sub> = 7 Hz, 2C), 129.0 (d, *J*<sub>C-P</sub> = 7 Hz, 2C), 128.1, 127.9, 126.6, 126.5, 125.8 (d, *J*<sub>C-P</sub> = 2 Hz, 2C), 122.6, 21.3, 21.2, 19.0 (d, *J*<sub>C-P</sub> = 3 Hz). <sup>31</sup>P NMR (161 MHz, CDCl<sub>3</sub>): -15.2. HRMS (ESI) calcd. for C<sub>30</sub>H<sub>27</sub>NP (M + H<sup>+</sup>) 432.1876. Found 432.1867. HPLC for phosphine oxide (IA column, Hex:Isop 70:30, T= 30°C, F= 1mL/min): t<sub>R</sub> 11.13 min (major) and 17.55 min (minor).

**(S)-4-(2-(di-*p*-tolylphosphanyl)naphthalen-1-yl)quinazoline 3Cc.**

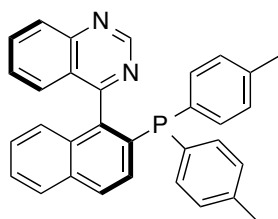

Following the general procedure and using nonaflate (**±**)-**8C** and **5c** as starting materials and **L12** as the ligand, after 18 hours at 40 °C purification of the reaction crude through a short pad of SiO<sub>2</sub> (EtOAc/*n*-hexane 1:4 to 3:7) afforded **3Cc** (41.6 mg, 89%) as a light white foam.  $[\alpha]^{20}_{\text{D}} -102.1$  (*c* 0.9, CHCl<sub>3</sub>) for er 93:7. <sup>1</sup>H NMR (400 MHz, CDCl<sub>3</sub>): δ 9.41 (s, 1H), 8.13 (d, 1H, *J* = 8.4 Hz), 7.92 (d, 1H, *J* = 8.7 Hz), 7.90 (d, 1H, *J* = 8.4 Hz), 7.84 (m, 1H), 7.50 (t, 1H, *J* = 7.6 Hz), 7.44 (dd, 1H, *J*<sub>H,H</sub> = 8.5 and *J*<sub>H,P</sub> = 3.3 Hz), 7.32-7.28 (m, 3H), 7.14-7.09 (m, 4H), 7.06-7.00 (m, 5H), 2.32 (s, 3H), 2.29 (s, 3H). <sup>13</sup>C NMR (100 MHz, CDCl<sub>3</sub>): δ 169.4 (d, *J*<sub>C-P</sub> = 7 Hz), 154.7, 150.1, 141.0 (d, *J*<sub>C-P</sub> = 32 Hz), 138.6, 138.2, 135.3 (d, *J*<sub>C-P</sub> = 16 Hz), 133.8, 133.7, 133.6, 133.3, 133.3, 133.2, 133.1, 133.0 (d, *J*<sub>C-P</sub> = 5 Hz), 131.8 (d, *J*<sub>C-P</sub> = 7 Hz), 129.7, 129.2, 129.1, 129.1, 129.0, 128.6, 128.0, 127.4, 127.1, 126.9, 125.9 (d, *J*<sub>C-P</sub> = 2 Hz), 125.6 (d, *J*<sub>C-P</sub> = 3 Hz), 21.2, 21.2. <sup>31</sup>P

NMR (161 MHz, CDCl<sub>3</sub>): −15.2. HRMS (ESI) calcd. for C<sub>32</sub>H<sub>26</sub>N<sub>2</sub>P (M + H<sup>+</sup>) 469.1828. Found 469.1818. HPLC for phosphine oxide (IA column, Hex:Isop 75:25, T= 30°C, F= 1mL/min): t<sub>R</sub> 18.19 min (major) and 25.41 min (minor).

**(S)-1-(2-(bis(4-methoxyphenyl)phosphanyl)naphthalen-1-yl)isoquinoline 3Ad.**

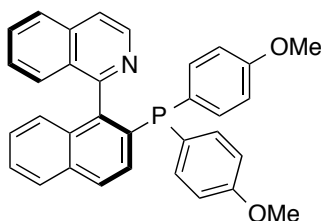

Following the general procedure using triflate (**±**)-**1A** and **5d** as starting materials and **L12** as the ligand, after 18 hours at 40 °C purification of the reaction crude through a short pad of SiO<sub>2</sub> (EtOAc/*n*-hexane 1:4 to 3:7) afforded **3Ad** (37.2 mg, 74%) as a white foam. [α]<sub>D</sub><sup>20</sup> −40.0 (*c* 1.0, CHCl<sub>3</sub>)

for er 78:22. <sup>1</sup>H NMR (400 MHz, CDCl<sub>3</sub>): δ 8.64 (d, 1H, *J* = 5.6 Hz), 7.92-7.89 (m, 3H), 7.74 (d, 1H, *J* = 5.6 Hz), 7.61 (t, 1H, *J* = 7.3 Hz), 7.49-7.43 (m, 2H), 7.29-7.17 (m, 5H), 7.11-7.07 (m, 3H), 6.88 (d, 2H, *J* = 8.2 Hz), 6.74 (d, 2H, *J* = 8.2 Hz), 3.79 (s, 3H), 3.77 (s, 3H). <sup>13</sup>C NMR (100 MHz, CDCl<sub>3</sub>): δ 160.4 (d, *J*<sub>C-P</sub> = 6 Hz), 159.9, 159.7, 143.3 (d, *J*<sub>C-P</sub> = 32 Hz), 142.2, 135.9 (d, *J*<sub>C-P</sub> = 14 Hz), 135.8, 135.2 (d, *J*<sub>C-P</sub> = 22 Hz, 2C), 134.7 (d, *J*<sub>C-P</sub> = 20 Hz, 2C), 133.4, 132.6 (d, *J*<sub>C-P</sub> = 7 Hz), 129.9, 129.6, 128.9 (d, *J*<sub>C-P</sub> = 3 Hz), 128.5, 128.3, 128.2 (d, *J*<sub>C-P</sub> = 1 Hz), 127.8, 127.5, 126.8, 126.7, 126.6, 126.5, 126.4 (d, *J*<sub>C-P</sub> = 2 Hz), 120.2, 113.9 (d, *J*<sub>C-P</sub> = 7 Hz, 2C), 113.8 (d, *J*<sub>C-P</sub> = 7 Hz, 2C), 55.1 (2C). <sup>31</sup>P NMR (161 MHz, CDCl<sub>3</sub>): −16.6. HRMS (ESI) calcd. for C<sub>33</sub>H<sub>27</sub>NO<sub>2</sub>P (M + H<sup>+</sup>) 500.1774. Found 500.1763. HPLC (IA column, Hex:Isop 70:30, T= 30°C, F= 1mL/min): t<sub>R</sub> 17.78 min (major) and 22.36 min (minor).

**(S)-2-(2-(bis(4-methoxyphenyl)phosphanyl)naphthalen-1-yl)-3-methylpyridine 3Bd.**

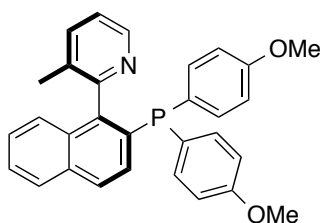

Following the general procedure using triflate (**±**)-**1B** and **5d** as starting materials and **L12** as the ligand, after 18 hours at 40 °C purification of the reaction crude through a very short pad of SiO<sub>2</sub> (EtOAc/*n*-hexane 1:4 to 3:7) afforded **3Bd** (35.8 mg, 77%) as a light yellow foam. [α]<sub>D</sub><sup>20</sup> −10.4 (*c*

1.3, CHCl<sub>3</sub>) for er 85:15. <sup>1</sup>H NMR (400 MHz, CDCl<sub>3</sub>): δ 8.51 (d, 1H, *J* = 4.8 Hz), 7.87 (d,

1H,  $J = 8.2$  Hz), 7.84 (d, 1H,  $J = 8.4$  Hz), 7.63 (d, 1H,  $J = 7.6$  Hz), 7.50 (t, 1H,  $J = 7.6$  Hz), 7.39-7.32 (m, 2H), 7.30-7.24 (m, 3H), 7.21-7.17 (m, 3H), 6.90 (d, 2H,  $J = 8.1$  Hz), 6.85 (d, 2H,  $J = 8.2$  Hz), 3.83 (s, 3H), 3.80 (s, 3H), 1.95 (s, 3H).  $^{13}\text{C}$  NMR (100 MHz,  $\text{CDCl}_3$ ):  $\delta$  160.0, 159.7, 158.1 (d,  $J_{\text{C-P}} = 6$  Hz), 146.7, 144.5 (d,  $J_{\text{C-P}} = 32$  Hz), 137.3, 135.2 (d,  $J_{\text{C-P}} = 21$  Hz, 2C), 134.8 (d,  $J_{\text{C-P}} = 20$  Hz, 2C), 134.3 (d,  $J_{\text{C-P}} = 13$  Hz), 133.6, 133.1 (d,  $J_{\text{C-P}} = 3$  Hz), 131.7 (d,  $J_{\text{C-P}} = 7$  Hz), 129.5, 128.4 (d,  $J_{\text{C-P}} = 9$  Hz), 128.2 (d,  $J_{\text{C-P}} = 8$  Hz), 128.0, 128.0, 126.5 (d,  $J_{\text{C-P}} = 2$  Hz), 125.7 (d,  $J_{\text{C-P}} = 3$  Hz), 122.6, 114.0 (d,  $J_{\text{C-P}} = 7$  Hz, 2C), 113.8 (d,  $J_{\text{C-P}} = 7$  Hz, 2C), 55.1, 55.1, 19.0 (d,  $J_{\text{C-P}} = 3$  Hz).  $^{31}\text{P}$  NMR (161 MHz,  $\text{CDCl}_3$ ):  $-16.3$ . HRMS (ESI) calcd. for  $\text{C}_{30}\text{H}_{27}\text{NO}_2\text{P}$  ( $\text{M} + \text{H}^+$ ) 464.1774. Found 464.1763. HPLC for phosphine oxide (IA column, Hex:Isop 50:50,  $T = 30^\circ\text{C}$ ,  $F = 1\text{ mL/min}$ ):  $t_{\text{R}}$  8.40 min (major) and 16.43 min (minor).

**(S)-4-(2-(bis(4-methoxyphenyl)phosphanyl)naphthalen-1-yl)quinazoline 3Cd.**

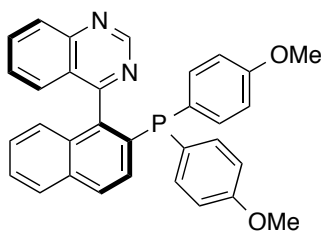

Following the general procedure and using nonaflate ( $\pm$ )-**8C** as starting material and **L12** as the ligand, after 18 hours at  $40^\circ\text{C}$  purification of the reaction crude through a very short pad of  $\text{SiO}_2$  (EtOAc/*n*-hexane 1:4 to 35:65) afforded **3Cd** (37.0 mg, 74%) as a light yellow foam.  $[\alpha]^{20}_{\text{D}} -39.4$  ( $c$  0.5,  $\text{CHCl}_3$ ) for er 89.5:10.5.  $^1\text{H}$  NMR (400 MHz,  $\text{CDCl}_3$ ):  $\delta$  9.41 (s, 1H), 8.12 (d, 1H,  $J = 8.5$  Hz), 7.93 (d, 1H,  $J = 9.1$  Hz), 7.90 (d, 1H,  $J = 9.4$  Hz), 7.84 (m, 1H), 7.49 (t, 1H,  $J = 7.8$  Hz), 7.42 (dd, 1H,  $J_{\text{H-H}} = 8.5$  and  $J_{\text{H-P}} = 3.4$  Hz), 7.32-7.23 (m, 3H), 7.16 (d, 1H,  $J = 7.4$  Hz), 7.14 (d, 1H,  $J = 7.4$  Hz), 7.09-7.04 (m, 3H), 6.84 (d, 2H,  $J = 7.9$  Hz), 6.73 (d, 2H,  $J = 8.6$  Hz), 3.79 (s, 3H), 3.76 (s, 3H).  $^{13}\text{C}$  NMR (100 MHz,  $\text{CDCl}_3$ ):  $\delta$  169.4 (d,  $J_{\text{C-P}} = 6$  Hz), 160.1, 159.9, 154.8, 150.1, 140.5 (d,  $J_{\text{C-P}} = 31$  Hz), 135.9 (d,  $J_{\text{C-P}} = 16$  Hz), 135.3 (d,  $J_{\text{C-P}} = 22$  Hz, 2C), 134.8 (d,  $J_{\text{C-P}} = 22$  Hz, 2C), 133.7, 133.3, 131.8 (d,  $J_{\text{C-P}} = 7$  Hz), 129.5, 129.1, 128.6, 128.1, 127.6 (d,  $J_{\text{C-P}} = 2$  Hz), 127.5, 127.4, 127.1, 126.9, 126.8, 125.8 (d,  $J_{\text{C-P}} = 2$  Hz), 125.6 (d,  $J_{\text{C-P}} = 3$  Hz), 114.1 (d,  $J_{\text{C-P}} = 8$  Hz, 2C), 114.0 (d,  $J_{\text{C-P}} = 8$  Hz, 2C), 55.1, 55.1.  $^{31}\text{P}$  NMR (161 MHz,  $\text{CDCl}_3$ ):  $-16.3$ . HRMS (ESI) calcd. for  $\text{C}_{32}\text{H}_{26}\text{N}_2\text{O}_2\text{P}$  ( $\text{M} + \text{H}^+$ ) 501.1726. Found 501.1700. HPLC for phosphine oxide (IA column, Hex:Isop 70:30,  $T = 30^\circ\text{C}$ ,  $F = 1\text{ mL/min}$ ):  $t_{\text{R}}$  17.29 min (major) and 27.00 min (minor).

**(S)-2-(2-(diisobutylphosphanyl)naphthalen-1-yl)-3-methylpyridine 3Be.**

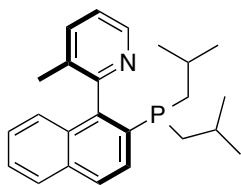

Following the general procedure using triflate (**±**)-**1B** and **5e** as starting materials and **L16** as the ligand, after 40 hours at 40 °C purification of the reaction crude through a short pad of SiO<sub>2</sub> (EtOAc/*n*-hexane 5:95 to 1:9) afforded **3Be** (33.8 mg, 93%) as a white foam.  $[\alpha]^{20}_{\text{D}} -73.7$  (*c* 1.1, CHCl<sub>3</sub>) for er 85:15. <sup>1</sup>H NMR (400 MHz, CDCl<sub>3</sub>): δ 8.58 (d, 1H, *J* = 3 Hz), 7.91 (d, 1H, *J* = 8.4 Hz), 7.86 (d, 1H, *J* = 8.1 Hz), 7.70 (d, 1H, *J* = 8.4 Hz), 7.64 (d, 1H, *J* = 7.6 Hz), 7.46 (t, 1H, *J* = 7.9 Hz), 7.35-7.30 (m, 2H), 7.13 (d, 1H, *J* = 8.3 Hz), 2.01 (s, 3H), 1.84 (m, 1H), 1.71 (m, 1H), 1.60-1.49 (m, 3H), 1.39 (m, 1H), 0.95 (d, 3H, *J* = 6.4 Hz), 0.92 (d, 3H, *J* = 6.3 Hz), 0.82 (d, 3H, *J* = 6.3 Hz), 0.78 (d, 3H, *J* = 6.4 Hz). <sup>13</sup>C NMR (100 MHz, CDCl<sub>3</sub>): δ 159.0 (d, *J*<sub>C-P</sub> = 6 Hz), 146.7, 145.2 (d, *J*<sub>C-P</sub> = 32 Hz), 137.4, 135.9 (d, *J*<sub>C-P</sub> = 17 Hz), 133.8, 133.0 (d, *J*<sub>C-P</sub> = 3 Hz), 131.8 (d, *J*<sub>C-P</sub> = 7 Hz), 128.3, 128.1, 126.6, 126.5, 126.4 (d, *J*<sub>C-P</sub> = 3 Hz), 126.0 (d, *J*<sub>C-P</sub> = 2 Hz), 122.7, 41.5 (d, *J*<sub>C-P</sub> = 13 Hz), 38.7 (d, *J*<sub>C-P</sub> = 14 Hz), 26.7 (d, *J*<sub>C-P</sub> = 14 Hz), 26.1 (d, *J*<sub>C-P</sub> = 13 Hz), 25.0 (d, *J*<sub>C-P</sub> = 8 Hz), 24.6 (d, *J*<sub>C-P</sub> = 9 Hz), 24.2 (d, *J*<sub>C-P</sub> = 10 Hz), 24.0 (d, *J*<sub>C-P</sub> = 9 Hz), 19.1 (d, *J*<sub>C-P</sub> = 3 Hz). <sup>31</sup>P NMR (161 MHz, CDCl<sub>3</sub>): -43.9. HRMS (ESI) calcd. for C<sub>24</sub>H<sub>30</sub>NP (*M* + *H*<sup>+</sup>) 364.2189. Found 364.2177. HPLC (ADH column, Hex:Isop 95:5, *T* = 30 °C, *F* = 1 mL/min): *t*<sub>R</sub> 17.49 min (major) and 18.32 min (minor).

**(S)-4-(2-(diisobutylphosphanyl)naphthalen-1-yl)quinazoline 3Ce.**

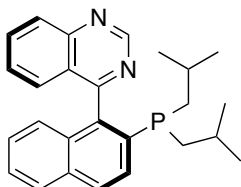

Following the general procedure and using nonaflate (**±**)-**8C** and **5e** as starting materials and **L16** as the ligand, after 40 hours at 40 °C purification of the reaction crude through a short pad of SiO<sub>2</sub> (DCM to DCM/MeOH 50:1) afforded **3Ce** (28.8 mg, 72%) as a white solid.  $[\alpha]^{20}_{\text{D}} -29.5$  (*c* 1.0, CHCl<sub>3</sub>) for er 72.5:27.5. <sup>1</sup>H NMR (400 MHz, CDCl<sub>3</sub>): δ 9.49 (s, 1H), 8.18 (d, 1H, *J* = 8.5 Hz), 8.05 (d, 1H, *J* = 8.5 Hz), 7.94 (d, 1H, *J* = 8.2 Hz), 7.89 (t, 1H, *J* = 7.7 Hz), 7.80 (d, 1H, *J* = 8.6 Hz), 7.50 (t, 1H, *J* = 7.5 Hz), 7.44-7.38 (m, 2H), 7.31 (t, 1H, *J* = 7.8 Hz), 7.06 (d, 1H, *J* = 8.5 Hz), 1.79-1.76 (m, 2H), 1.55 (m, 1H), 1.43-1.37 (m, 3H), 0.87 (d, 3H, *J* = 6.5 Hz), 0.83 (d, 3H, *J* = 6.5 Hz), 0.74 (d, 3H, *J* = 5.8 Hz), 0.62 (d, 3H, *J* = 5.7 Hz). <sup>13</sup>C NMR (100 MHz, CDCl<sub>3</sub>): δ 170.3 (d, *J*<sub>C-P</sub> = 7 Hz), 154.6, 150.0,

141.7 (d,  $J_{C-P}$  = 33 Hz), 137.0 (d,  $J_{C-P}$  = 19 Hz), 133.8, 133.4, 131.6 (d,  $J_{C-P}$  = 8 Hz), 129.3, 128.7, 128.0, 127.6, 127.0, 126.9, 126.7, 126.2 (d,  $J_{C-P}$  = 3 Hz), 126.0, 126.0, 40.8 (d,  $J_{C-P}$  = 13 Hz), 38.9 (d,  $J_{C-P}$  = 13 Hz), 26.2 (d,  $J_{C-P}$  = 14 Hz), 26.0 (d,  $J_{C-P}$  = 13 Hz), 24.7 (d,  $J_{C-P}$  = 8 Hz), 24.5 (d,  $J_{C-P}$  = 9 Hz), 23.8 (d,  $J_{C-P}$  = 9 Hz), 23.7 (d,  $J_{C-P}$  = 10 Hz).  $^{31}\text{P}$  NMR (161 MHz,  $\text{CDCl}_3$ ): -44.3. HRMS (ESI) calcd. for  $\text{C}_{26}\text{H}_{30}\text{N}_2\text{P}$  ( $\text{M} + \text{H}^+$ ) 401.2141. Found 401.2132. HPLC (ADH column, Hex:Isop 85:15,  $T = 30^\circ\text{C}$ ,  $F = 1\text{ mL/min}$ ):  $t_R$  5.79 min (minor) and 6.33 min (major).

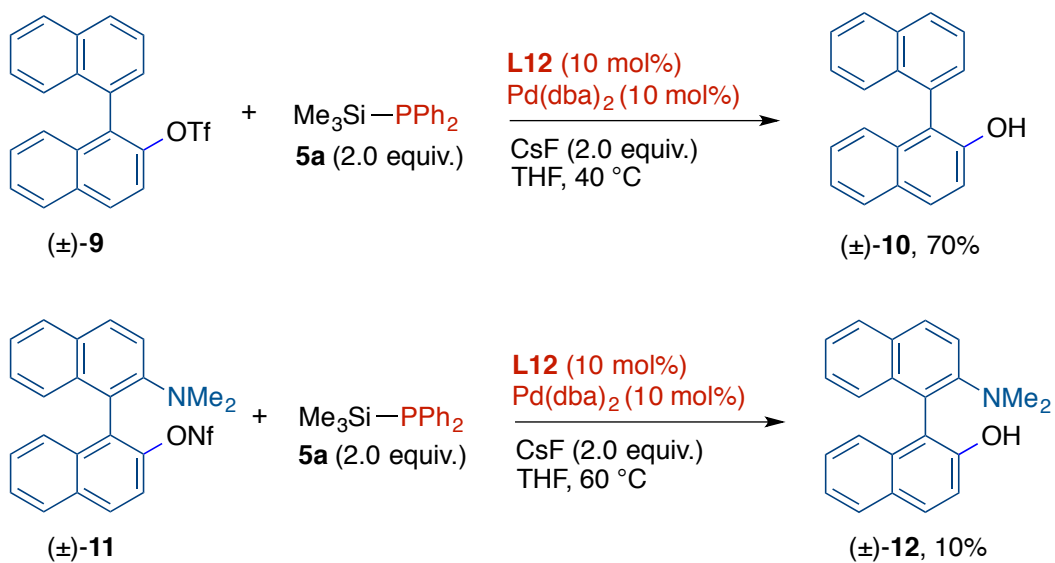

**Figure S1.** Experiments with Triflate **9** and Nonaflate **11**.

Following the general procedure for the Dynamic Kinetic Asymmetric C-P Cross-Coupling using **L12** as the ligand and triflate **9** or nonaflate **11** as the starting materials, after 18 hours at 40 °C and 60 °C respectively, the formation of the hydrolysis products **10**, **12** together with the starting materials was observed.

Chemical structure: c1ccc2c(c1)c(c[nH]2)-c3ccccc3S(=O)(=O)F

<sup>1</sup>H NMR spectrum (CDCl<sub>3</sub>) showing aromatic signals and a triflate singlet. The x-axis is labeled f1 (ppm) and ranges from 10.5 to 1.0. The y-axis represents intensity.

Peak list (ppm): 9.7092, 8.1673, 8.1446, 8.1270, 8.1067, 8.0275, 8.0068, 7.9768, 7.9582, 7.9401, 7.9374, 7.8051, 7.8020, 7.7844, 7.7808, 7.7665, 7.7635, 7.6545, 7.6488, 7.6311, 7.6081, 7.5939, 7.5905, 7.5869, 7.5725, 7.5699, 7.4640, 7.4444, 7.4315, 7.4277, 7.4241, 7.4094, 7.4062, 7.2886, 7.2677, 7.2599.

Integration values: 1.00, 0.96, 1.00, 1.02, 1.04, 0.85, 2.05, 2.05, 1.21.

Chemical structure: c1ccc2c(c1)c(c3ccccc23)C4=CN=CN=C4OS(=O)(=O)F

<sup>13</sup>C NMR spectrum (ppm):

- 154.8
- 151.4
- 145.2
- 133.0
- 133.0
- 132.9
- 132.4
- 132.0
- 128.3
- 128.2
- 127.4
- 126.9
- 126.4
- 126.1
- 125.8
- 125.6
- 125.6
- 119.6
- 119.5
- 116.5
- 113.6

S23

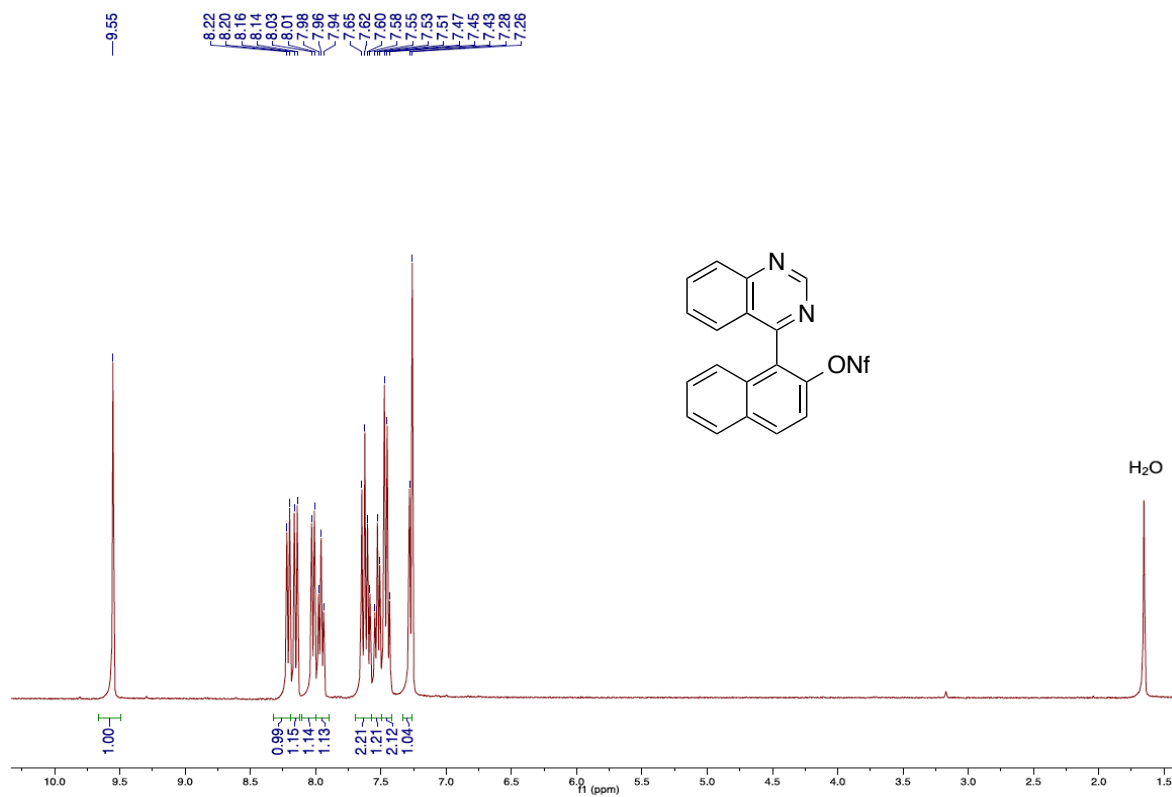

**Figure S4.** <sup>1</sup>H NMR (CDCl<sub>3</sub>, 400 MHz) of (±)-8C

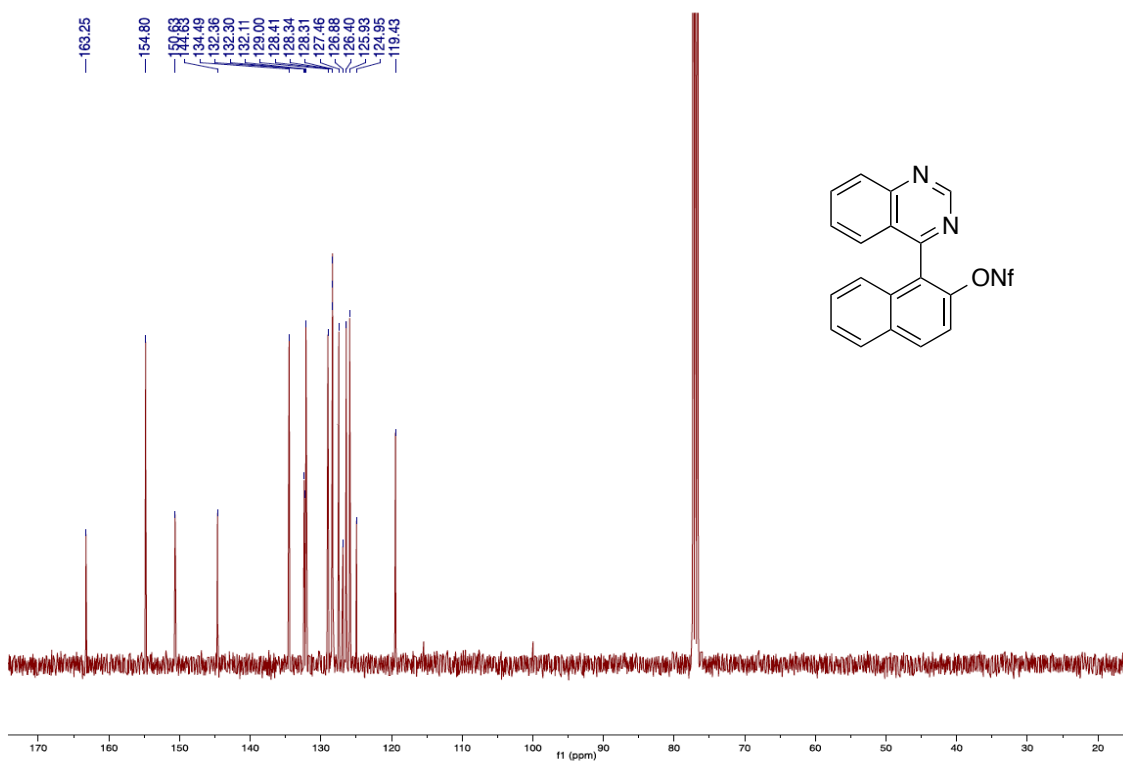

**Figure S5.** <sup>13</sup>C NMR (CDCl<sub>3</sub>, 100 MHz) of (±)-8C



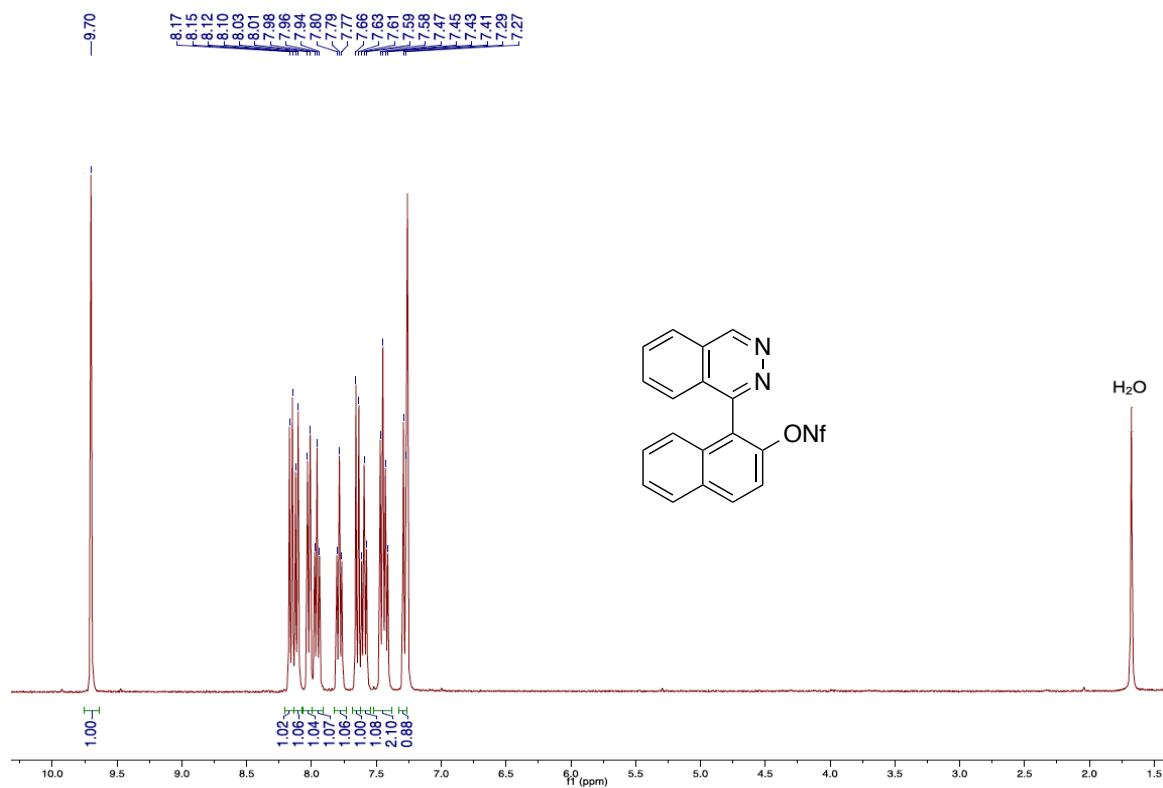

**Figure S6.** <sup>1</sup>H NMR (CDCl<sub>3</sub>, 400 MHz) of (±)-8D

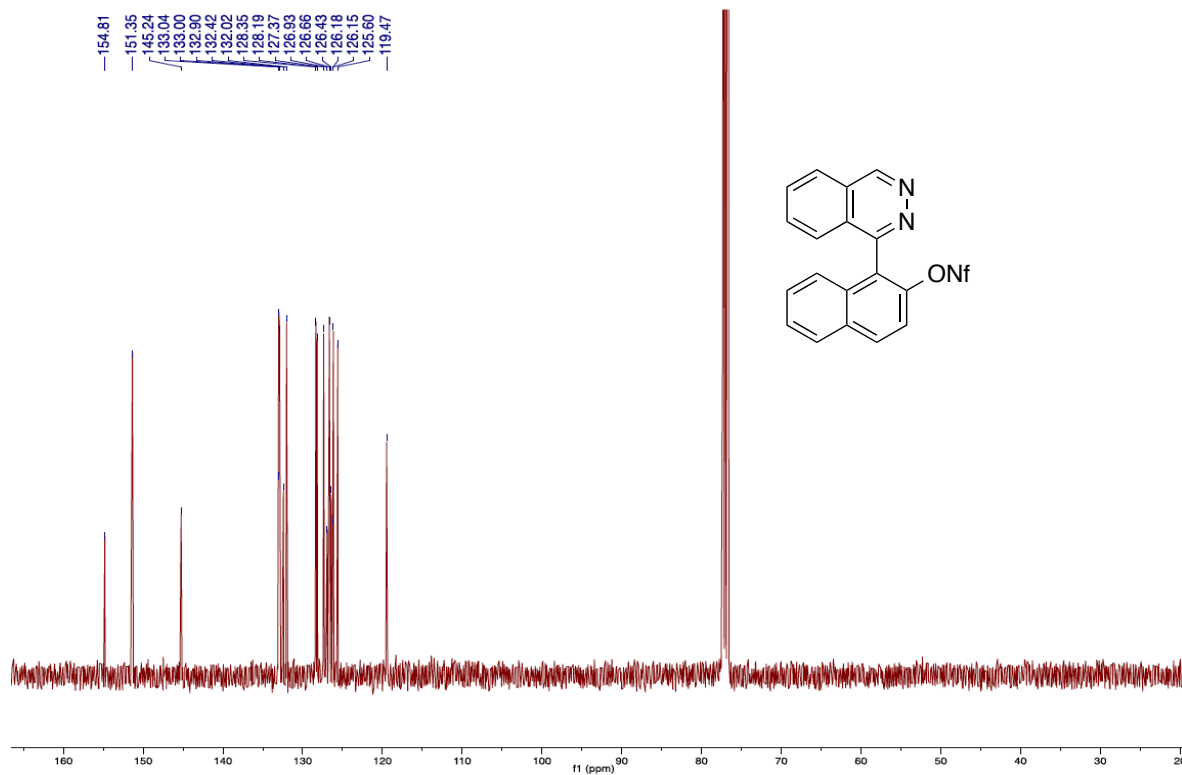

**Figure S7.** <sup>13</sup>C NMR (CDCl<sub>3</sub>, 100 MHz) of (±)-8D

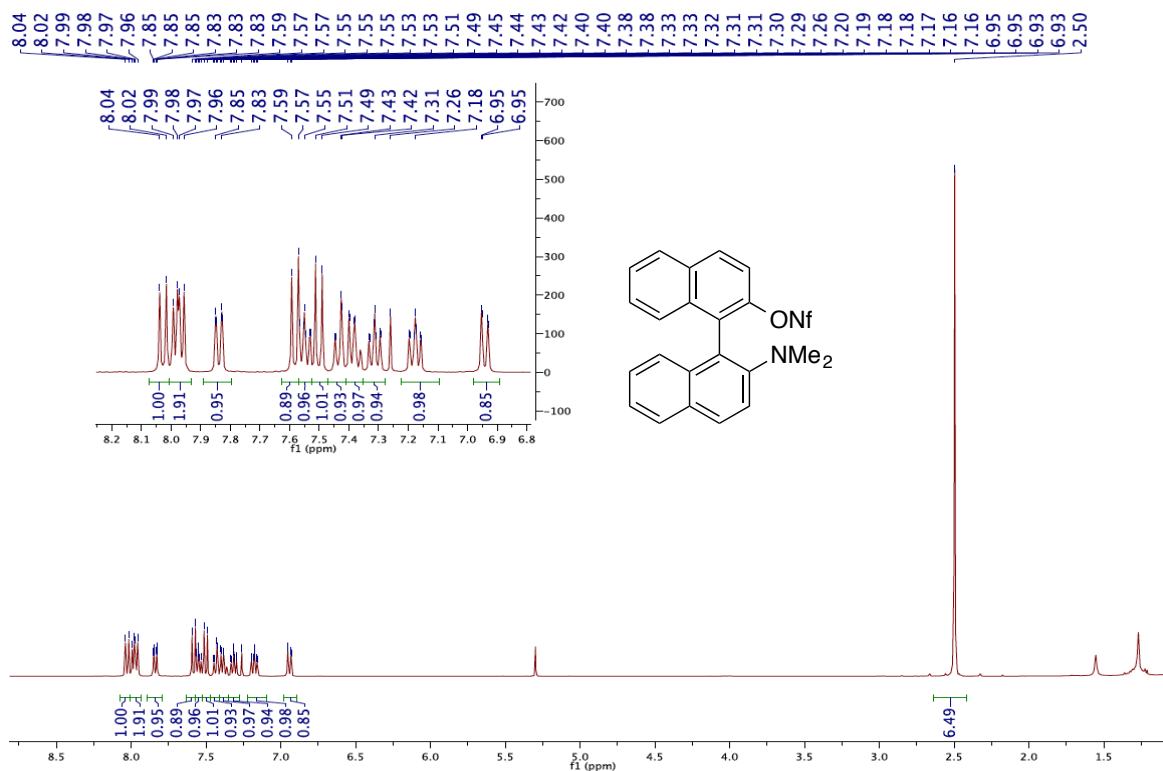

**Figure S8.** <sup>1</sup>H NMR (CDCl<sub>3</sub>, 400 MHz) of (±)-11

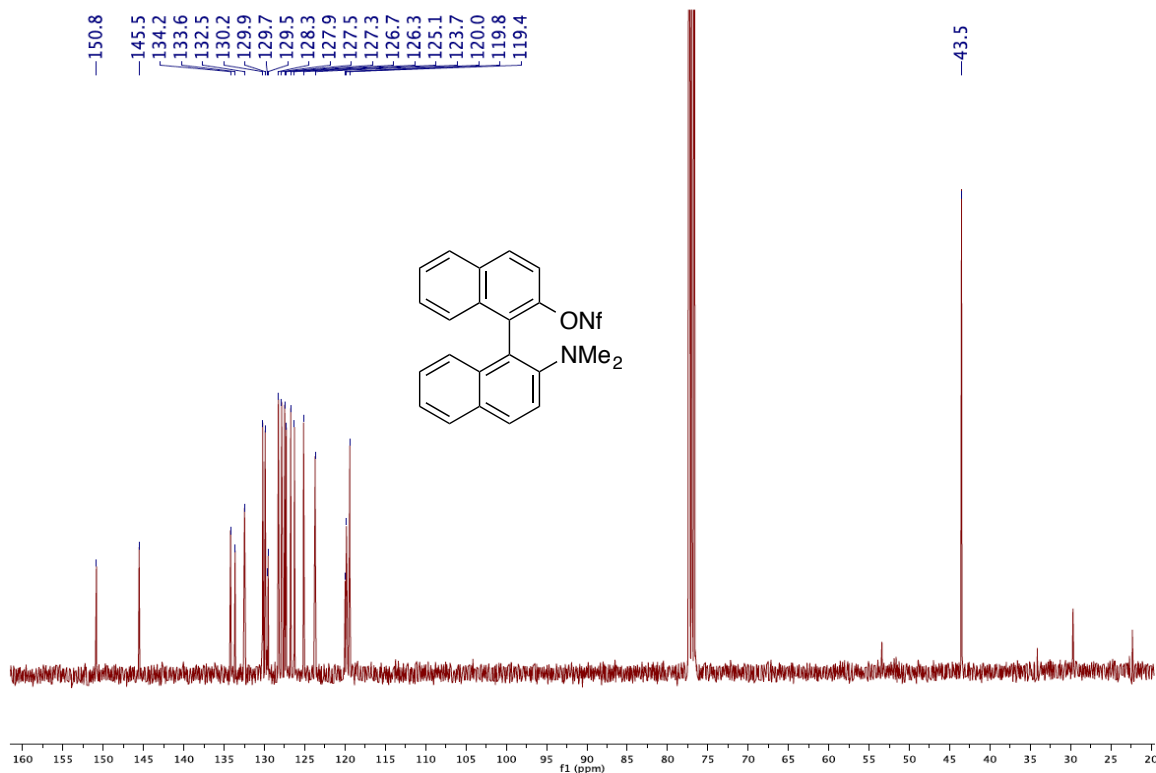

**Figure S9.** <sup>13</sup>C NMR (CDCl<sub>3</sub>, 100 MHz) of (±)-11

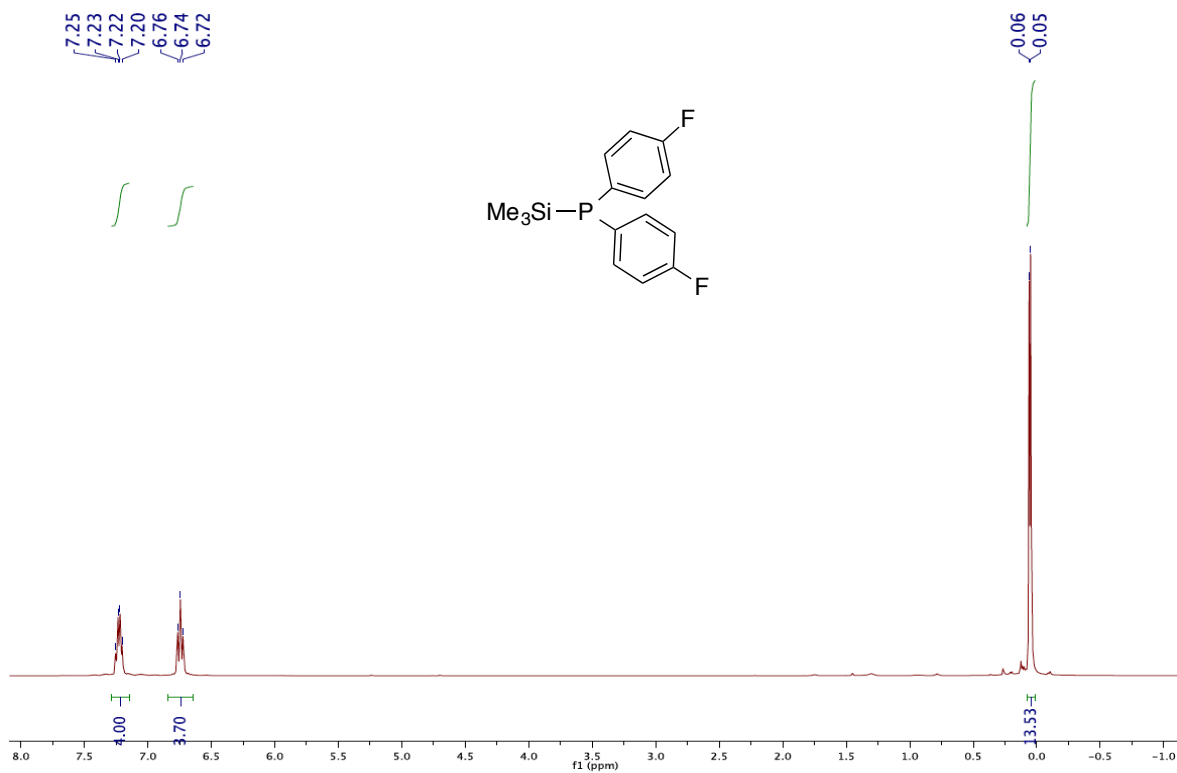

**Figure S10.** <sup>1</sup>H NMR (400 MHz, C<sub>6</sub>D<sub>6</sub>) of **5b**

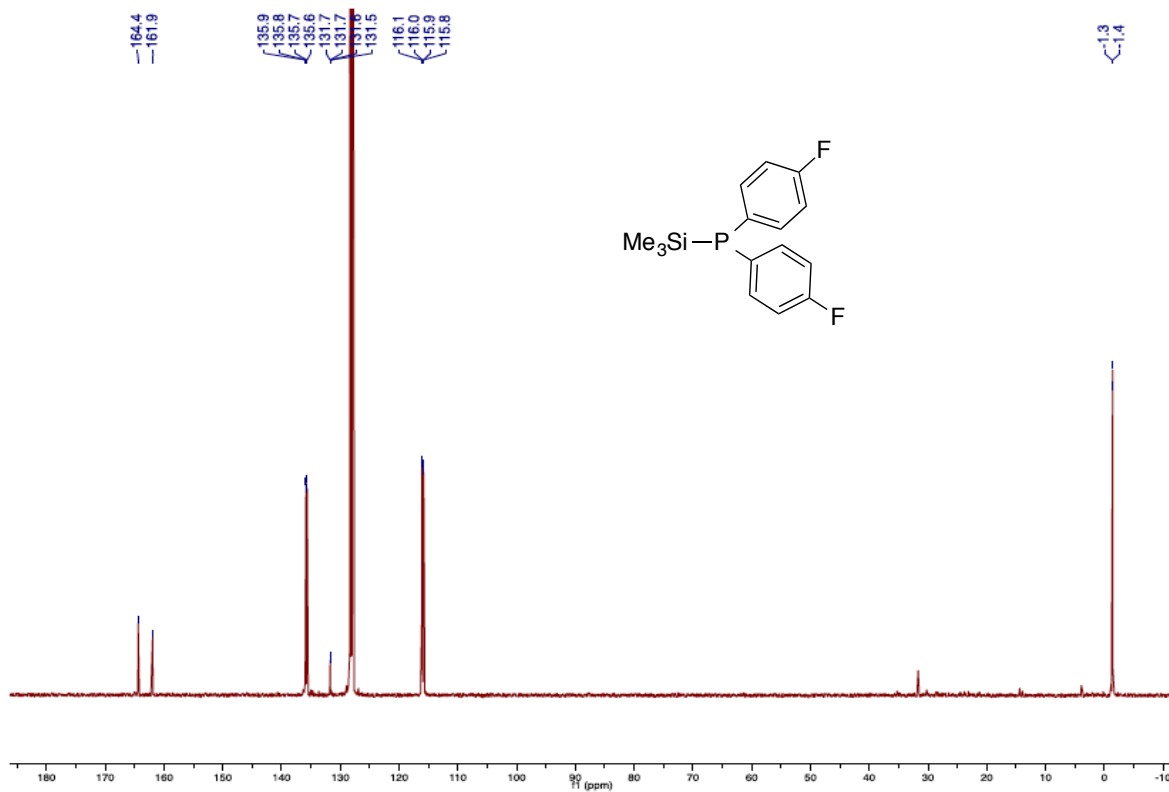

**Figure S11.** <sup>13</sup>C NMR (100 MHz, C<sub>6</sub>D<sub>6</sub>) of **5b**

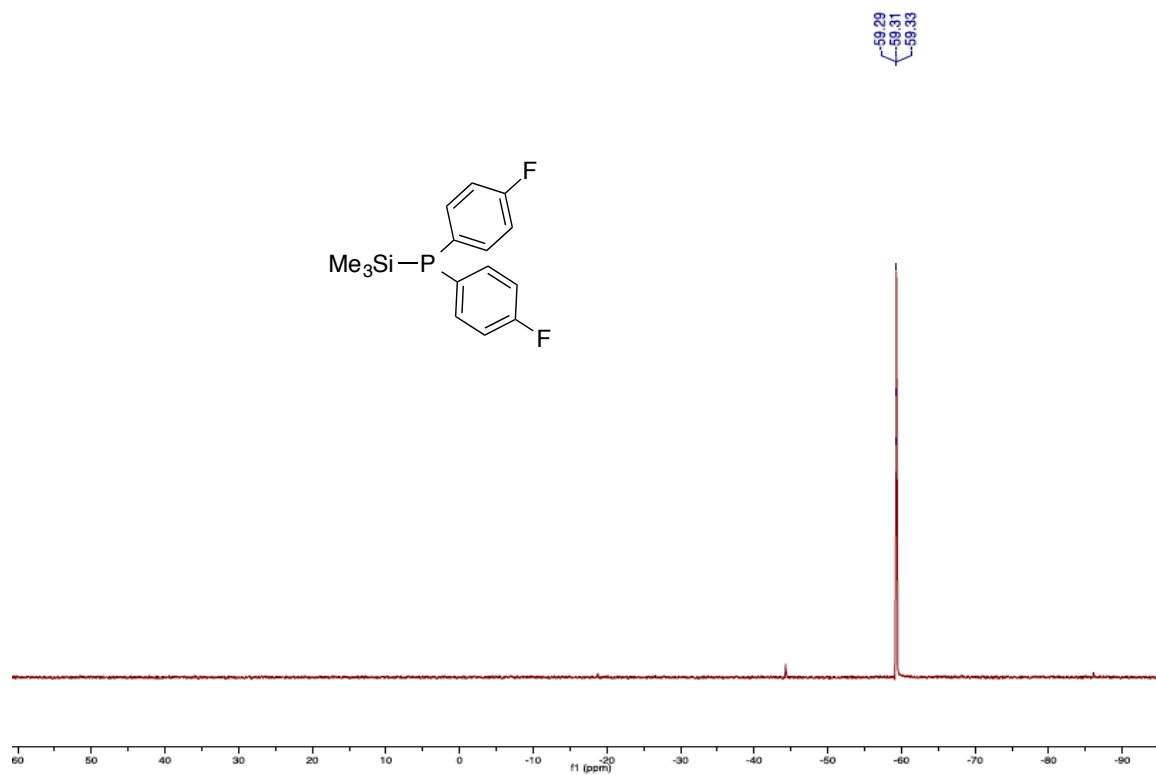

**Figure S12.** <sup>31</sup>P NMR (161 MHz, C<sub>6</sub>D<sub>6</sub>) of 5b

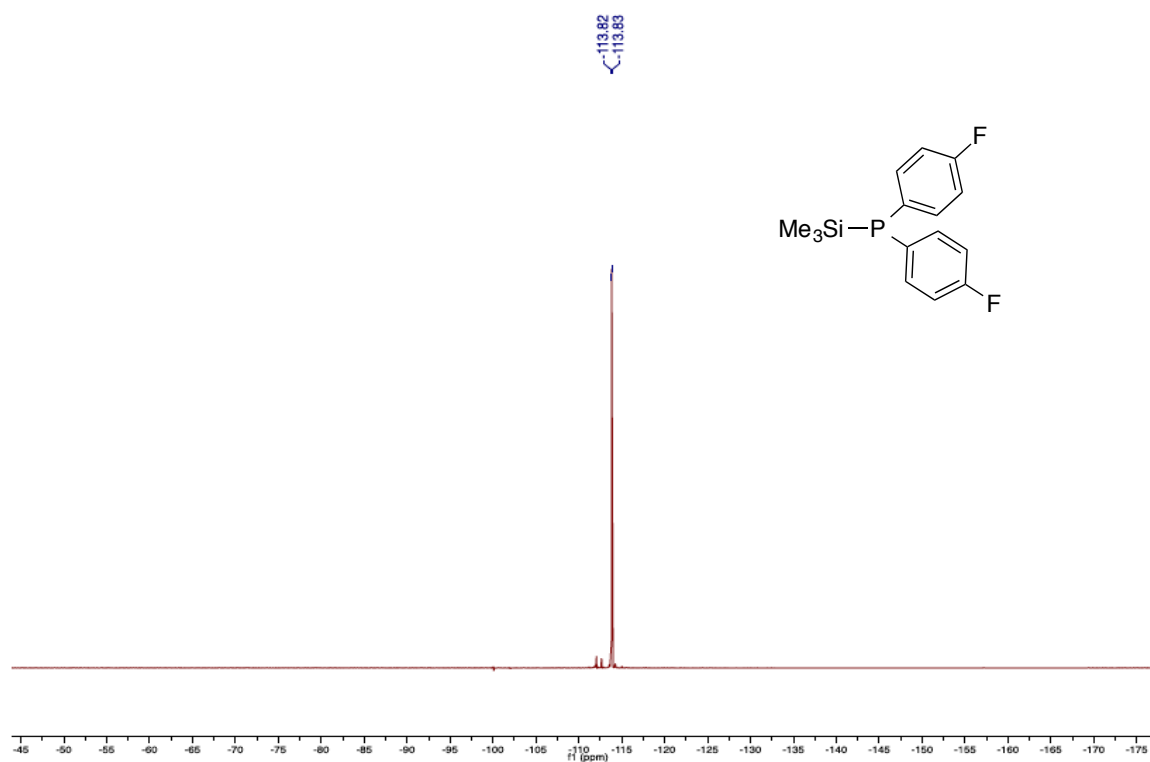

**Figure S13.** <sup>19</sup>F NMR (377 MHz, C<sub>6</sub>D<sub>6</sub>) of 5b

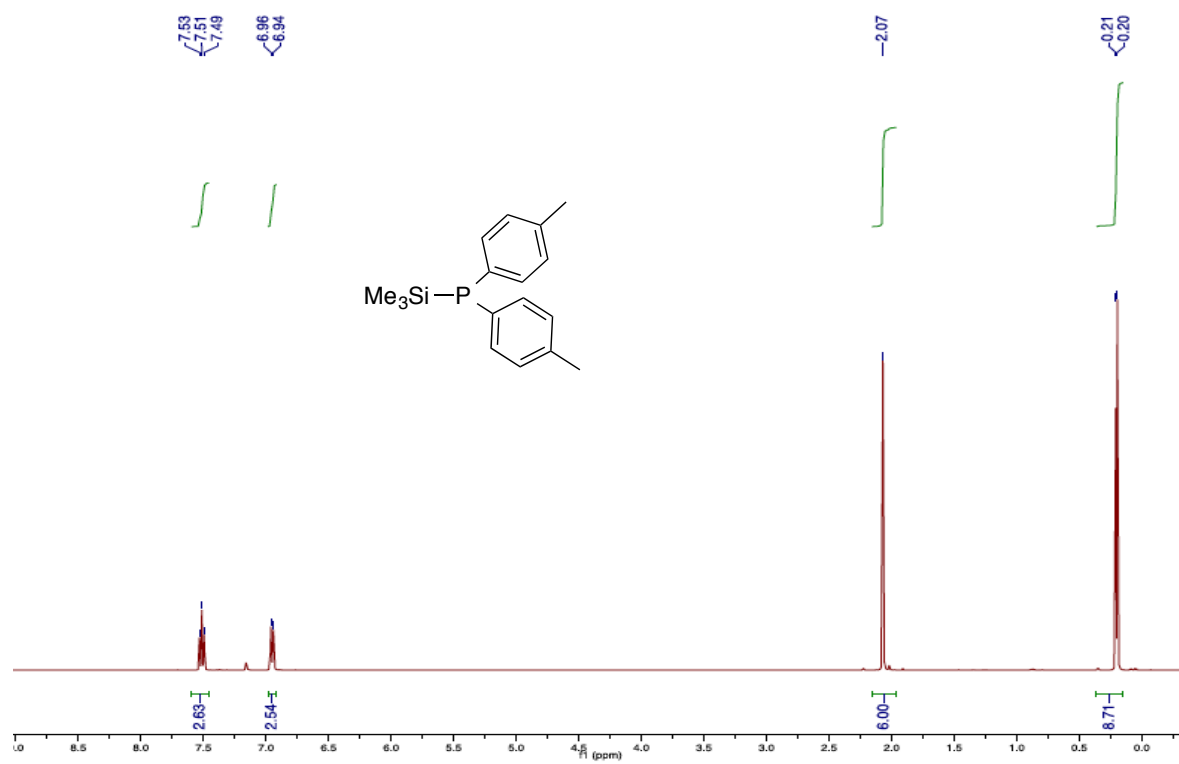

**Figure S14.** <sup>1</sup>H NMR (400 MHz, C<sub>6</sub>D<sub>6</sub>) of **5c**

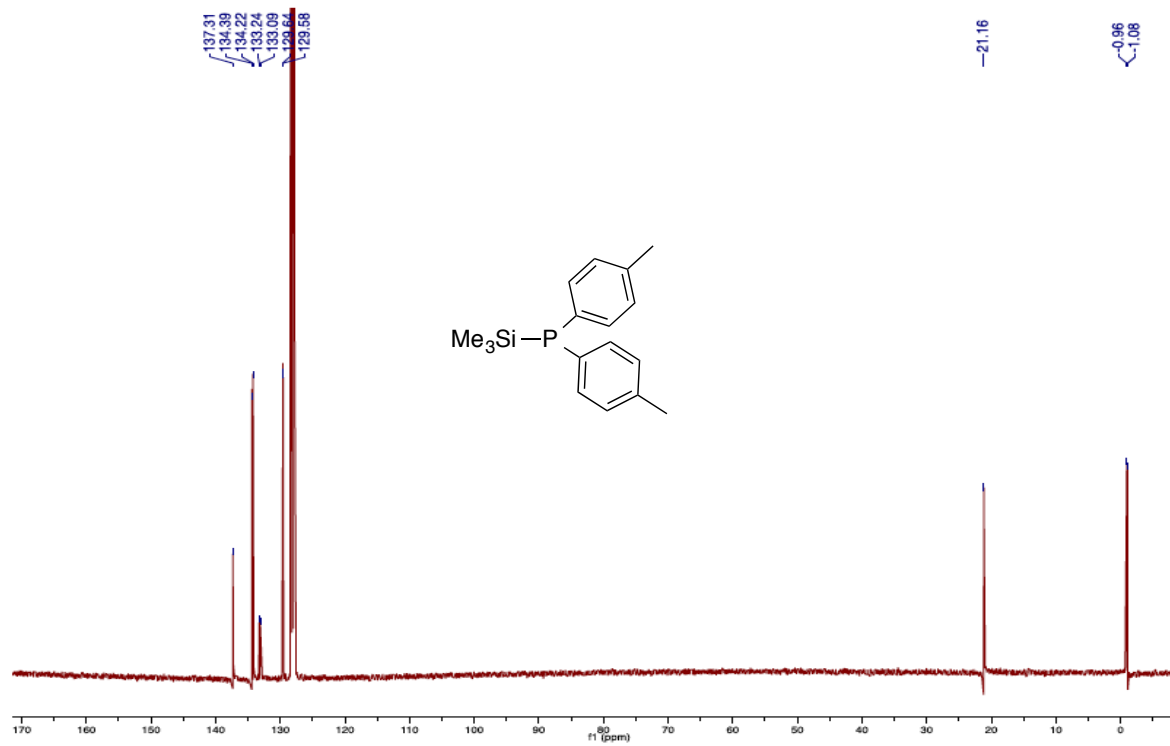

**Figure S15.** <sup>13</sup>C NMR (100 MHz, C<sub>6</sub>D<sub>6</sub>) of **5c**

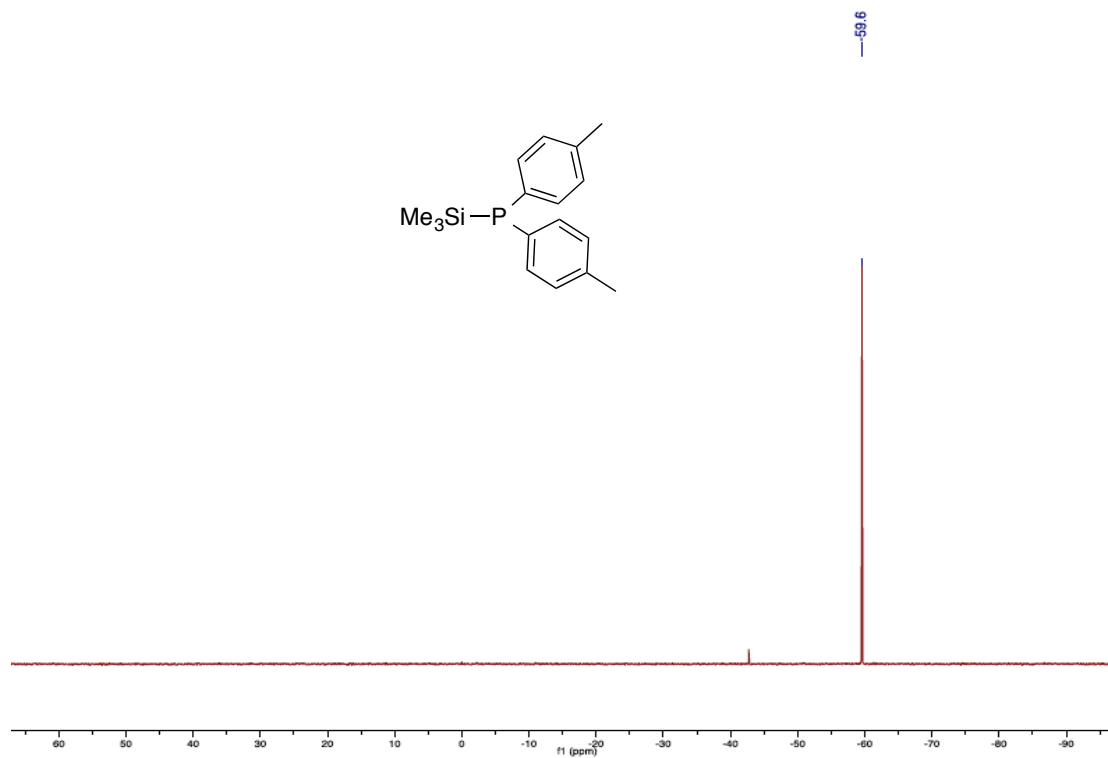

**Figure S16.**  $^{31}\text{P}$  NMR (161 MHz,  $\text{C}_6\text{D}_6$ ) of **5c**

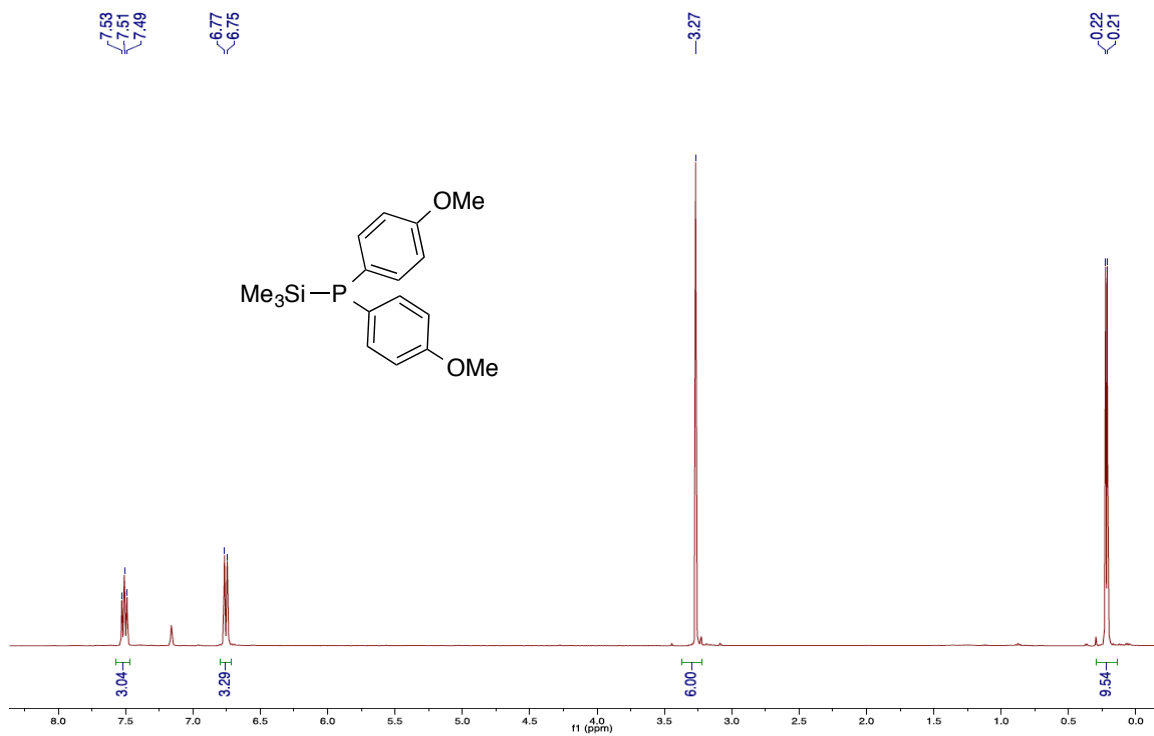

**Figure S17.** <sup>1</sup>H NMR (400 MHz, C<sub>6</sub>D<sub>6</sub>) of **5d**

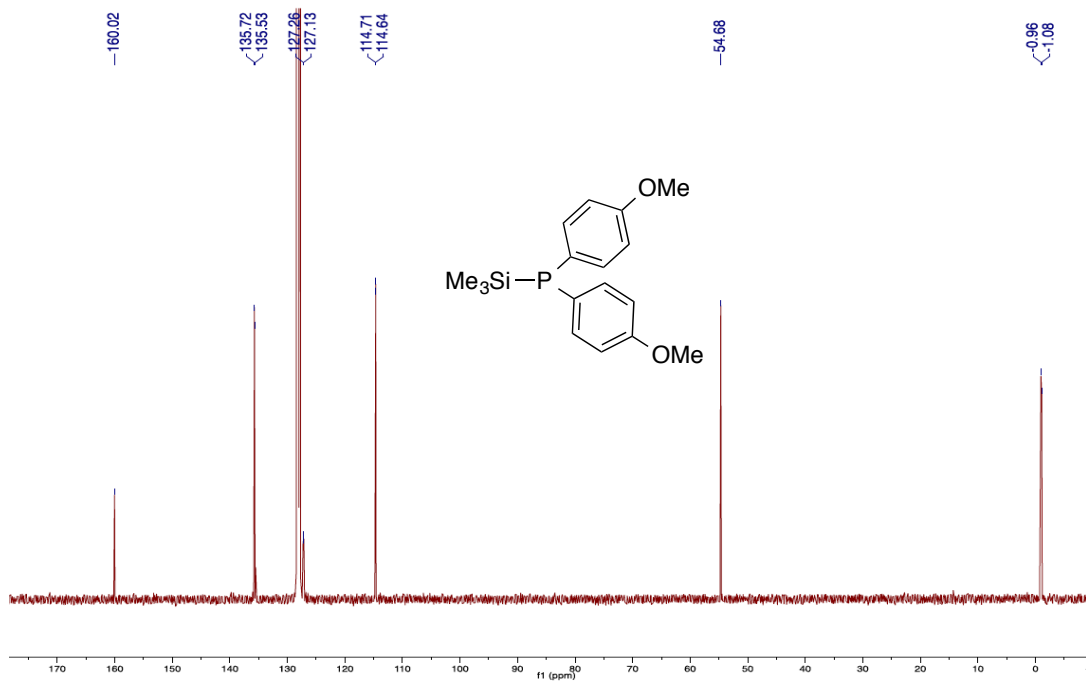

**Figure S18.** <sup>13</sup>C NMR (100 MHz, C<sub>6</sub>D<sub>6</sub>) of **5d**

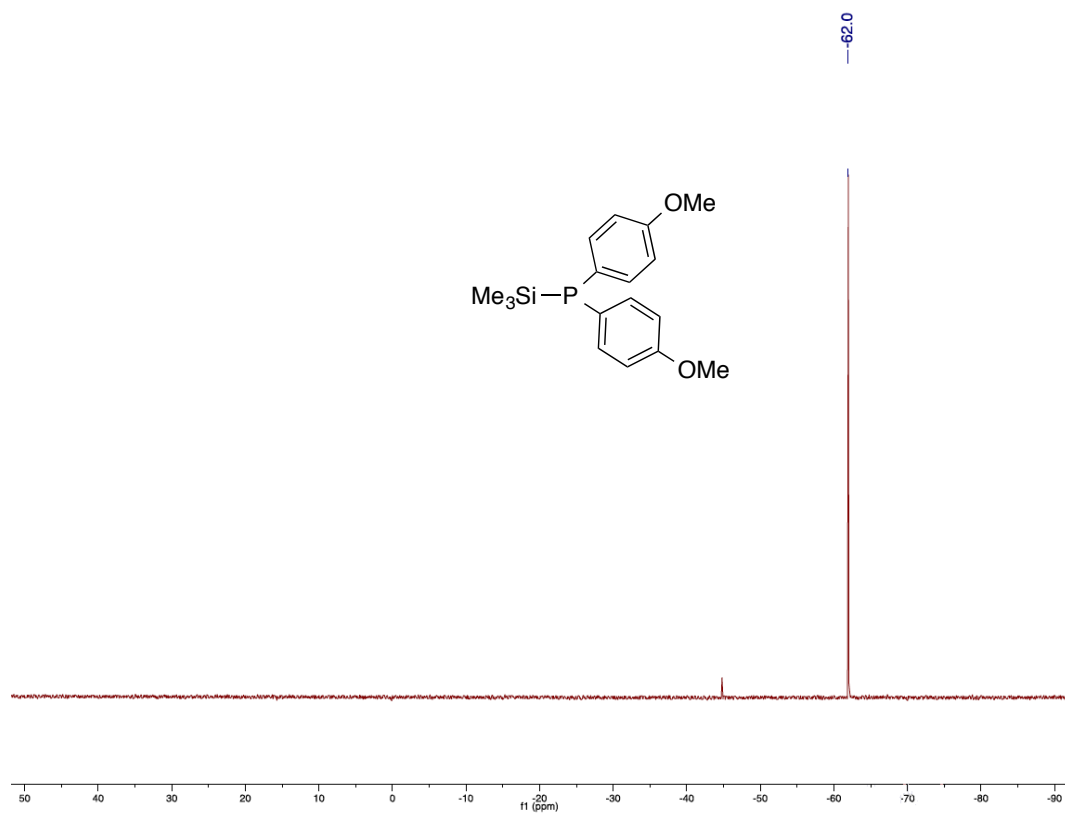

**Figure S19.**  $^{31}\text{P}$  NMR (161 MHz,  $\text{C}_6\text{D}_6$ ) of **5d**



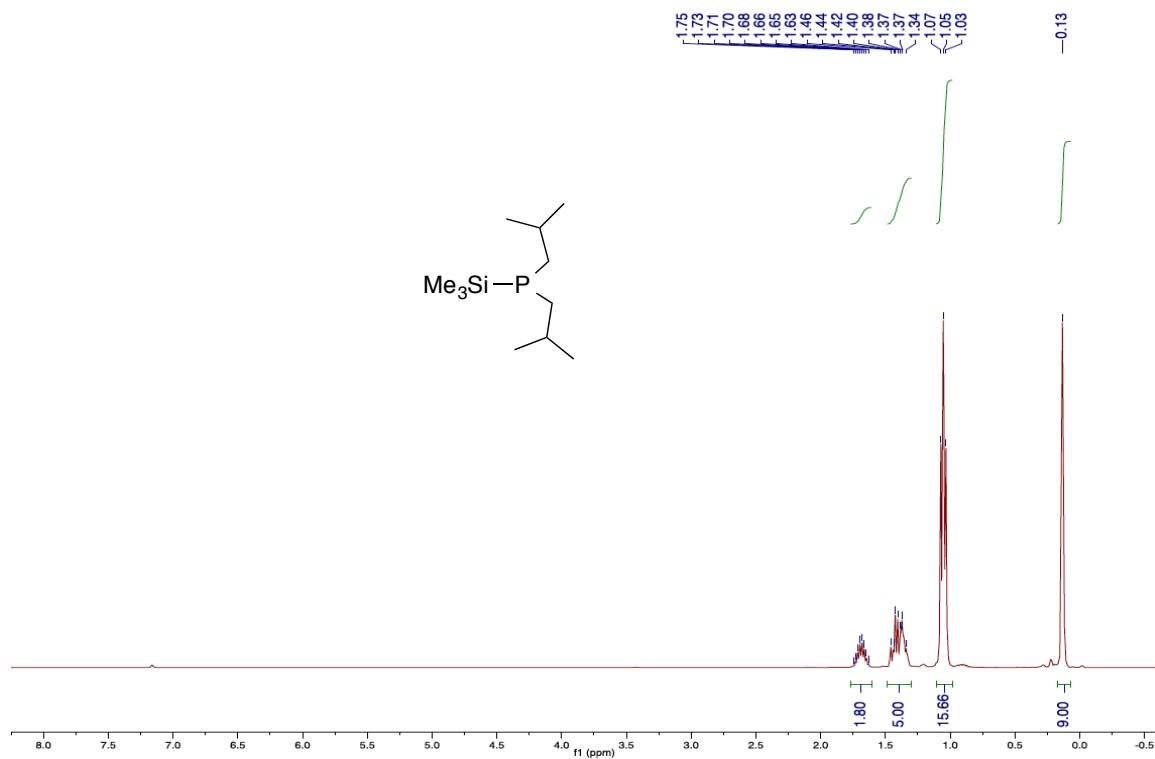

**Figure S20.** <sup>1</sup>H NMR (400 MHz, C<sub>6</sub>D<sub>6</sub>) of 5e

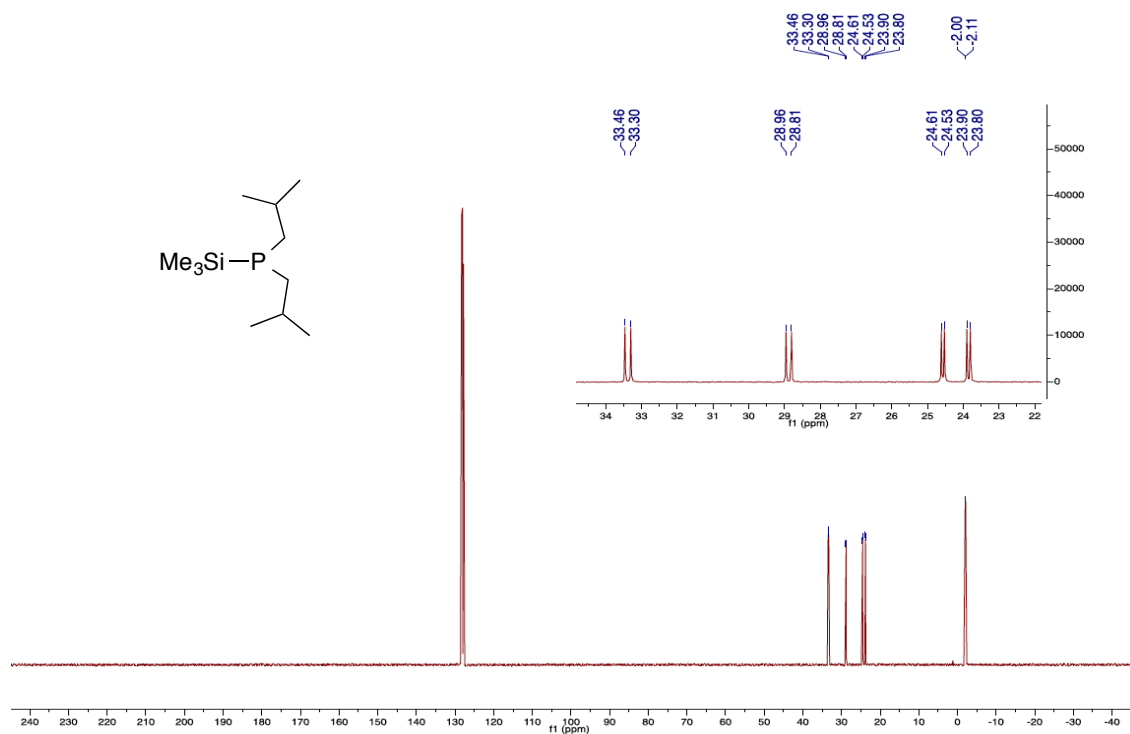

**Figure S21.** <sup>13</sup>C NMR (100 MHz, C<sub>6</sub>D<sub>6</sub>) of 5e

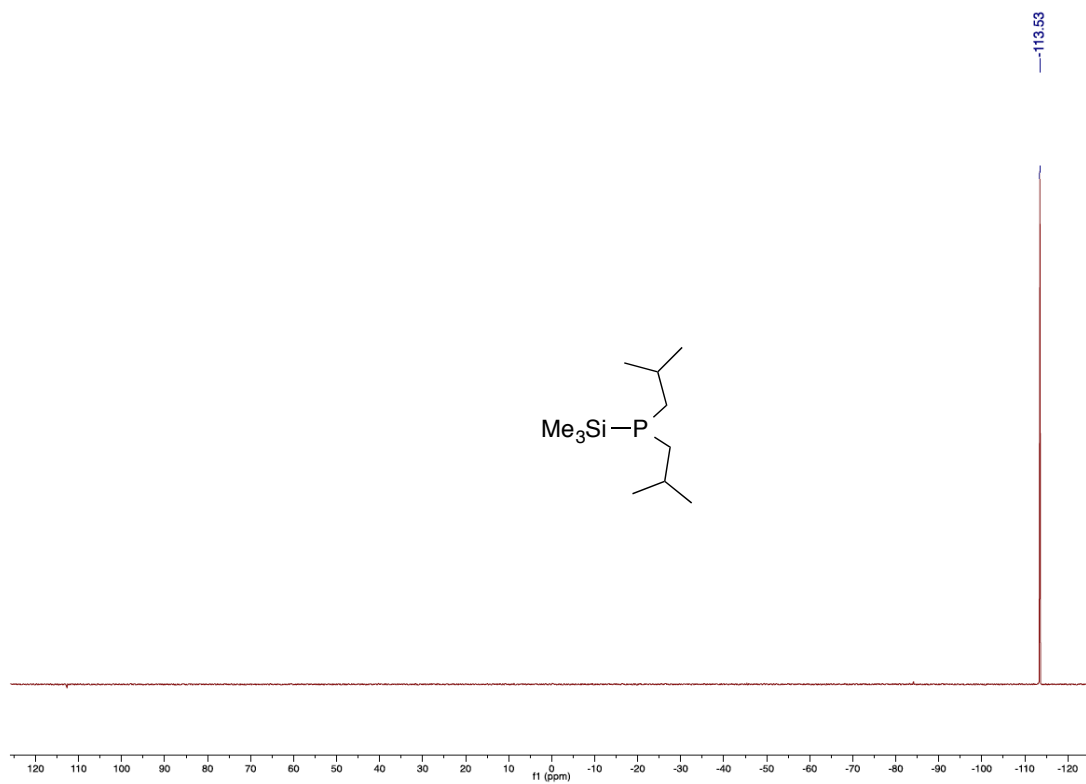

**Figure S22.**  $^{31}\text{P}$  NMR (161 MHz,  $\text{C}_6\text{D}_6$ ) of 5e

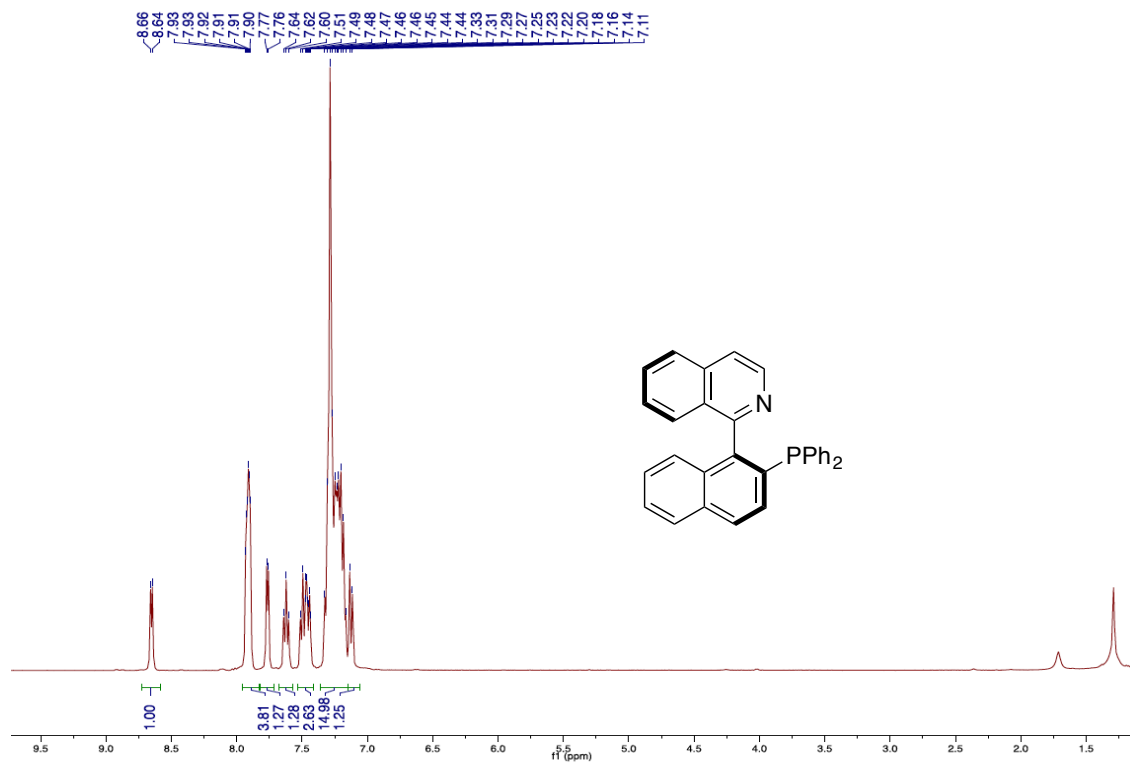

**Figure S23.** <sup>1</sup>H NMR (400 MHz, CDCl<sub>3</sub>) of (S)-3Aa

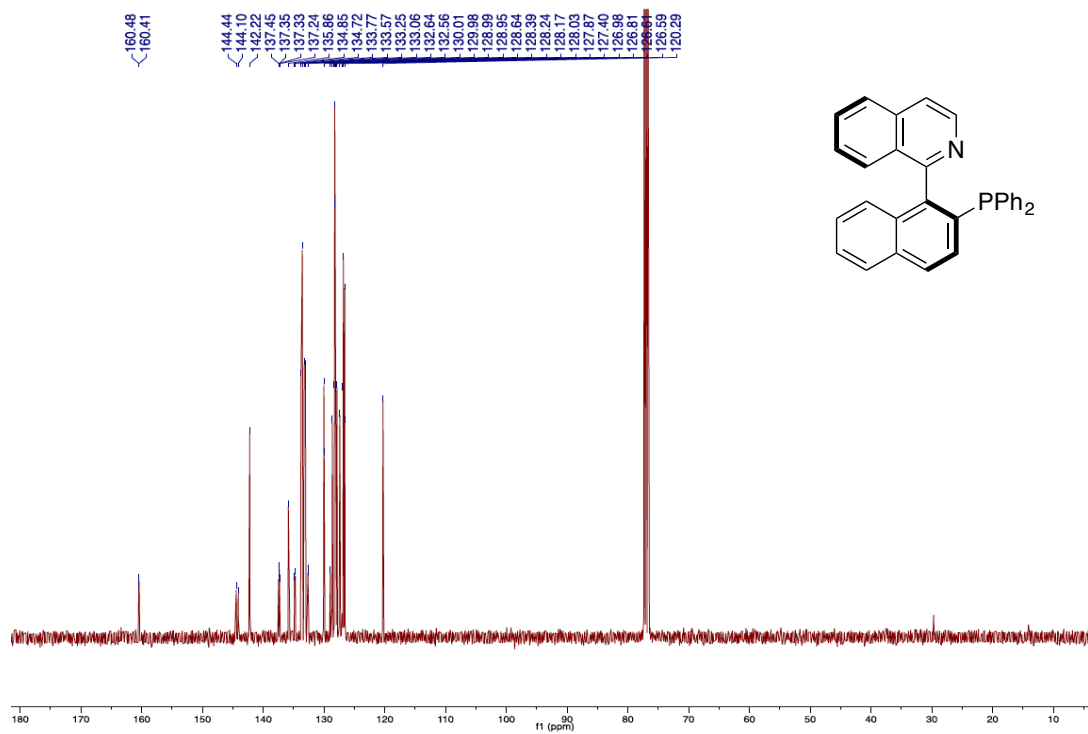

**Figure S24.** <sup>13</sup>C NMR (100 MHz, CDCl<sub>3</sub>) of (S)-3Aa

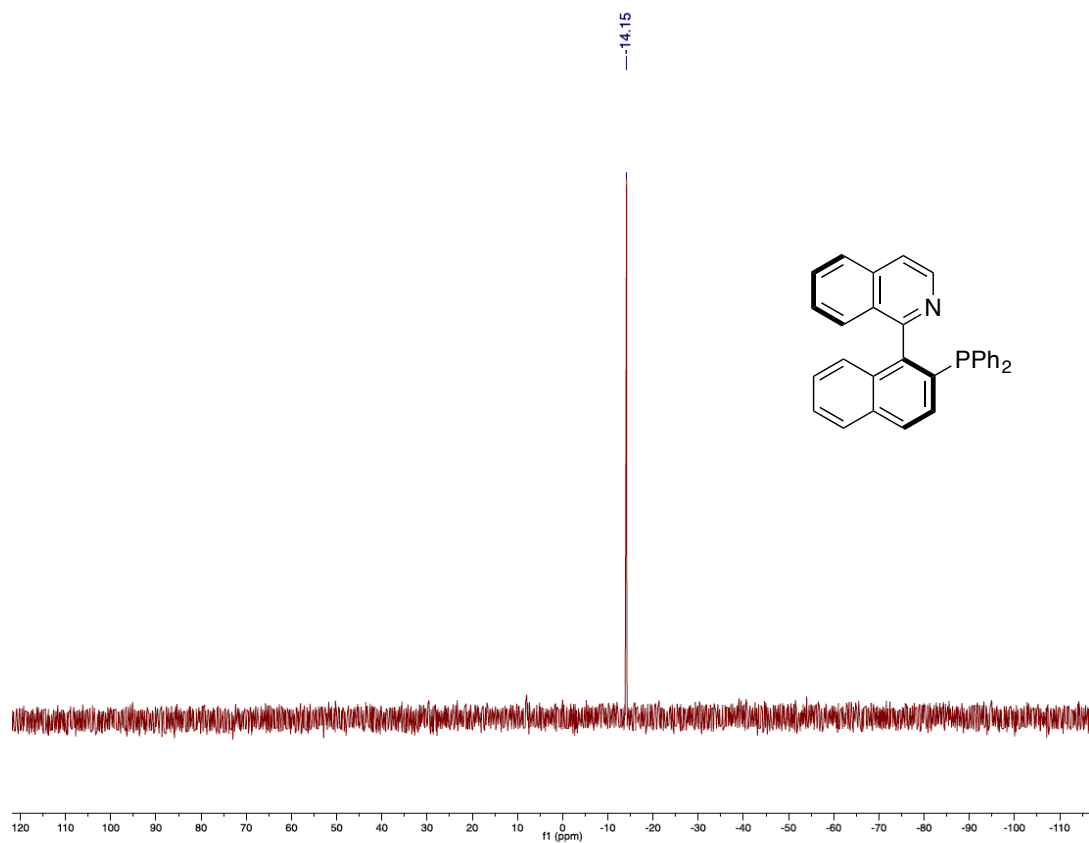

**Figure S25.**  $^{31}\text{P}$  NMR (161 MHz,  $\text{CDCl}_3$ ) of (*S*)-3Aa

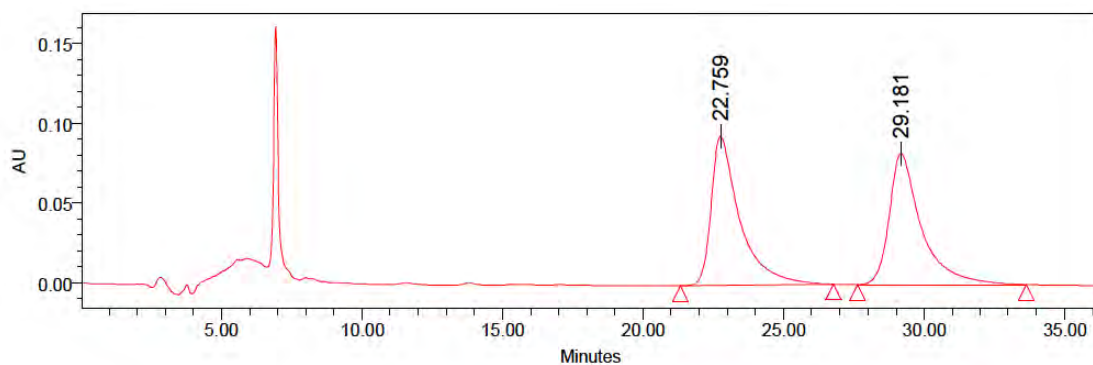

|   | Processed Channel | Retention Time (min) | Area    | % Area | Height |
|---|-------------------|----------------------|---------|--------|--------|
| 1 | PDA 228.5 nm      | 22.759               | 6609456 | 50.29  | 93386  |
| 2 | PDA 228.5 nm      | 29.181               | 6532200 | 49.71  | 82031  |

**Figure S26. Phosphine oxide racemic sample:** IA column, Hex:Isop 85:15, T= 30°C, F= 1mL/min.

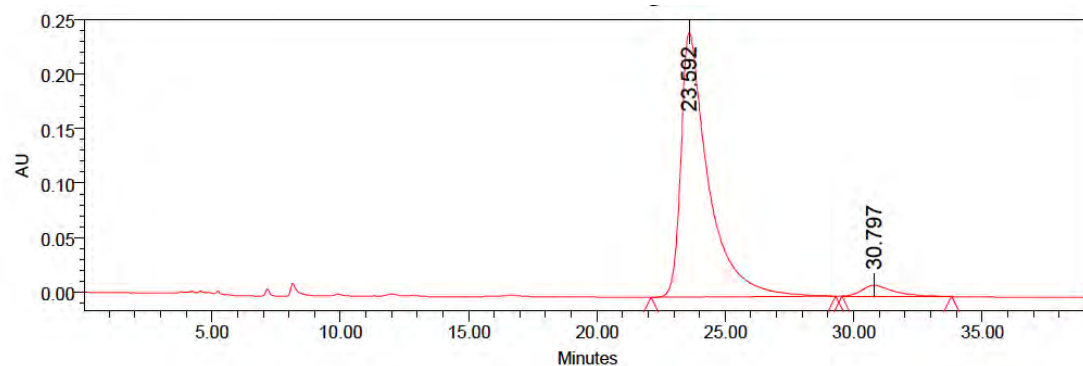

|   | Processed Channel | Retention Time (min) | Area     | % Area | Height |
|---|-------------------|----------------------|----------|--------|--------|
| 1 | PDA 228.5 nm      | 23.592               | 17977575 | 95.53  | 242809 |
| 2 | PDA 228.5 nm      | 30.797               | 840444   | 4.47   | 10000  |

**Figure S27. Phosphine oxide enantioriched sample:** er 95.5:4.5.

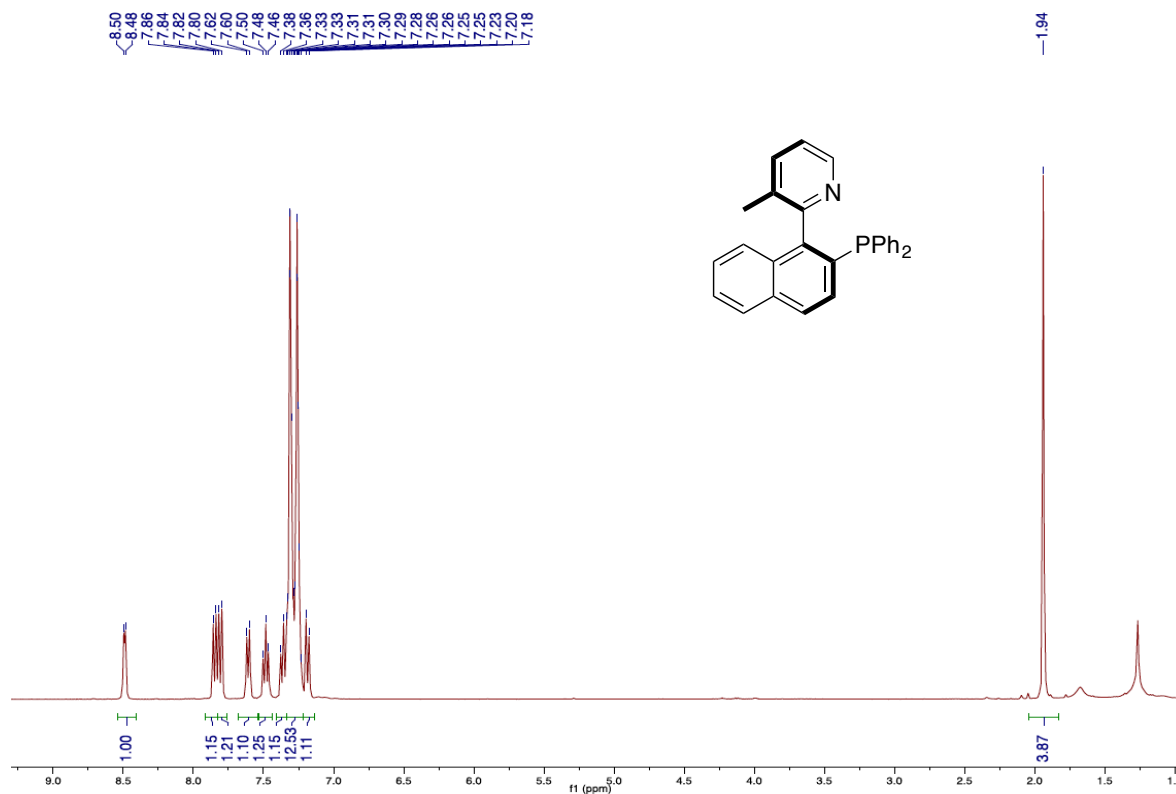

**Figure S28.** <sup>1</sup>H NMR (400 MHz, CDCl<sub>3</sub>) of (S)-3Ba

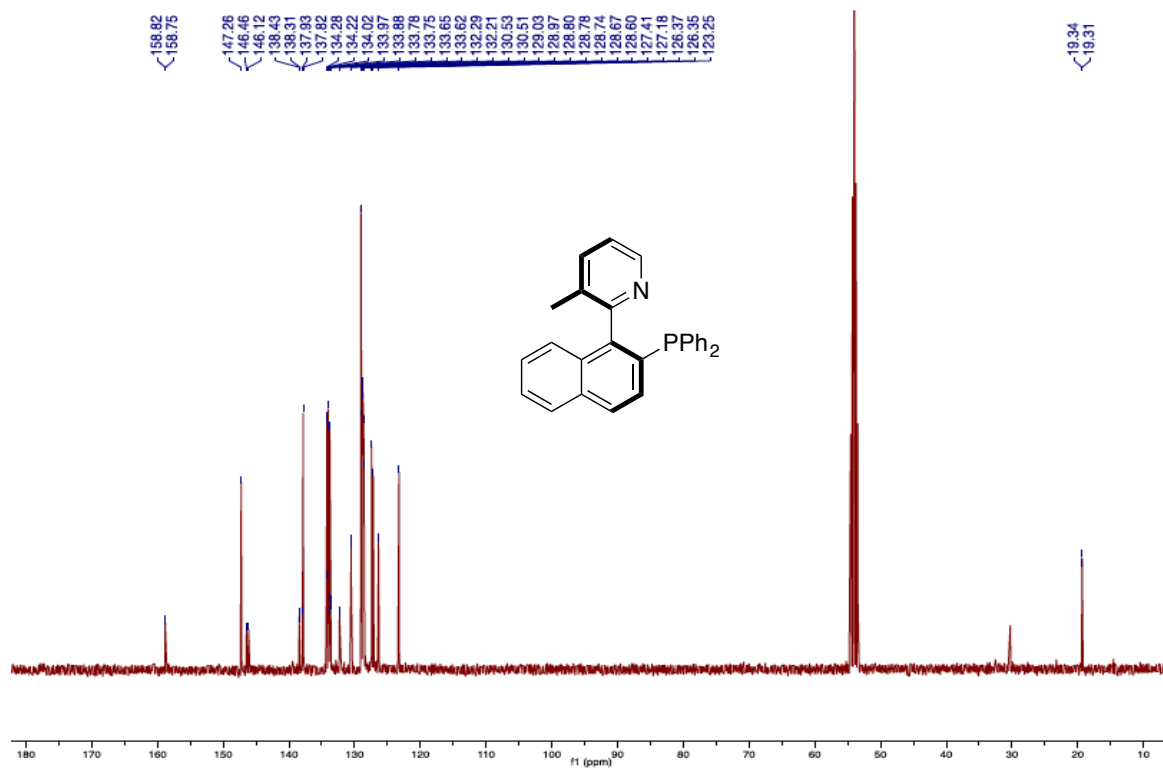

**Figure S29.** <sup>13</sup>C NMR (100 MHz, CD<sub>2</sub>Cl<sub>2</sub>) of (S)-3Ba

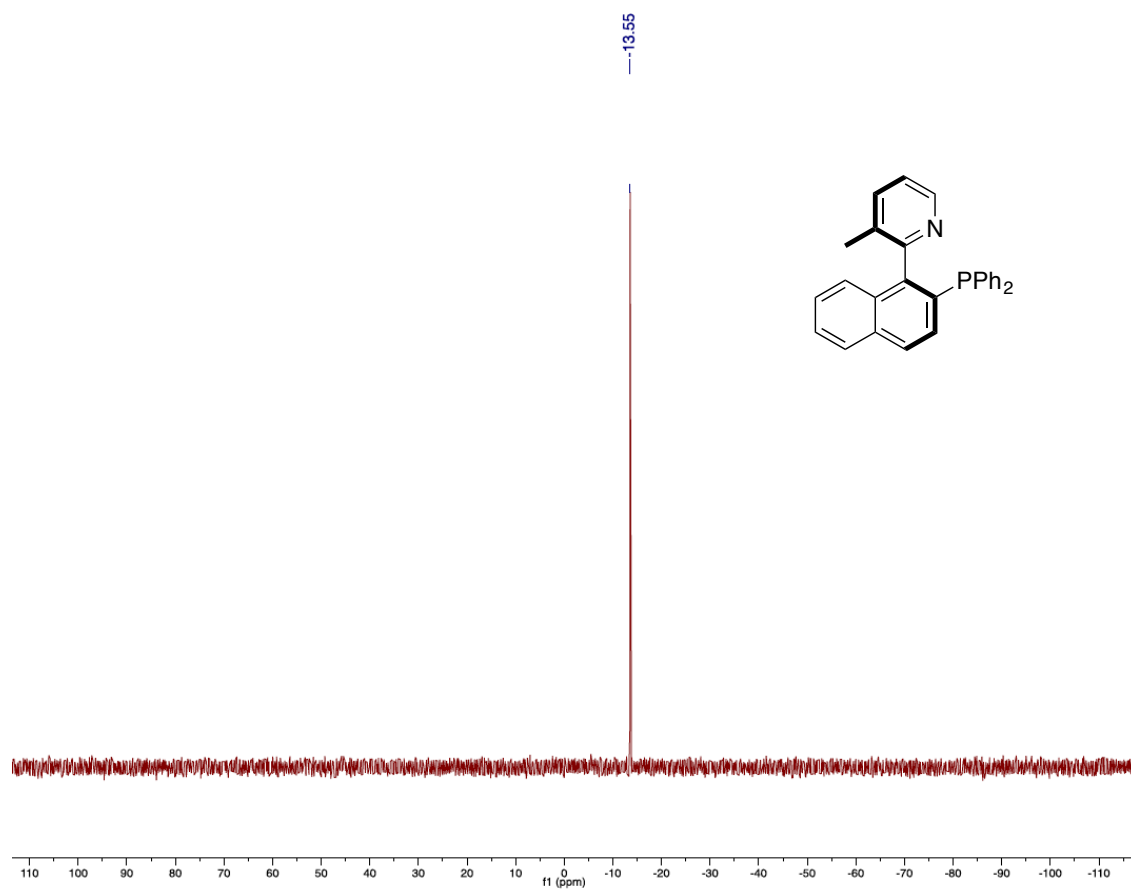

**Figure S30.**  $^{31}\text{P}$  NMR (161 MHz,  $\text{CDCl}_3$ ) of **(S)-3Ba**

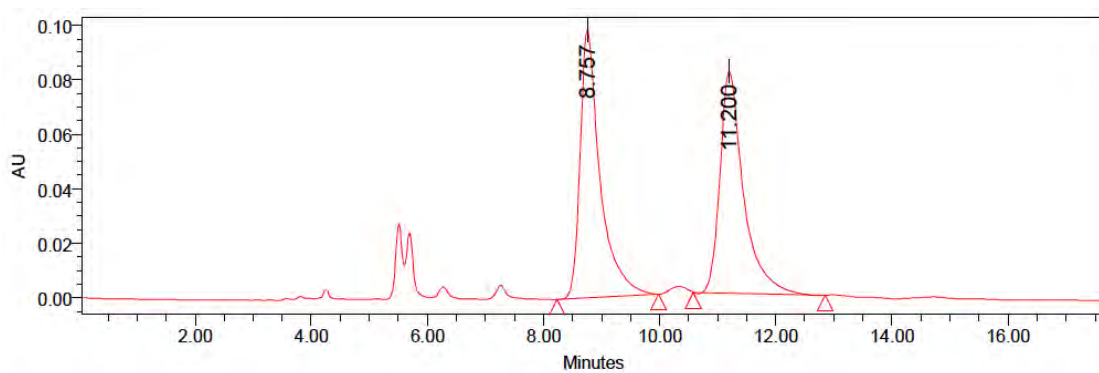

|   | Processed Channel | Retention Time (min) | Area    | % Area | Height |
|---|-------------------|----------------------|---------|--------|--------|
| 1 | PDA 235.6 nm      | 8.757                | 2352809 | 50.63  | 98419  |
| 2 | PDA 235.6 nm      | 11.200               | 2294466 | 49.37  | 81592  |

**Figure S31. Phosphine oxide racemic sample:** IA column, Hex:Isop 75:25, T= 30°C, F= 1mL/min.

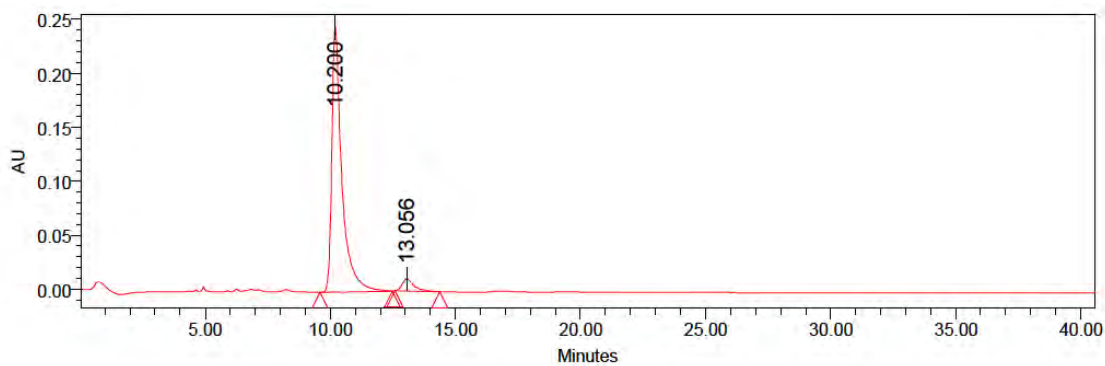

|   | Processed Channel | Retention Time (min) | Area    | % Area | Height |
|---|-------------------|----------------------|---------|--------|--------|
| 1 | PDA 235.6 nm      | 10.200               | 6844888 | 95.00  | 245129 |
| 2 | PDA 235.6 nm      | 13.056               | 360609  | 5.00   | 11078  |

**Figure S32. Phosphine oxide enantioriched sample:** er 95:5.



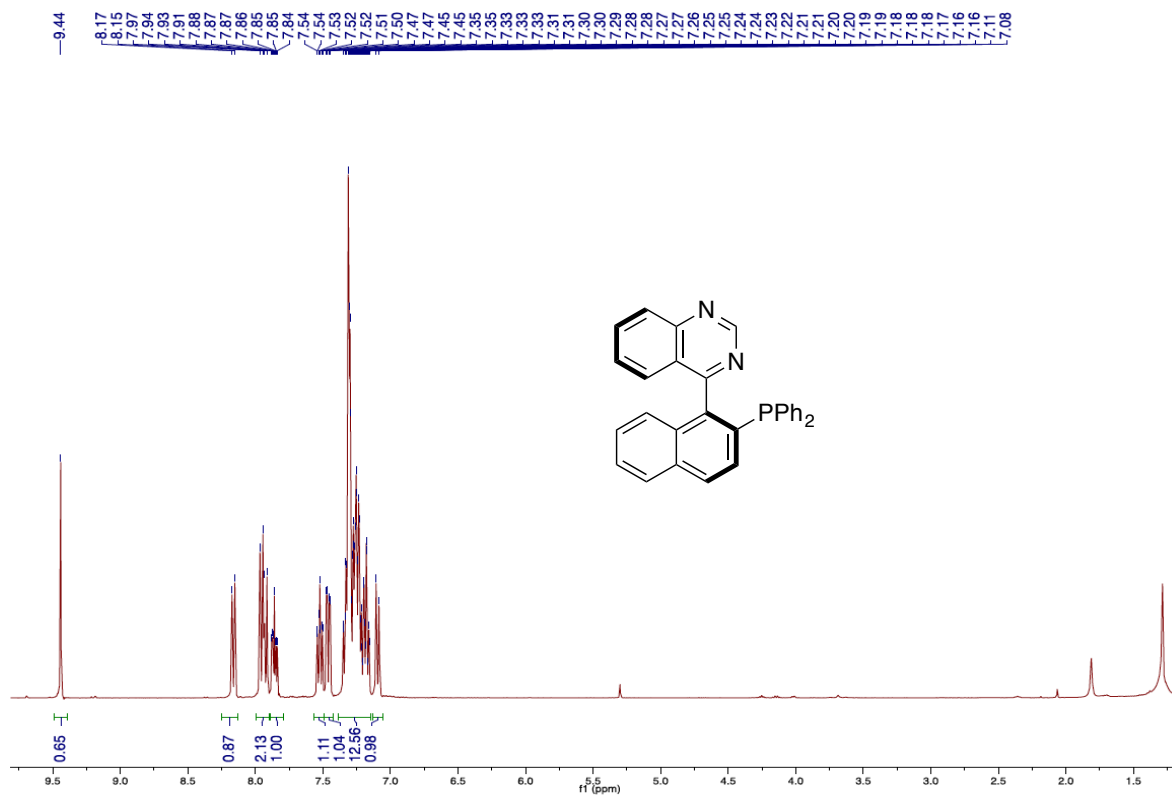

**Figure S33.** <sup>1</sup>H NMR (400 MHz, CDCl<sub>3</sub>) of (*S*)-3Ca

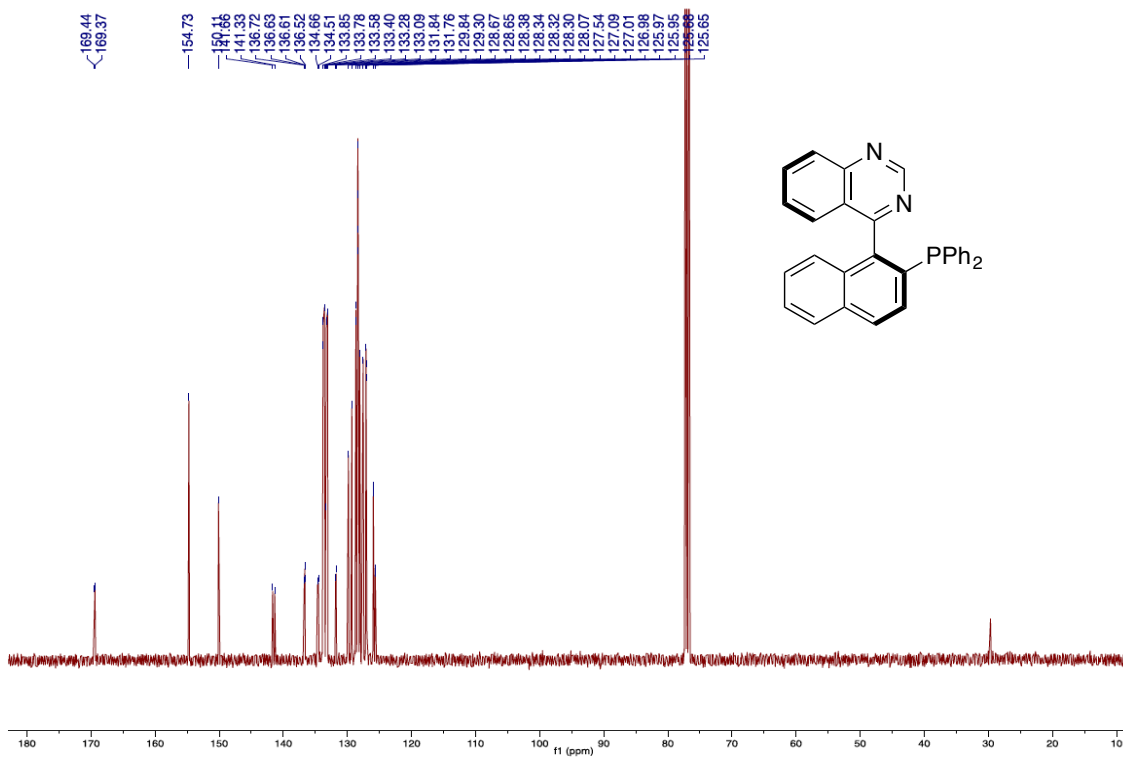

**Figure S34.** <sup>13</sup>C NMR (100 MHz, CDCl<sub>3</sub>) of (*S*)-3Ca

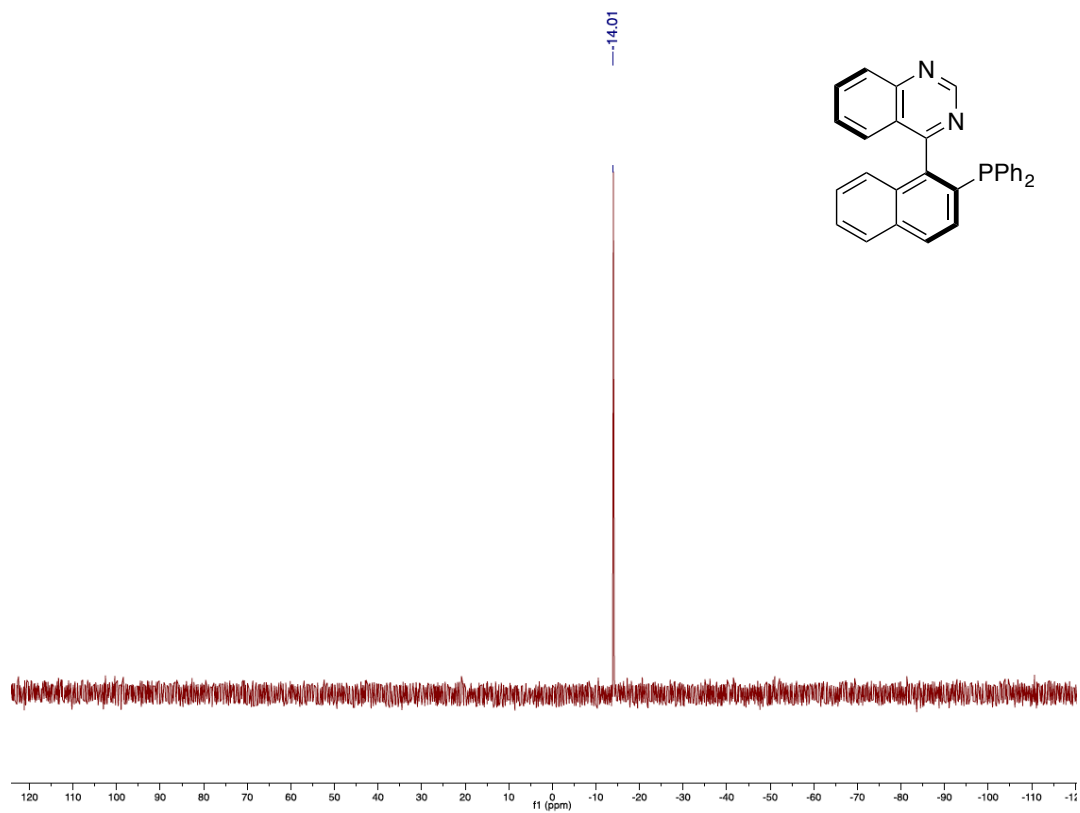

**Figure S35.**  $^{31}\text{P}$  NMR (161 MHz,  $\text{CDCl}_3$ ) of (*S*)-3Ca

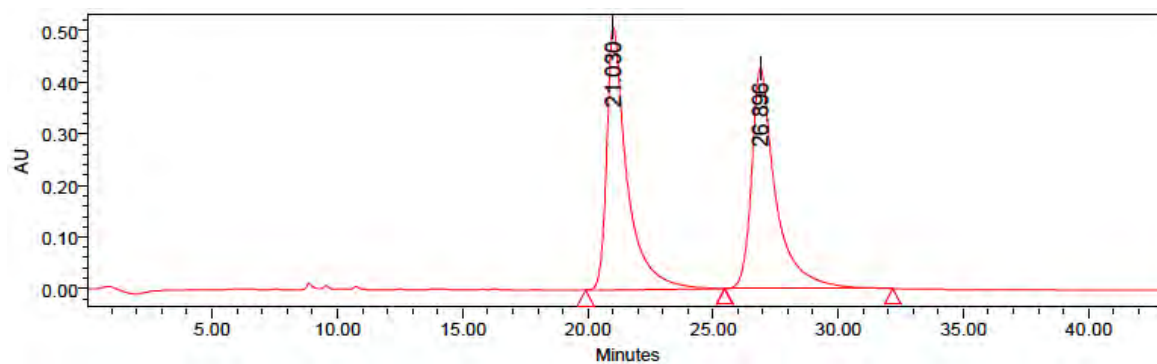

|   | Processed Channel | Retention Time (min) | Area     | % Area | Height |
|---|-------------------|----------------------|----------|--------|--------|
| 1 | PDA 230.0 nm      | 21.030               | 28698078 | 50.22  | 507467 |
| 2 | PDA 230.0 nm      | 26.896               | 28444144 | 49.78  | 426593 |

**Figure S36. Phosphine oxide racemic sample:** IA column, Hex:Isop 75:25, T= 30°C, F= 1mL/min.

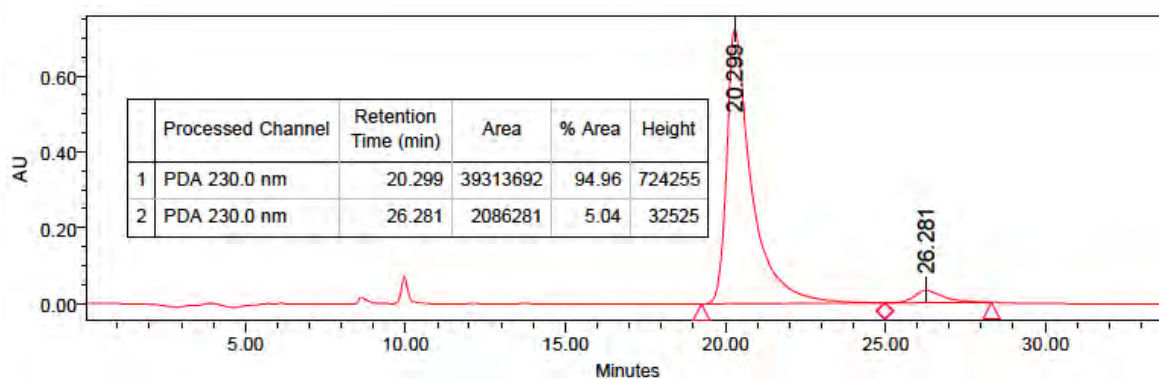

|   | Processed Channel | Retention Time (min) | Area     | % Area | Height |
|---|-------------------|----------------------|----------|--------|--------|
| 1 | PDA 230.0 nm      | 20.299               | 39313692 | 94.96  | 724255 |
| 2 | PDA 230.0 nm      | 26.281               | 2086281  | 5.04   | 32525  |

**Figure S37. Phosphine oxide enantioriched sample:** er 95:5.

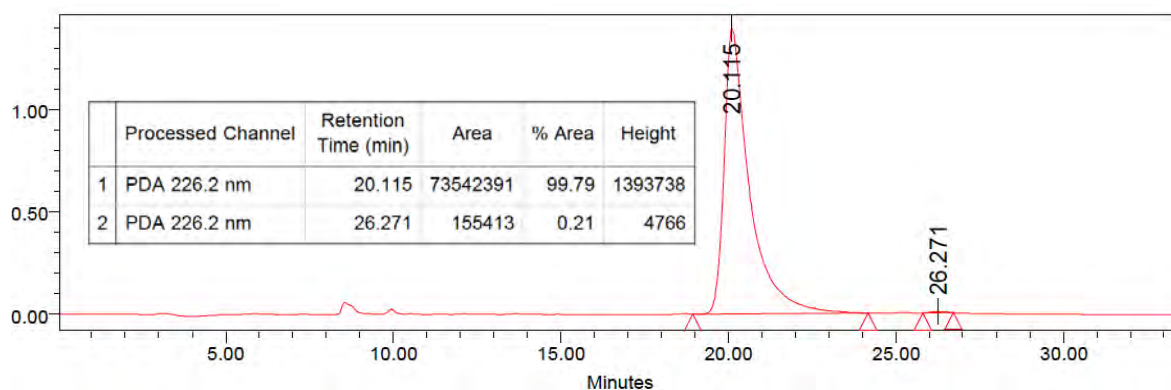

|   | Processed Channel | Retention Time (min) | Area     | % Area | Height  |
|---|-------------------|----------------------|----------|--------|---------|
| 1 | PDA 226.2 nm      | 20.115               | 73542391 | 99.79  | 1393738 |
| 2 | PDA 226.2 nm      | 26.271               | 155413   | 0.21   | 4766    |

**Figure S38. After washing with acetone, er >99:1.**

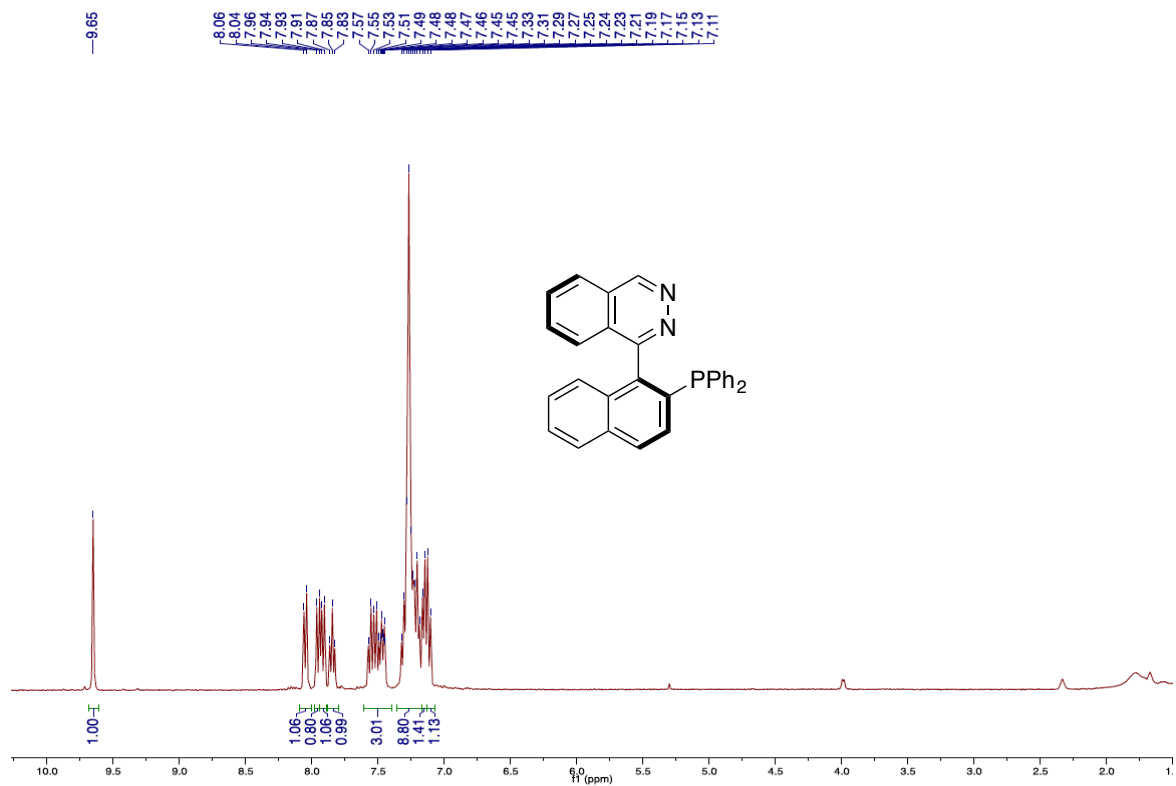

**Figure S39.** <sup>1</sup>H NMR (400 MHz, CDCl<sub>3</sub>) of (*S*)-3Da

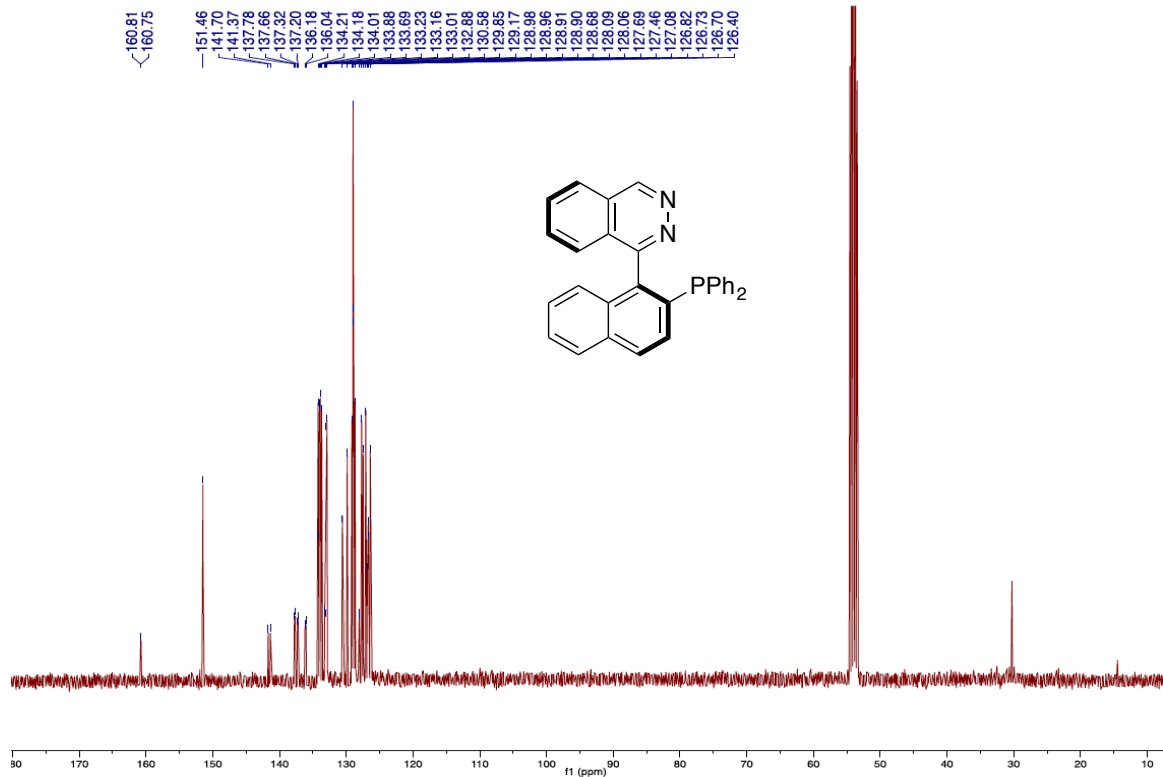

**Figure S40.** <sup>13</sup>C NMR (100 MHz, CD<sub>2</sub>Cl<sub>2</sub>) of (*S*)-3Da

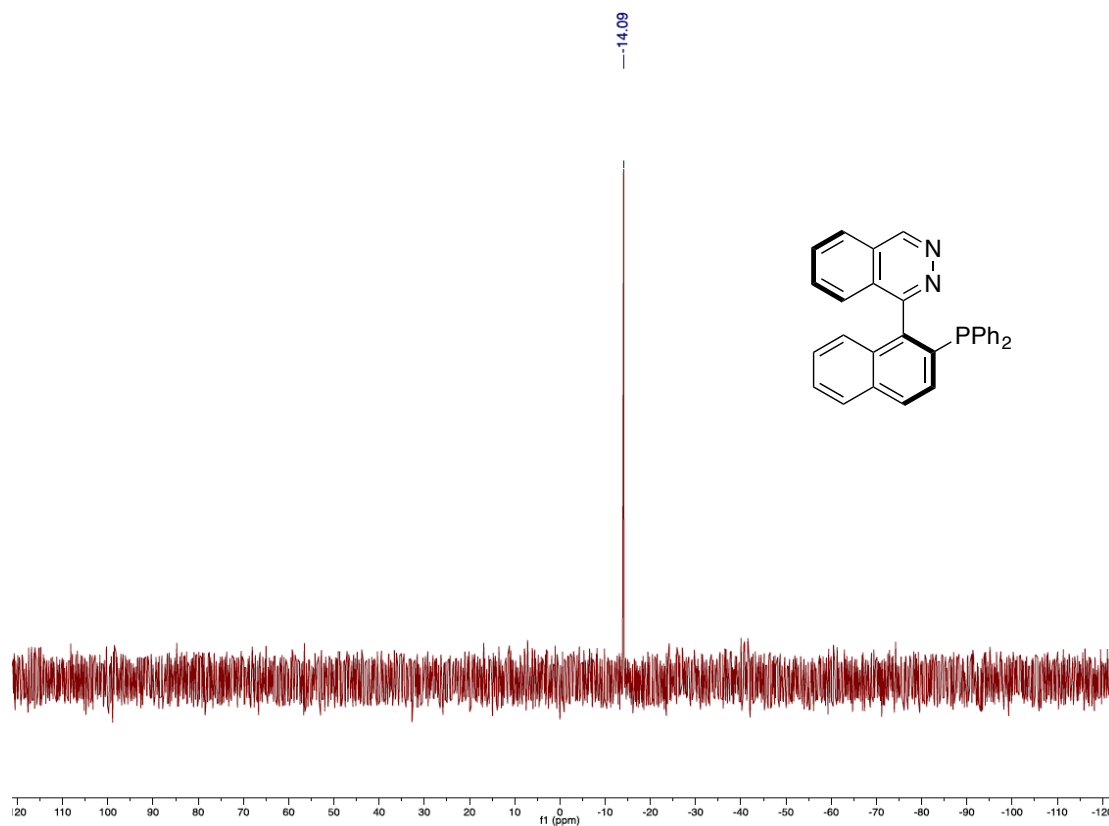

**Figure S41.**  $^{31}\text{P}$  NMR (161 MHz,  $\text{CDCl}_3$ ) of **(S)-3Da**

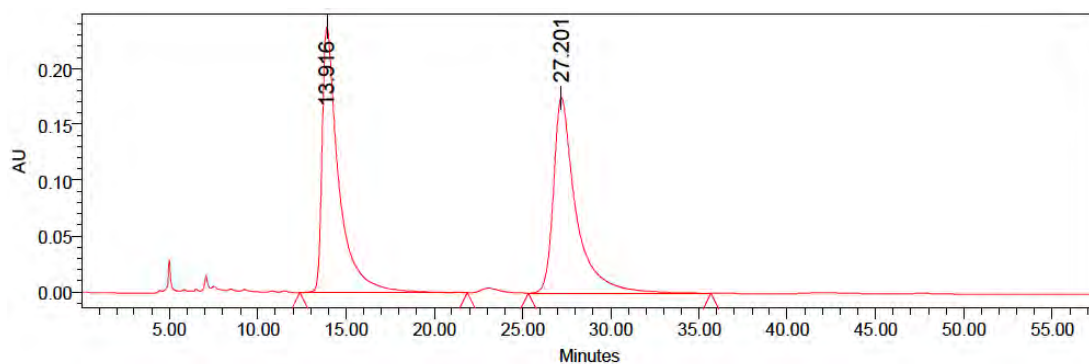

|   | Processed Channel | Retention Time (min) | Area     | % Area | Height |
|---|-------------------|----------------------|----------|--------|--------|
| 1 | PDA 229.7 nm      | 13.916               | 15512012 | 49.95  | 237559 |
| 2 | PDA 229.7 nm      | 27.201               | 15542469 | 50.05  | 174951 |

**Figure S42. Phosphine oxide racemic sample:** IA column, Hex:Isop 50:50, T= 30°C, F= 1mL/min.

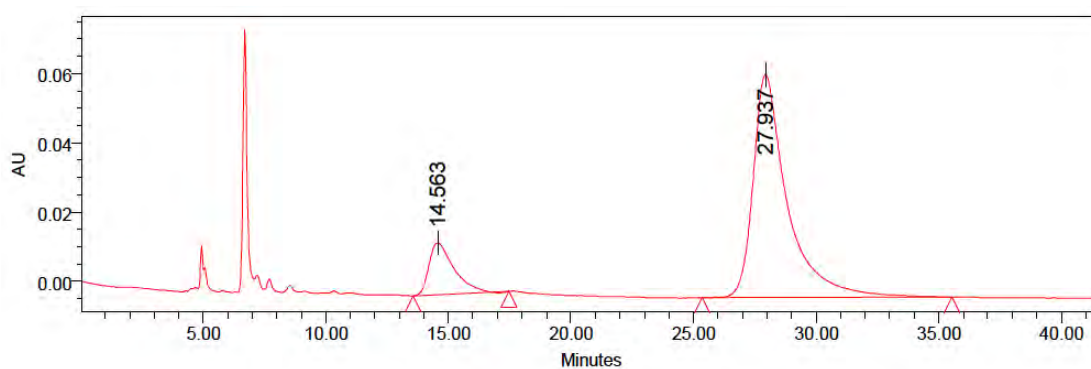

|   | Processed Channel | Retention Time (min) | Area    | % Area | Height |
|---|-------------------|----------------------|---------|--------|--------|
| 1 | PDA 229.7 nm      | 14.563               | 1060759 | 14.52  | 14936  |
| 2 | PDA 229.7 nm      | 27.937               | 6244818 | 85.48  | 64318  |

**Figure S43. Phosphine oxide enantioriched sample:** er 14.5:85.5.

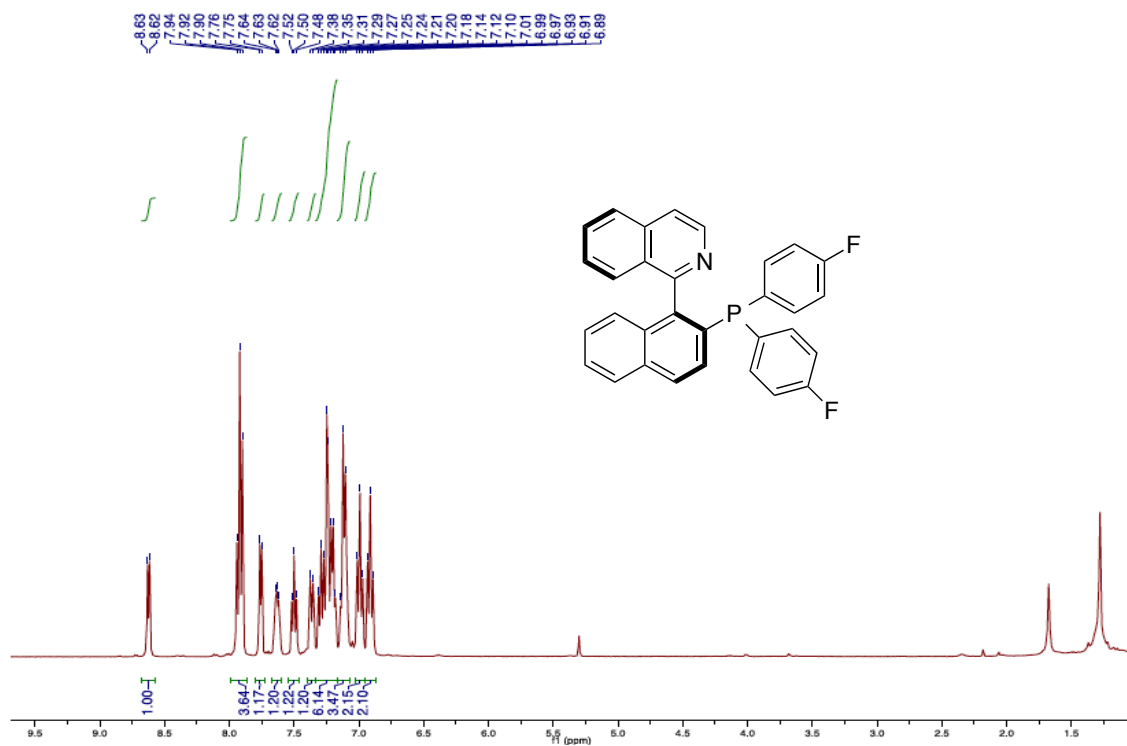

**Figure S44.** <sup>1</sup>H NMR (400 MHz, CDCl<sub>3</sub>) of (*S*)-3Ab

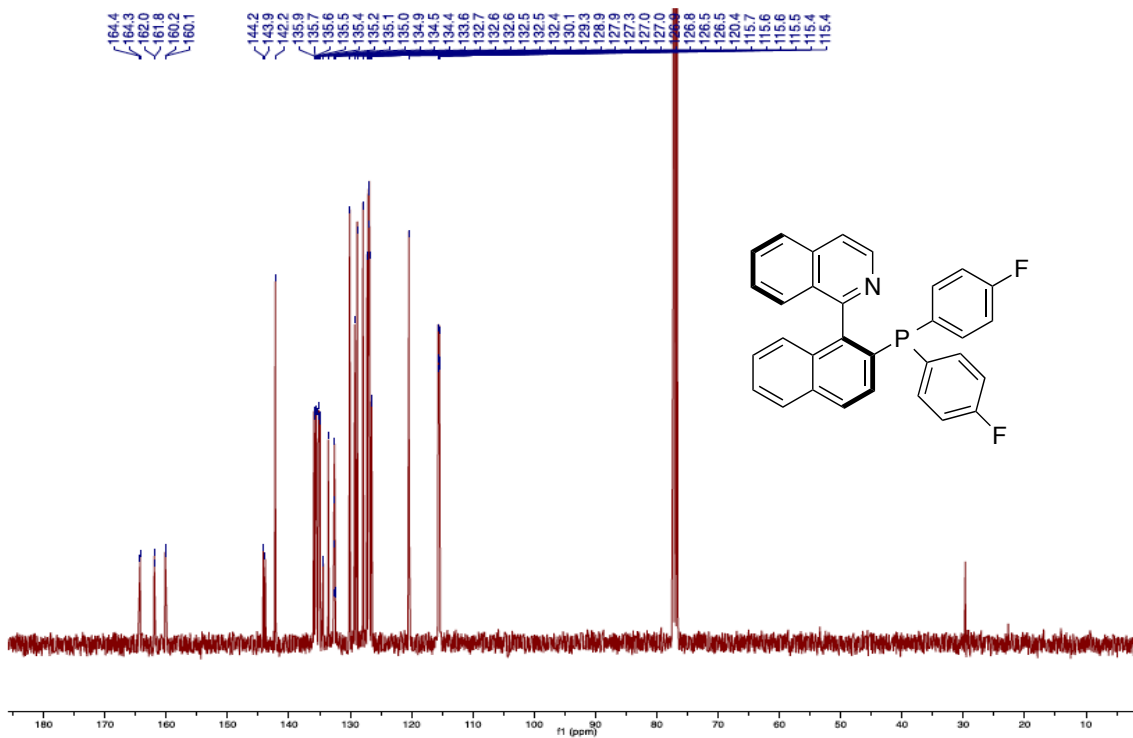

**Figure S45.** <sup>13</sup>C NMR (100 MHz, CDCl<sub>3</sub>) of (*S*)-3Ab

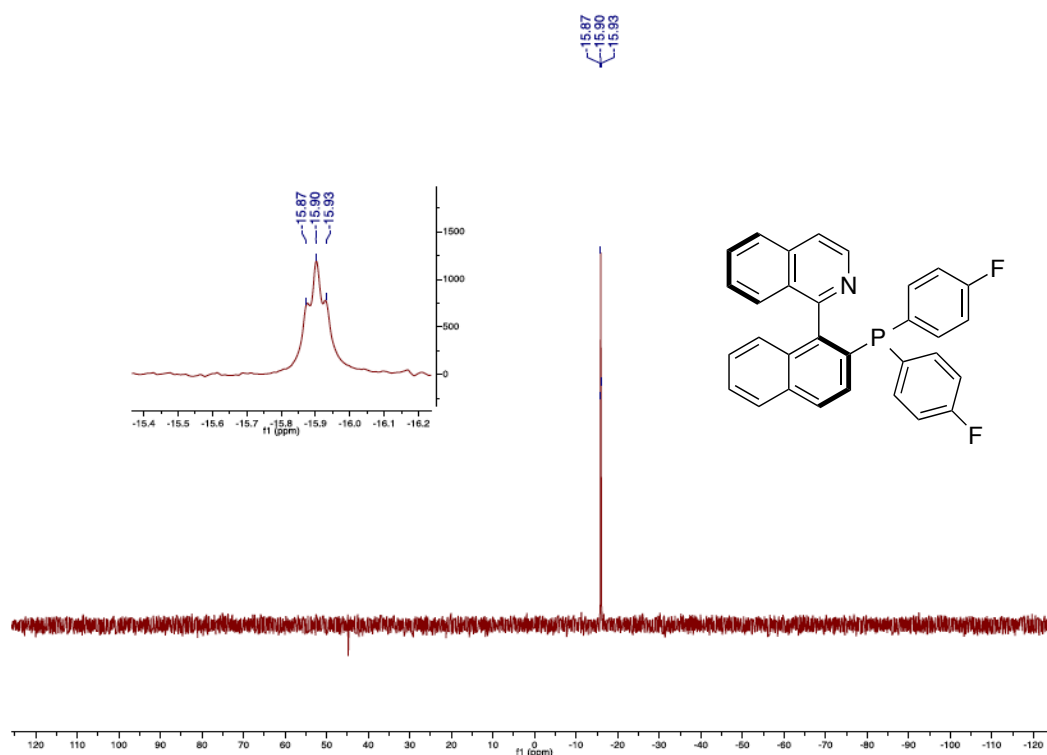

**Figure S46.**  $^{31}\text{P}$  NMR (161 MHz,  $\text{CDCl}_3$ ) of **(S)-3Ab**

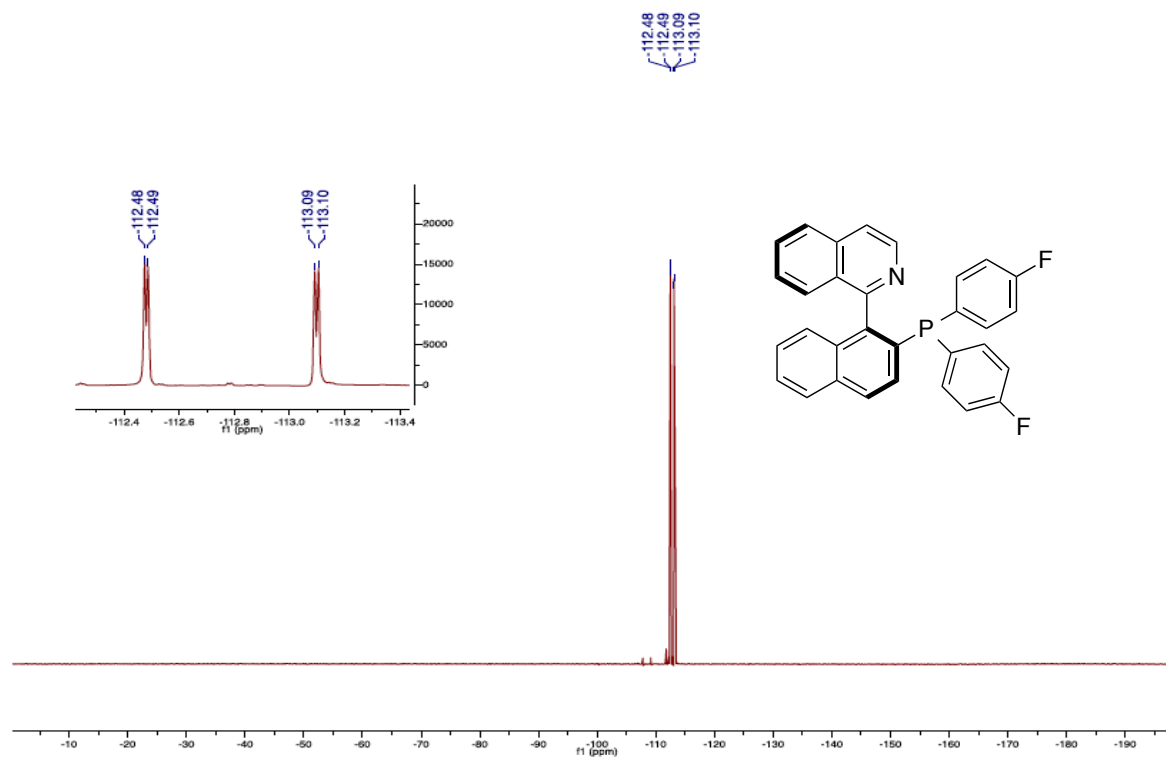

**Figure S47.**  $^{19}\text{F}$  NMR (377 MHz,  $\text{CDCl}_3$ ) of **(S)-3Ab**



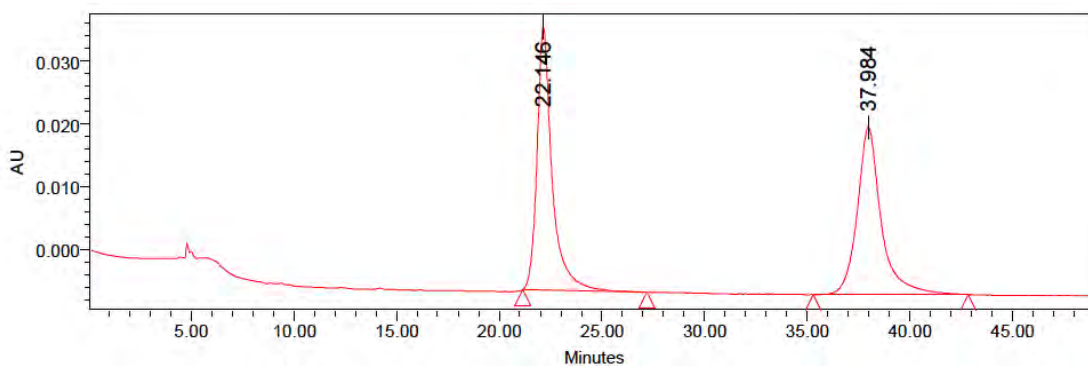

|   | Processed Channel | Retention Time (min) | Area    | % Area | Height |
|---|-------------------|----------------------|---------|--------|--------|
| 1 | PDA 221.5 nm      | 22.146               | 2143439 | 49.71  | 41856  |
| 2 | PDA 221.5 nm      | 37.984               | 2168742 | 50.29  | 26631  |

**Figure S48. Phosphine oxide racemic sample:** IA column, Hex:Isop 85:15, T= 30°C, F= 1mL/min.

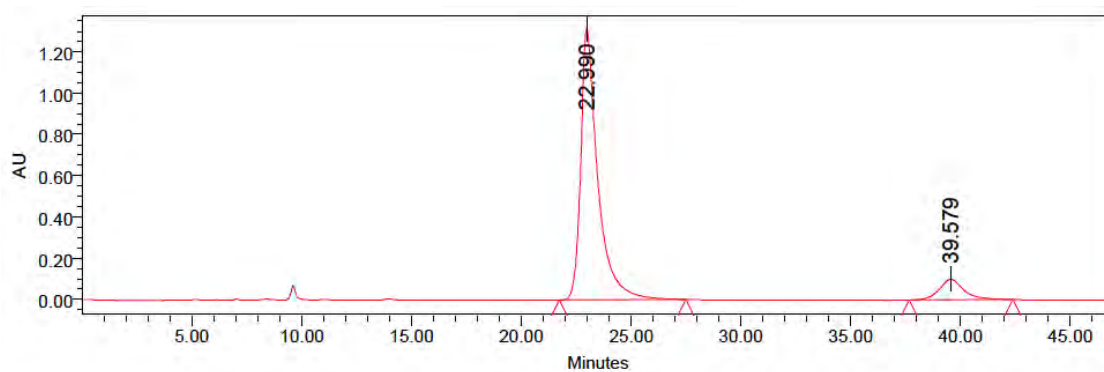

|   | Processed Channel | Retention Time (min) | Area     | % Area | Height  |
|---|-------------------|----------------------|----------|--------|---------|
| 1 | PDA 221.5 nm      | 22.990               | 70857057 | 90.07  | 1313590 |
| 2 | PDA 221.5 nm      | 39.579               | 7811885  | 9.93   | 99783   |

**Figure S49. Phosphine oxide enantioriched sample:** er 90:10.

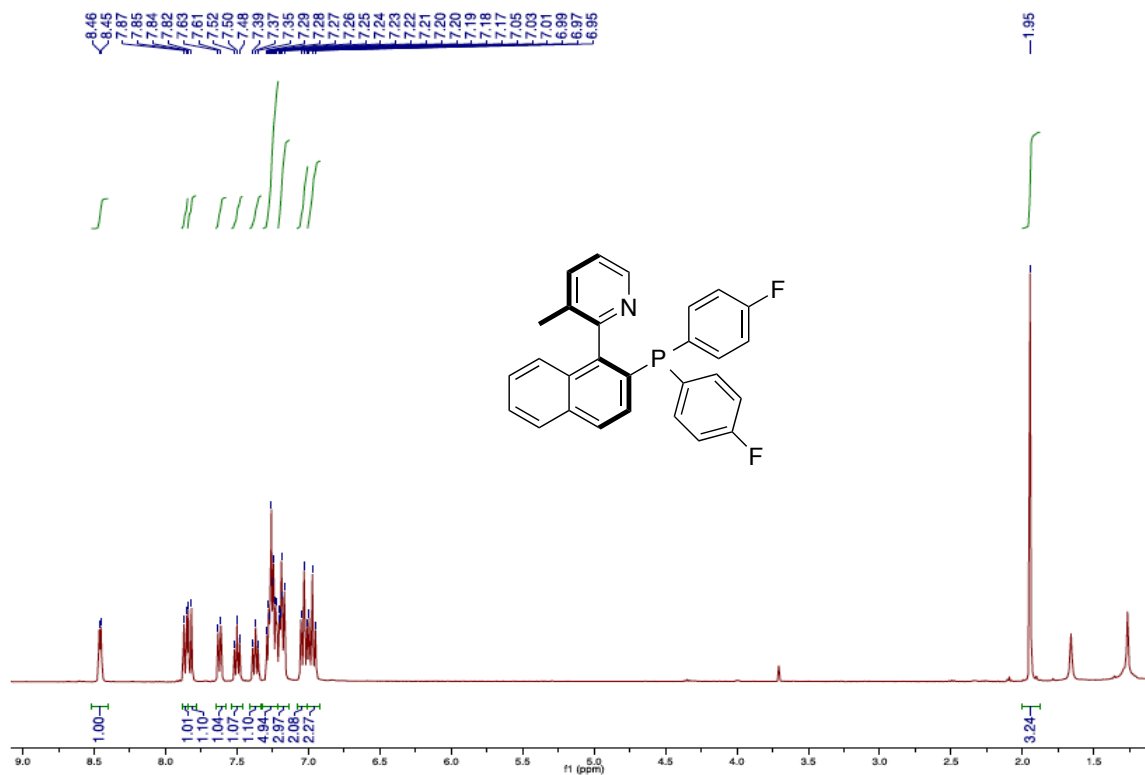

**Figure S50.** <sup>1</sup>H NMR (400 MHz, CDCl<sub>3</sub>) of (*S*)-3Bb

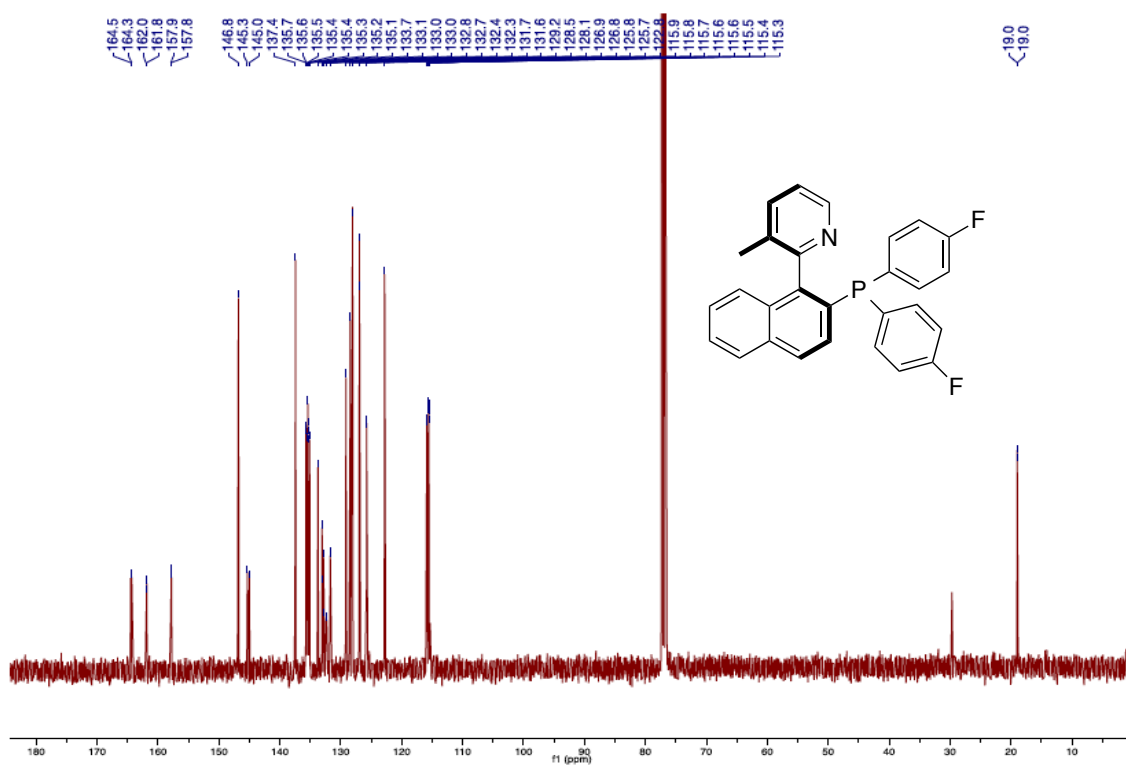

**Figure S51.**  $^{13}\text{C}$  NMR (100 MHz,  $\text{CDCl}_3$ ) of (*S*)-3Bb

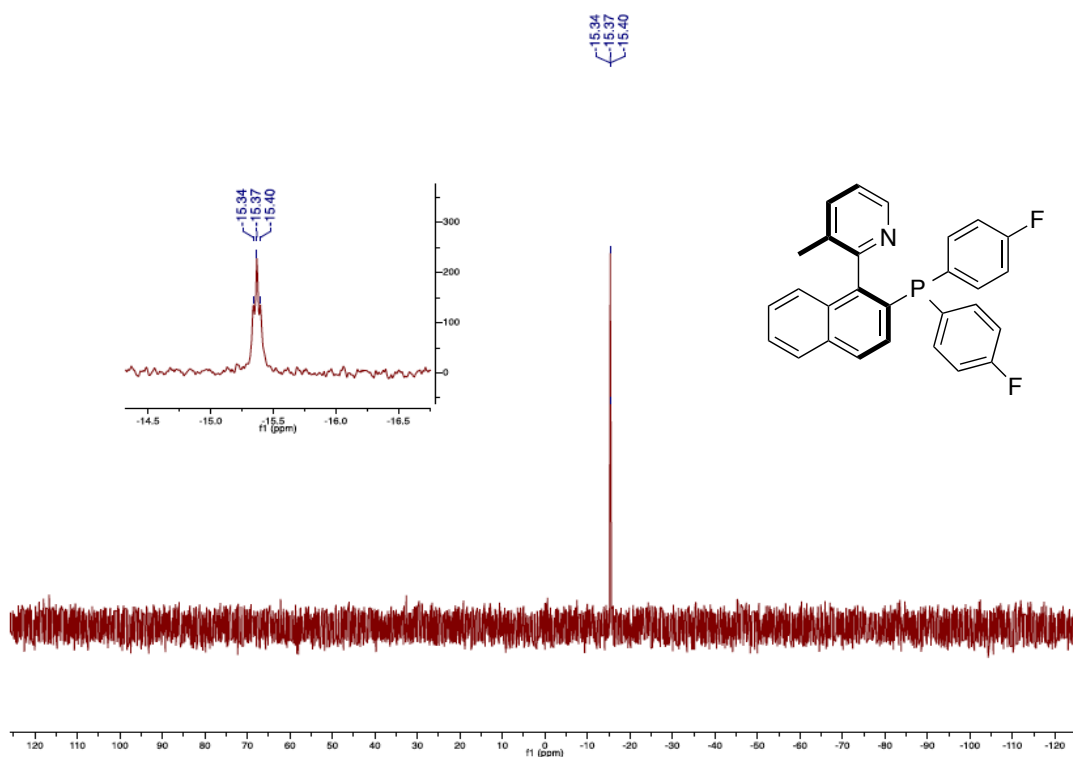

**Figure S52.**  $^{31}\text{P}$  NMR (161 MHz,  $\text{CDCl}_3$ ) of (*S*)-3Bb

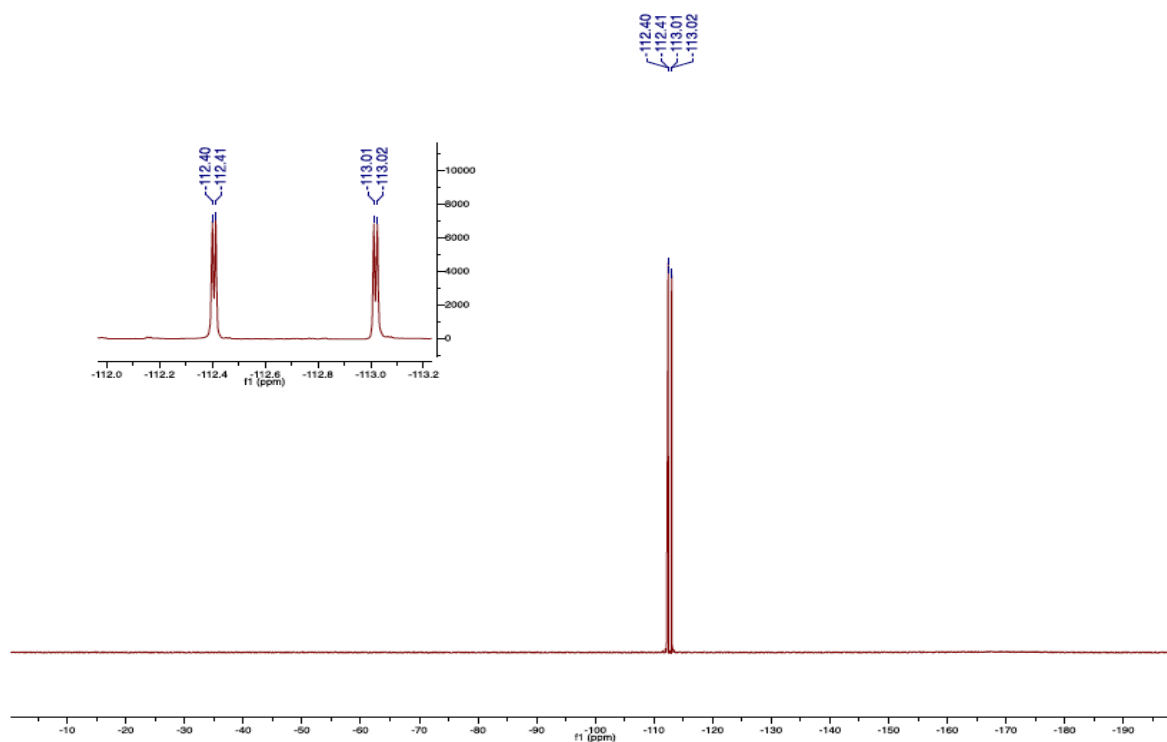

**Figure S53.**  $^{19}\text{F}$  NMR (377 MHz,  $\text{CDCl}_3$ ) of (*S*)-3Bb

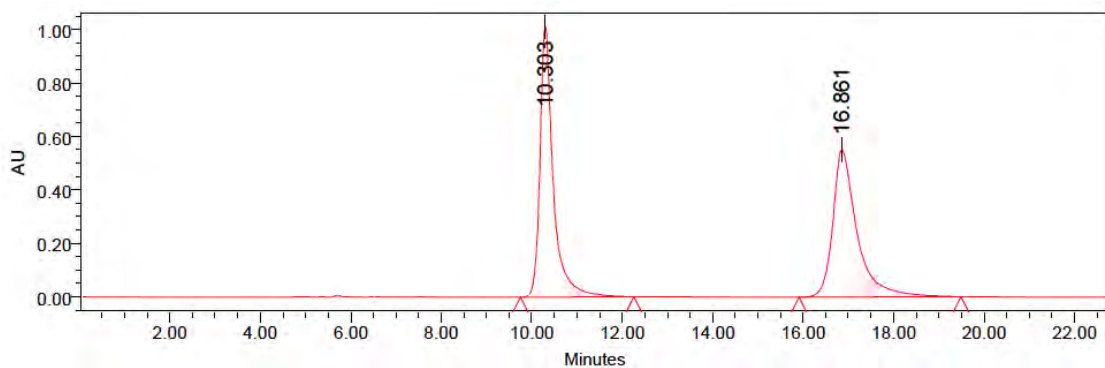

|   | Processed Channel | Retention Time (min) | Area     | % Area | Height  |
|---|-------------------|----------------------|----------|--------|---------|
| 1 | PDA 236.0 nm      | 10.303               | 20435412 | 50.06  | 1013596 |
| 2 | PDA 236.0 nm      | 16.861               | 20383602 | 49.94  | 550335  |

**Figure S54. Phosphine oxide racemic sample:** IA column, Hex:Isop 75:25, T= 30°C, F= 1mL/min.

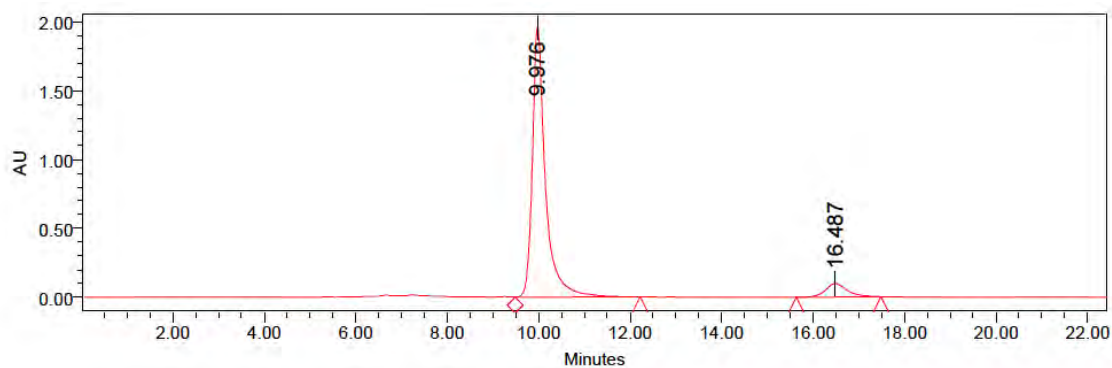

|   | Processed Channel | Retention Time (min) | Area     | % Area | Height  |
|---|-------------------|----------------------|----------|--------|---------|
| 1 | PDA 236.0 nm      | 9.976                | 38904508 | 92.57  | 1960137 |
| 2 | PDA 236.0 nm      | 16.487               | 3124873  | 7.43   | 96937   |

**Figure S55. Phosphine oxide enantioriched sample:** er 92.5:7.5.

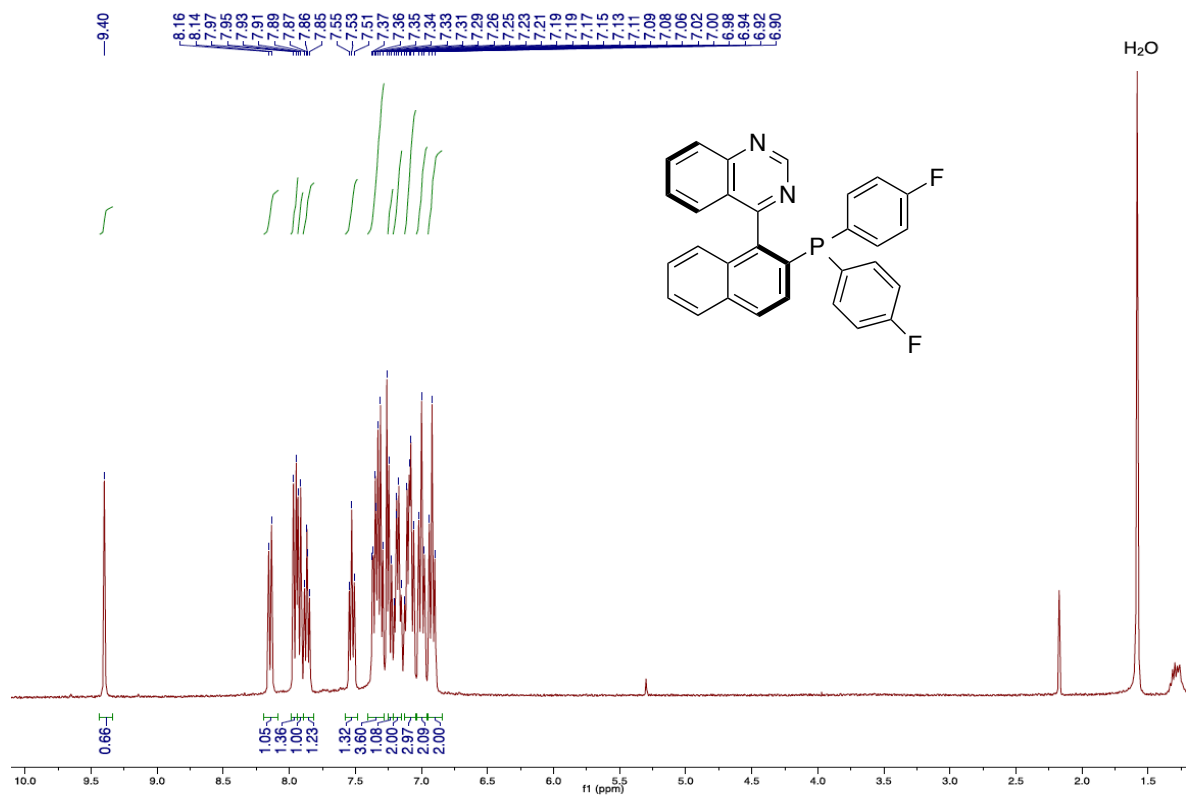

**Figure S56.** <sup>1</sup>H NMR (400 MHz, CDCl<sub>3</sub>) of (S)-3Cb

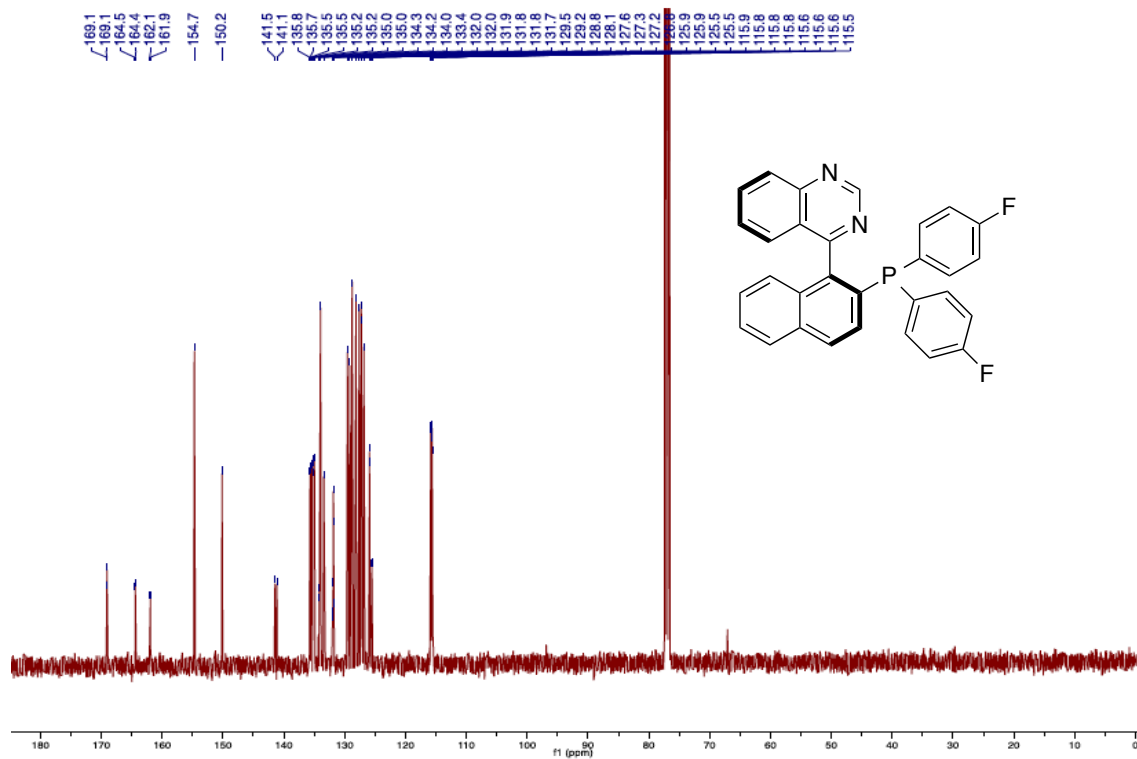

**Figure S57.** <sup>13</sup>C NMR (100 MHz, CDCl<sub>3</sub>) of (S)-3Cb

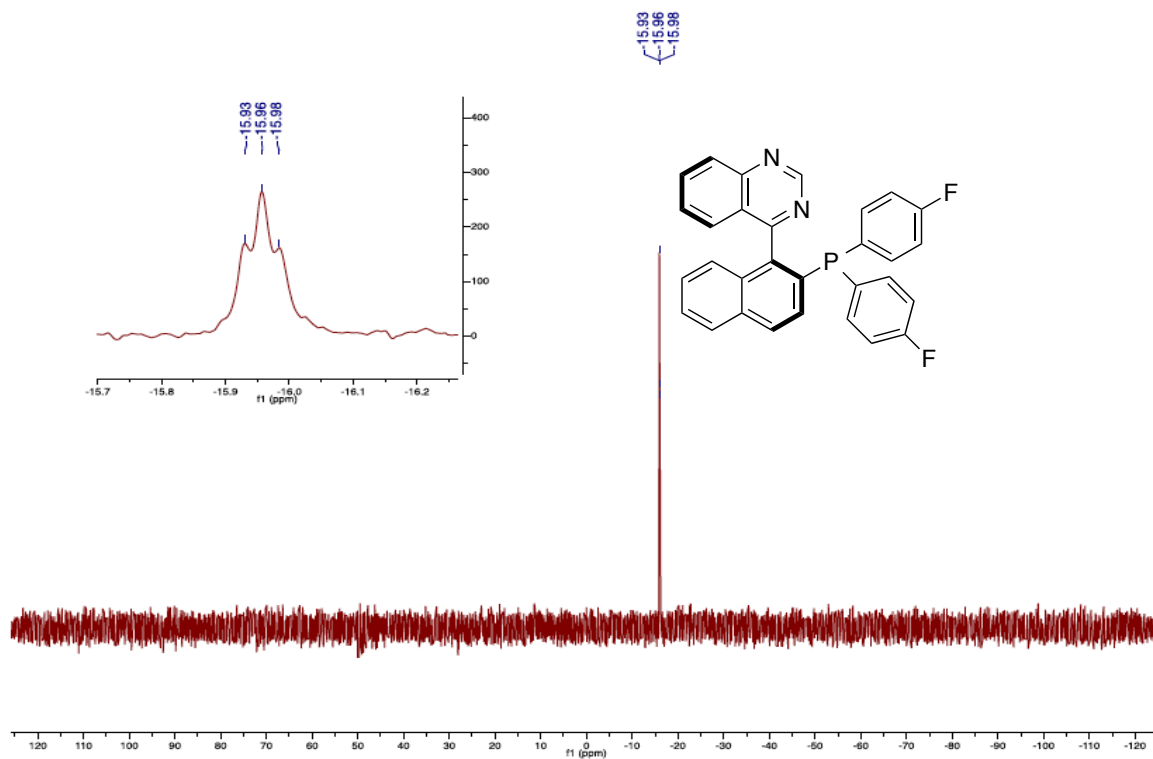

**Figure S58.** <sup>31</sup>P NMR (161 MHz, CDCl<sub>3</sub>) of (S)-3Cb

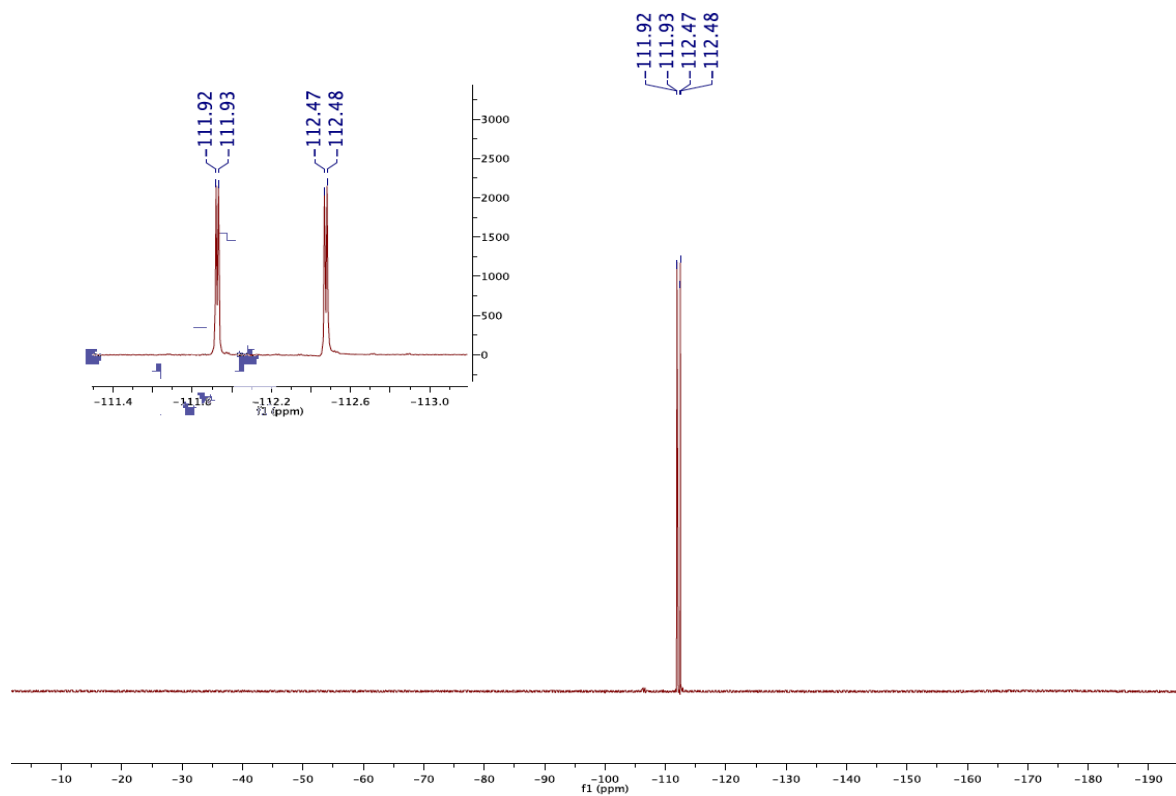

**Figure S59.** <sup>19</sup>F NMR (377 MHz, CDCl<sub>3</sub>) of (S)-3Cb

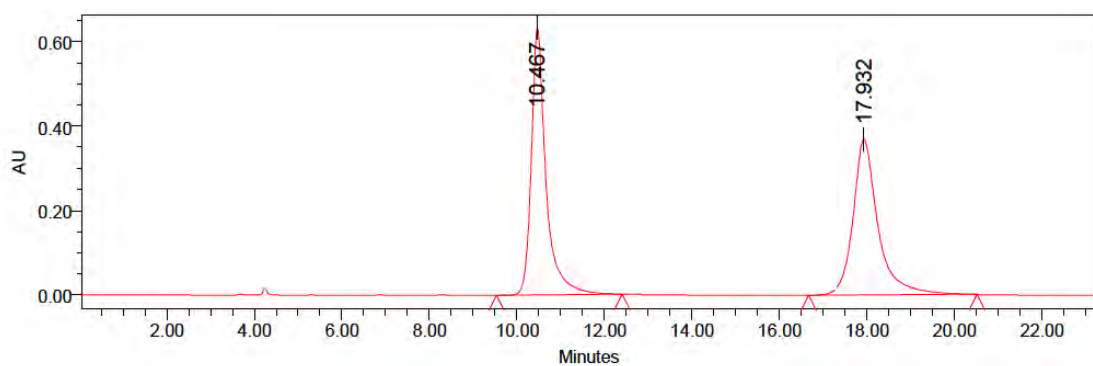

|   | Processed Channel | Retention Time (min) | Area     | % Area | Height |
|---|-------------------|----------------------|----------|--------|--------|
| 1 | PDA 229.7 nm      | 10.467               | 14737393 | 50.11  | 633265 |
| 2 | PDA 229.7 nm      | 17.932               | 14673815 | 49.89  | 368205 |

**Figure S60. Phosphine oxide racemic sample:** IA column, Hex:Isop 75:25, T= 30°C, F= 1mL/min.

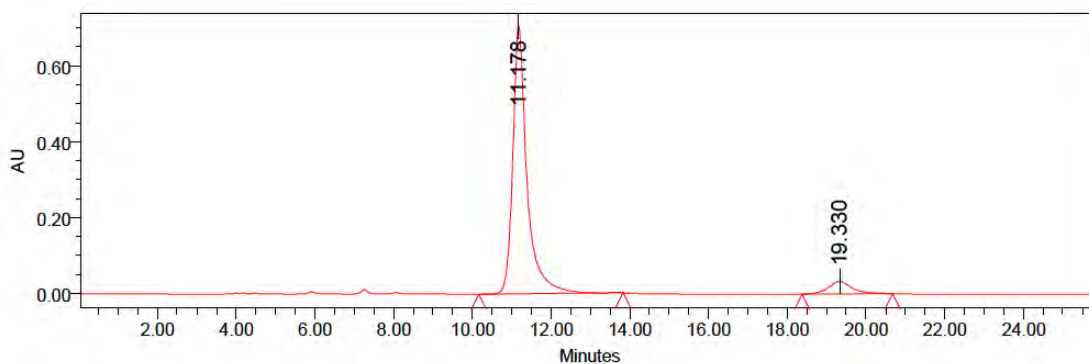

|   | Processed Channel | Retention Time (min) | Area     | % Area | Height |
|---|-------------------|----------------------|----------|--------|--------|
| 1 | PDA 229.7 nm      | 11.178               | 17727710 | 92.99  | 705953 |
| 2 | PDA 229.7 nm      | 19.330               | 1336010  | 7.01   | 32517  |

**Figure S61. Phosphine oxide enantioriched sample:** er 93:7.

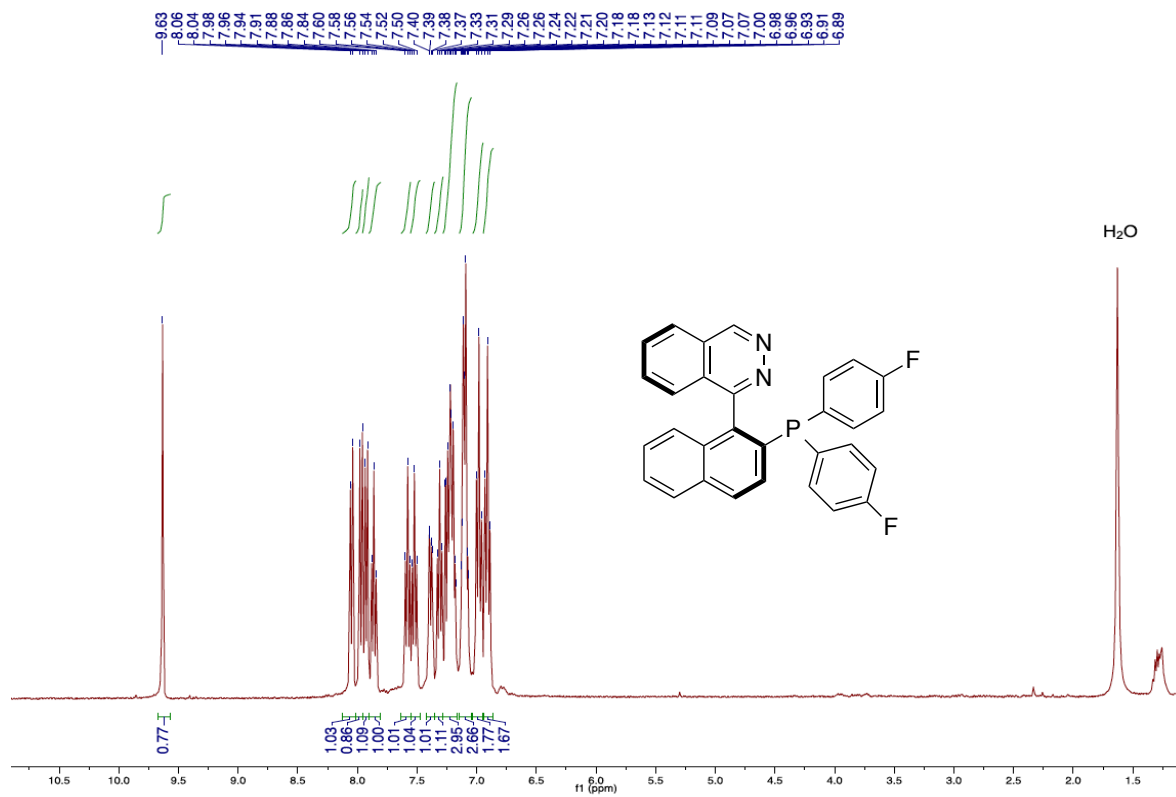

**Figure S62.** <sup>1</sup>H NMR (400 MHz, CDCl<sub>3</sub>) of (S)-3Db

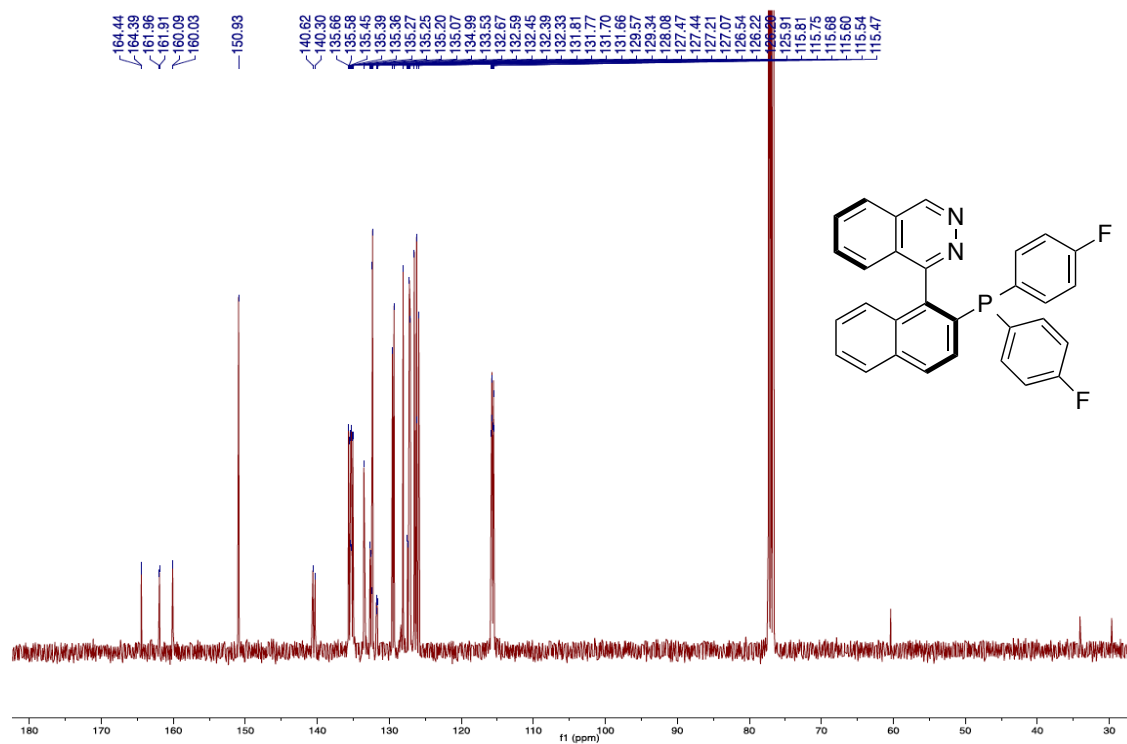

**Figure S63.** <sup>13</sup>C NMR (100 MHz, CDCl<sub>3</sub>) of (S)-3Db



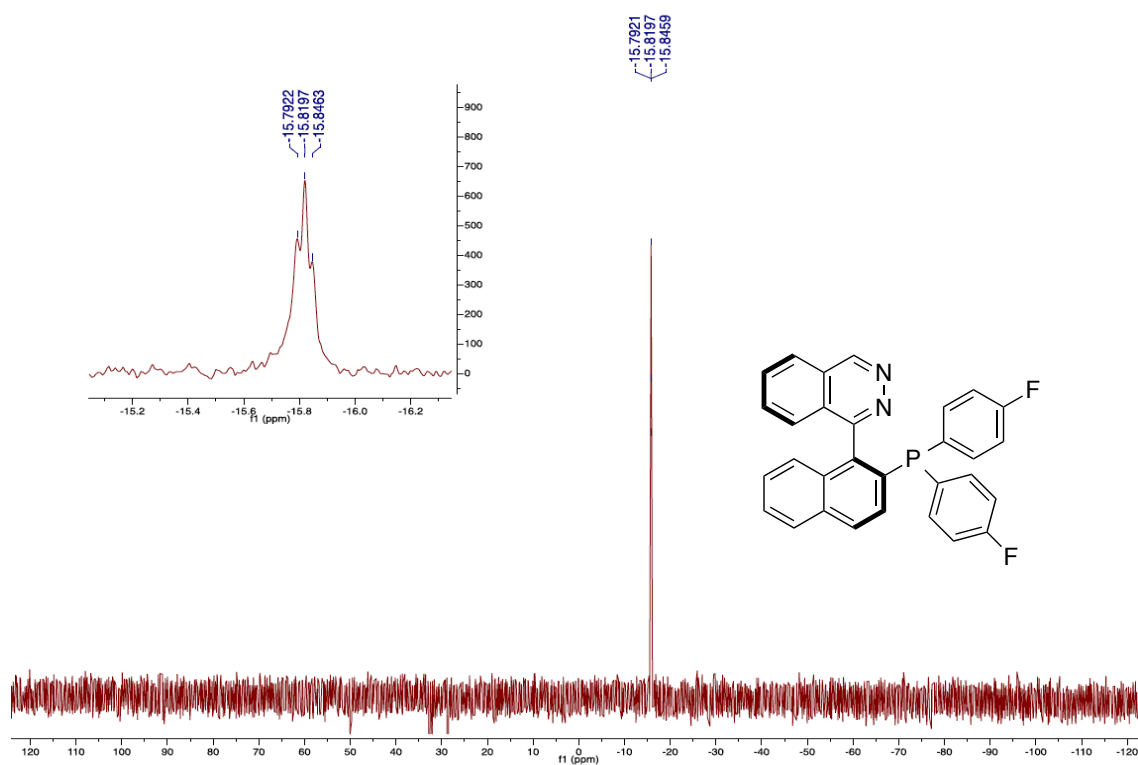

**Figure S64.** <sup>31</sup>P NMR (161 MHz, CDCl<sub>3</sub>) of (S)-3Db

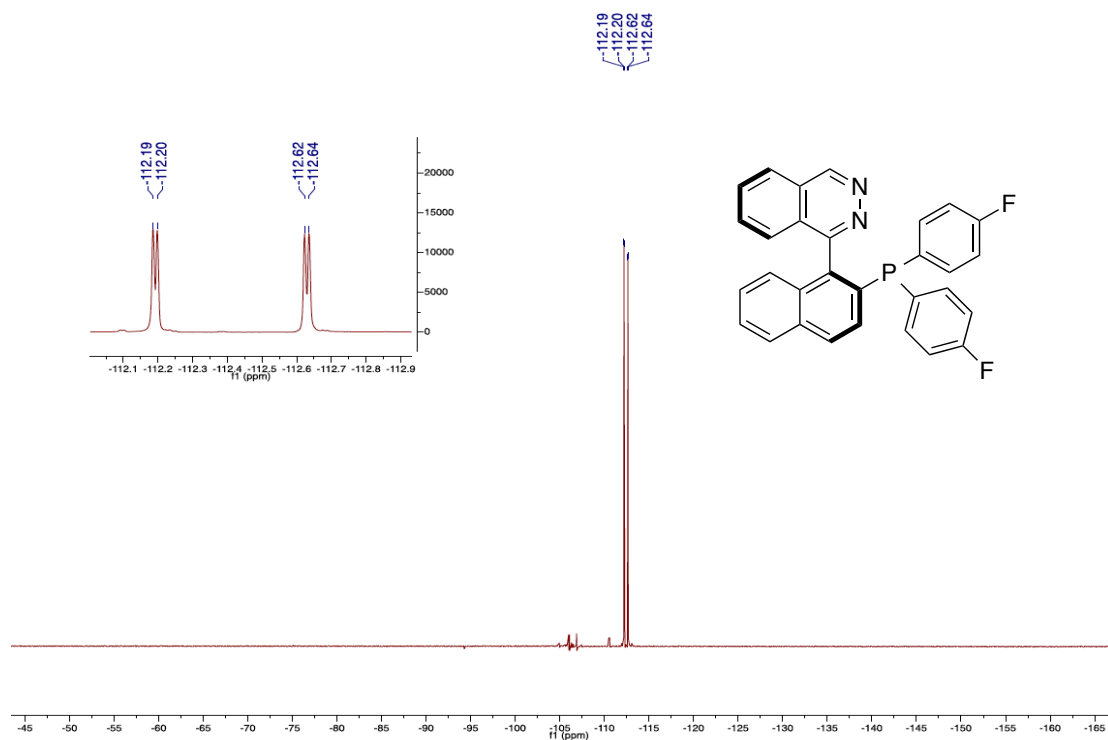

**Figure S65.** <sup>19</sup>F NMR (377 MHz, CDCl<sub>3</sub>) of (S)-3Db

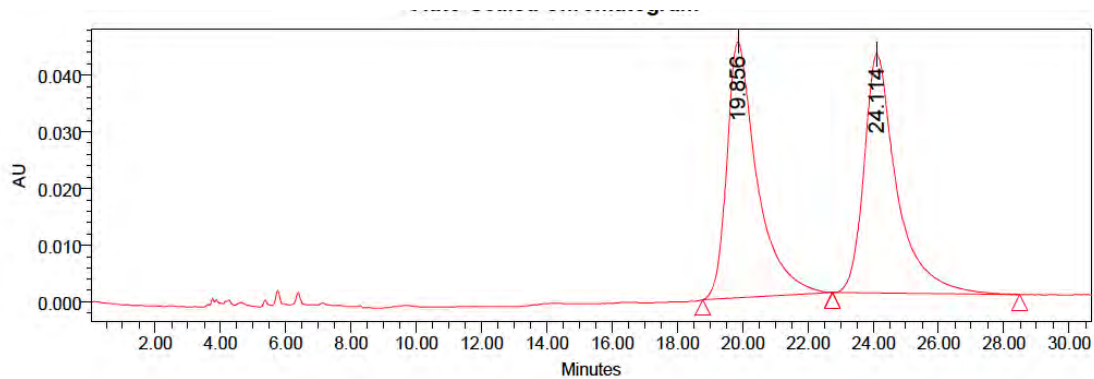

|   | Processed Channel | Retention Time (min) | Area    | % Area | Height |
|---|-------------------|----------------------|---------|--------|--------|
| 1 | PDA 229.0 nm      | 19.856               | 2913477 | 49.71  | 45184  |
| 2 | PDA 229.0 nm      | 24.114               | 2947758 | 50.29  | 42191  |

**Figure S66. Phosphine oxide racemic sample:** IA column, Hex:Isop 70:30, T= 30°C, F= 1mL/min.

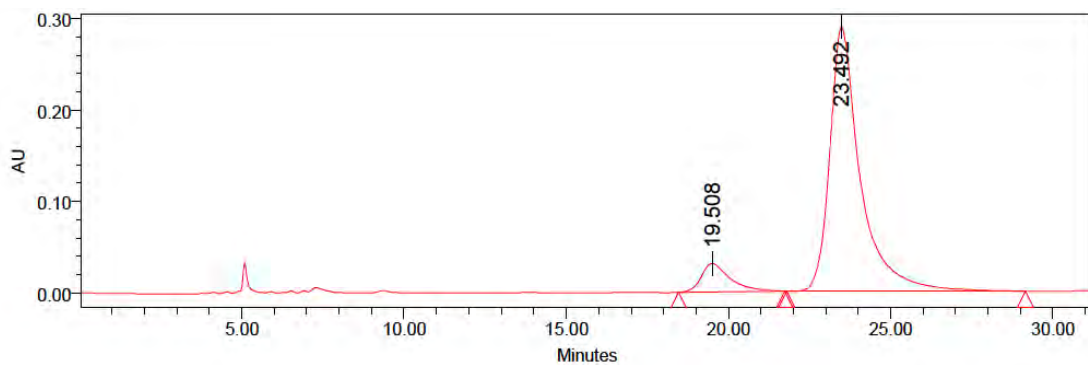

|   | Processed Channel | Retention Time (min) | Area     | % Area | Height |
|---|-------------------|----------------------|----------|--------|--------|
| 1 | PDA 229.0 nm      | 19.508               | 1924647  | 9.18   | 31141  |
| 2 | PDA 229.0 nm      | 23.492               | 19029852 | 90.82  | 289036 |

**Figure S67. Phosphine oxide enantioriched sample:** er 9:91.

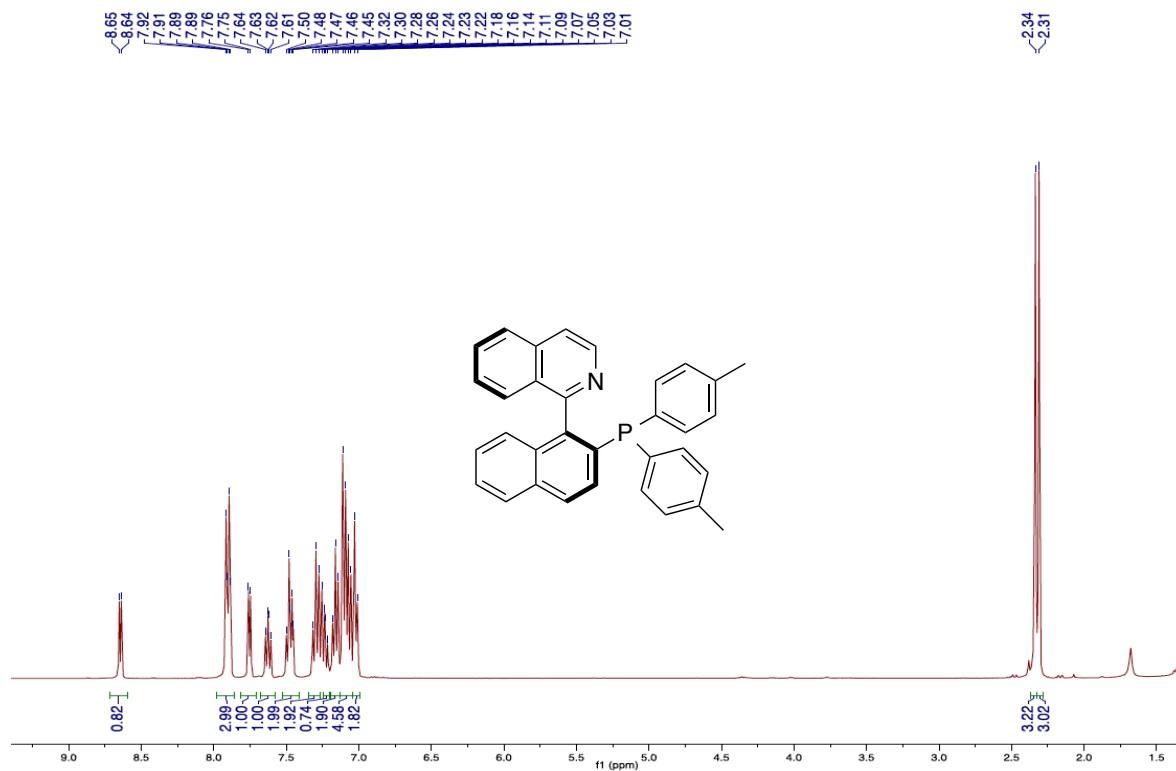

**Figure S68.** <sup>1</sup>H NMR (400 MHz, CDCl<sub>3</sub>) of (*S*)-3Ac

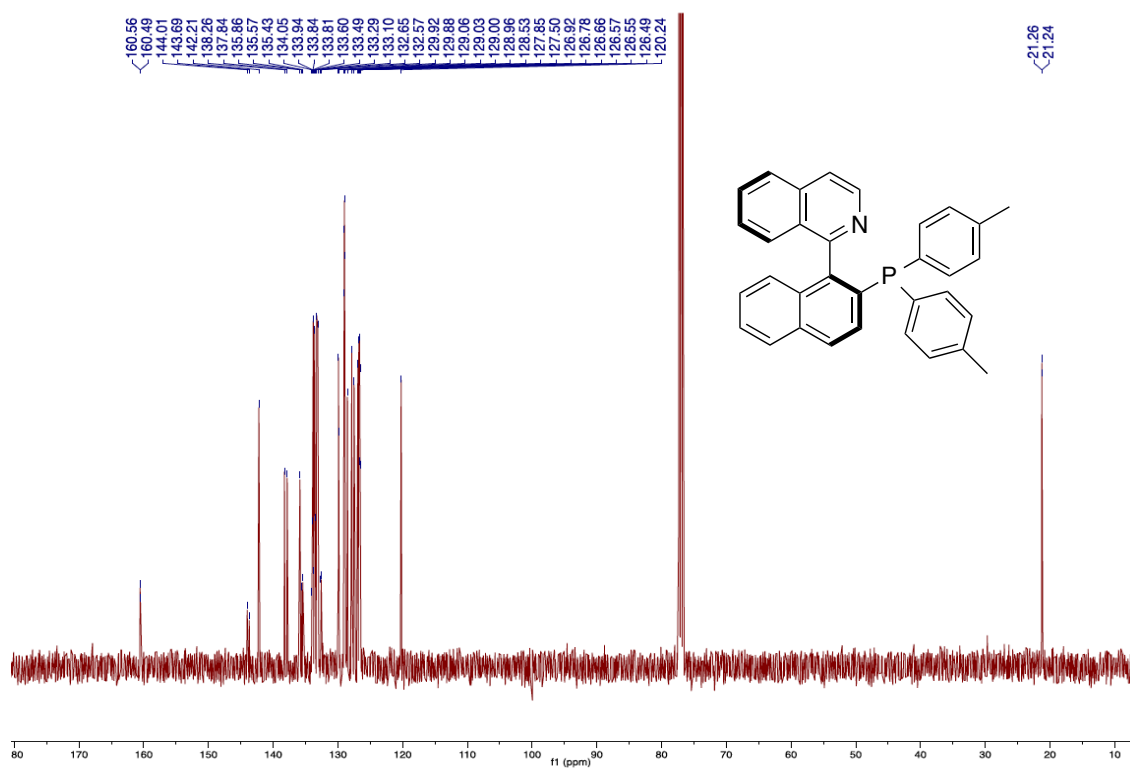

**Figure S69.** <sup>13</sup>C NMR (100 MHz, CDCl<sub>3</sub>) of (*S*)-3Ac

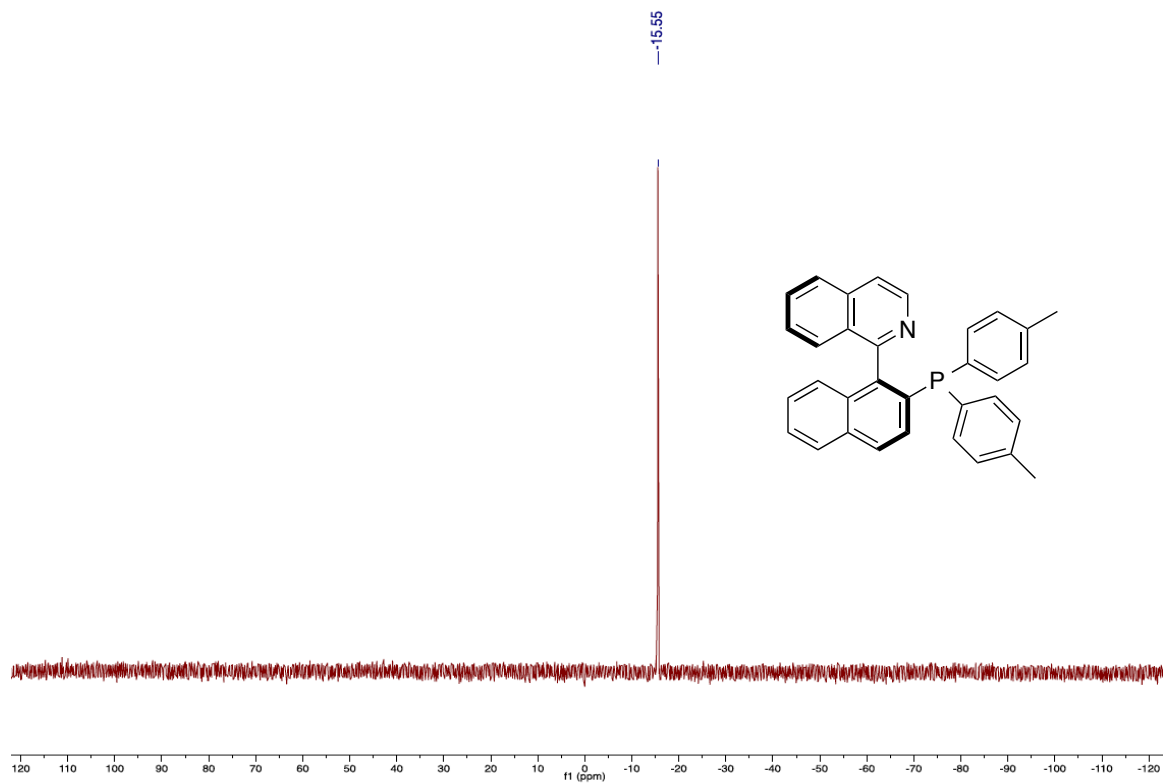

**Figure S70.**  $^{31}\text{P}$  NMR (161 MHz,  $\text{CDCl}_3$ ) of **(S)-3Ac**

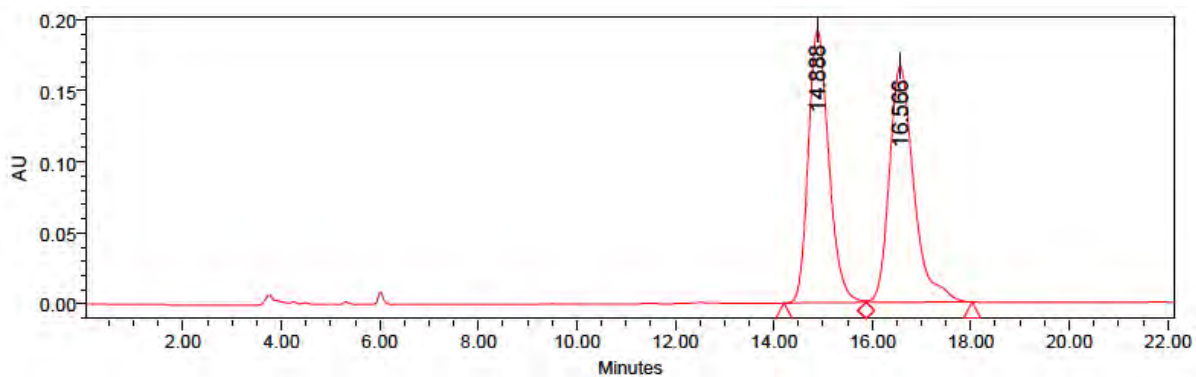

|   | Processed Channel | Retention Time (min) | Area    | % Area | Height |
|---|-------------------|----------------------|---------|--------|--------|
| 1 | PDA 228.0 nm      | 14.888               | 5565129 | 49.05  | 191802 |
| 2 | PDA 228.0 nm      | 16.566               | 5779991 | 50.95  | 166590 |

**Figure S71. Phosphine oxide racemic sample:** AD-H column, Hex:Isop 70:30, T= 30°C, F= 1mL/min.

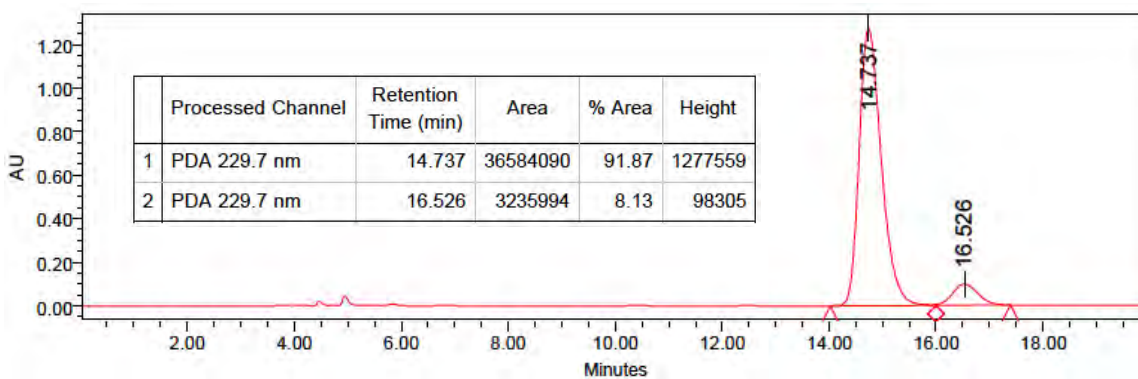

|   | Processed Channel | Retention Time (min) | Area     | % Area | Height  |
|---|-------------------|----------------------|----------|--------|---------|
| 1 | PDA 229.7 nm      | 14.737               | 36584090 | 91.87  | 1277559 |
| 2 | PDA 229.7 nm      | 16.526               | 3235994  | 8.13   | 98305   |

**Figure S72. Phosphine oxide enantioriched sample:** er 92:8.

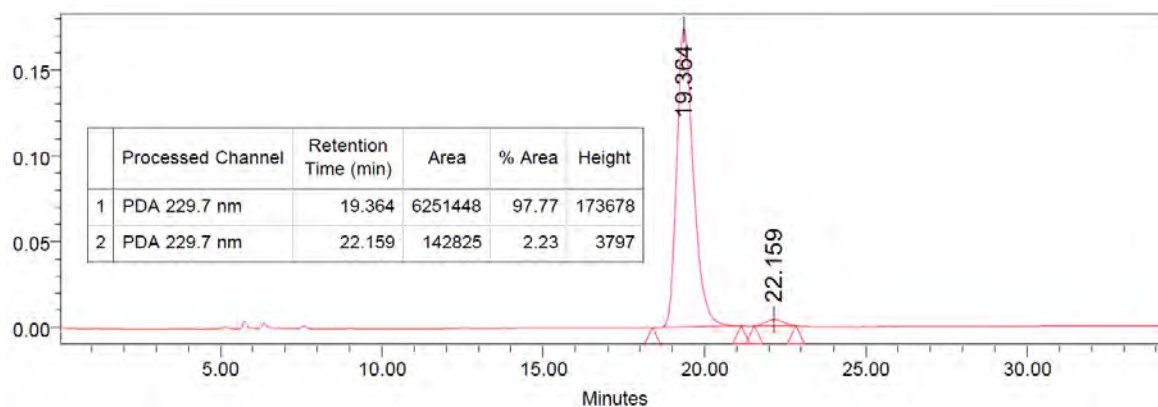

|   | Processed Channel | Retention Time (min) | Area    | % Area | Height |
|---|-------------------|----------------------|---------|--------|--------|
| 1 | PDA 229.7 nm      | 19.364               | 6251448 | 97.77  | 173678 |
| 2 | PDA 229.7 nm      | 22.159               | 142825  | 2.23   | 3797   |

**Figure S73. Enantioenriched product (er 97:5:2.5)** from the mother liquor after crystallization from a EtOAc/*n*-hexane mixture.

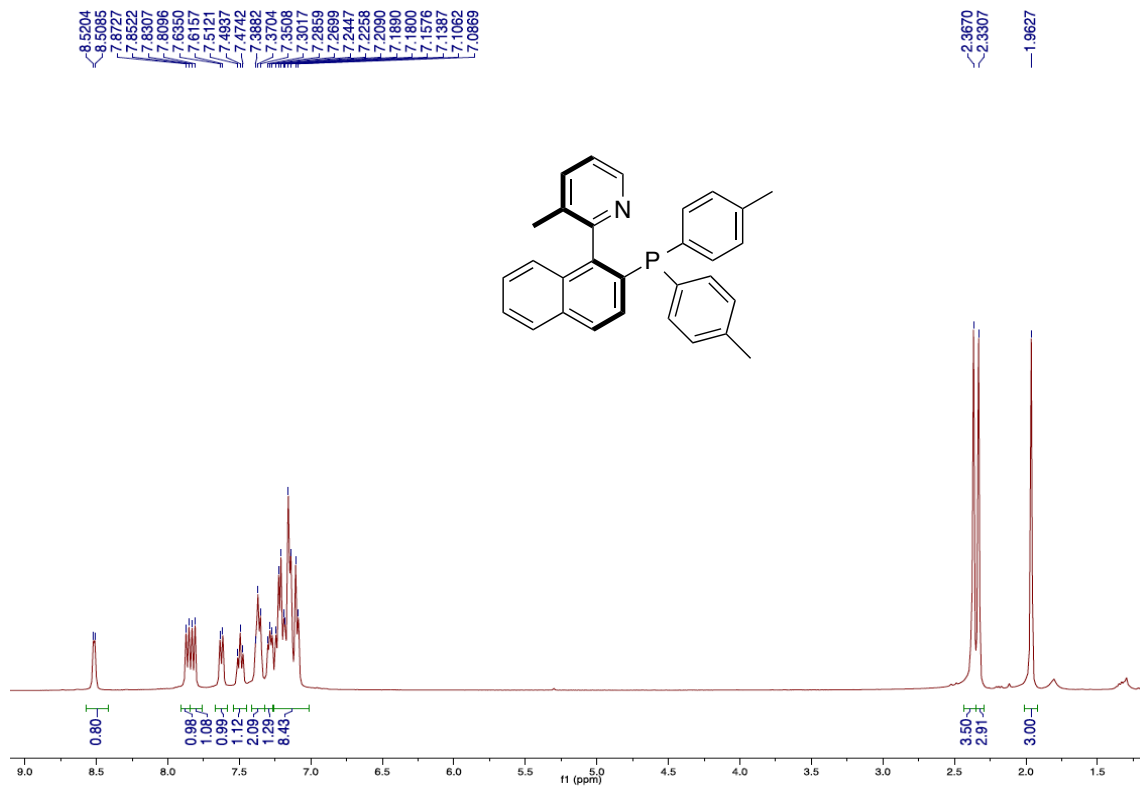

**Figure S74.** <sup>1</sup>H NMR (400 MHz, CDCl<sub>3</sub>) of (S)-3Bc

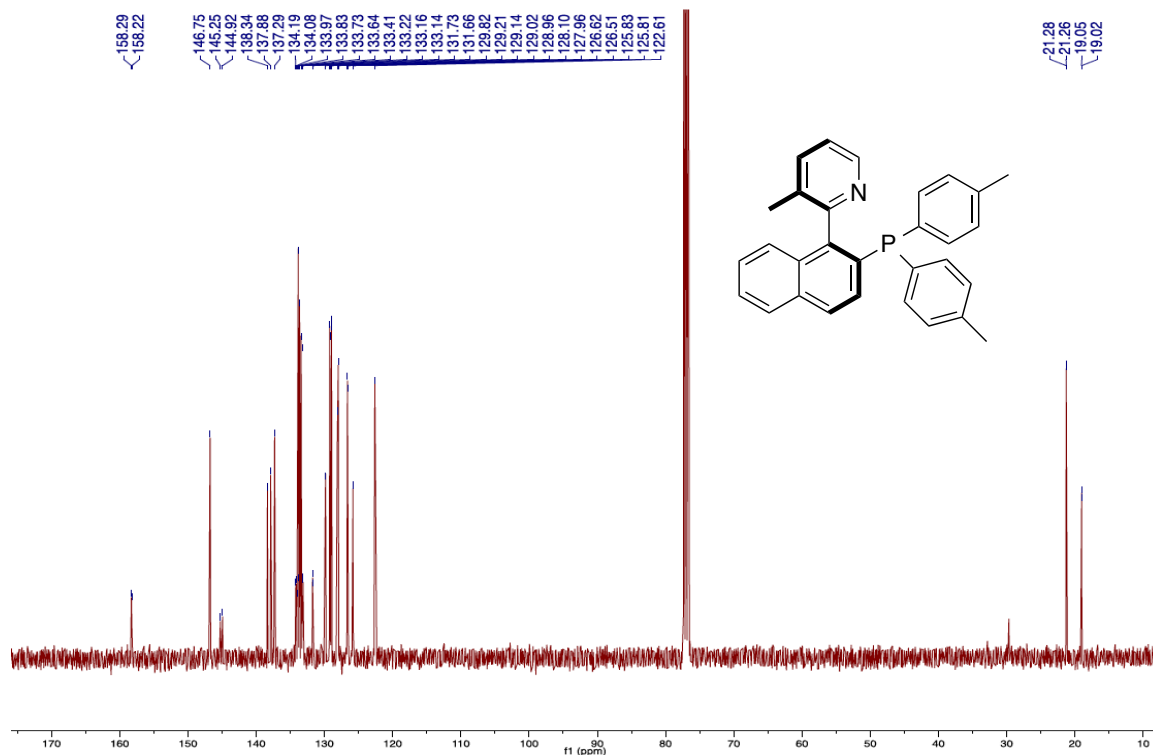

**Figure S75.** <sup>13</sup>C NMR (100 MHz, CDCl<sub>3</sub>) of (S)-3Bc

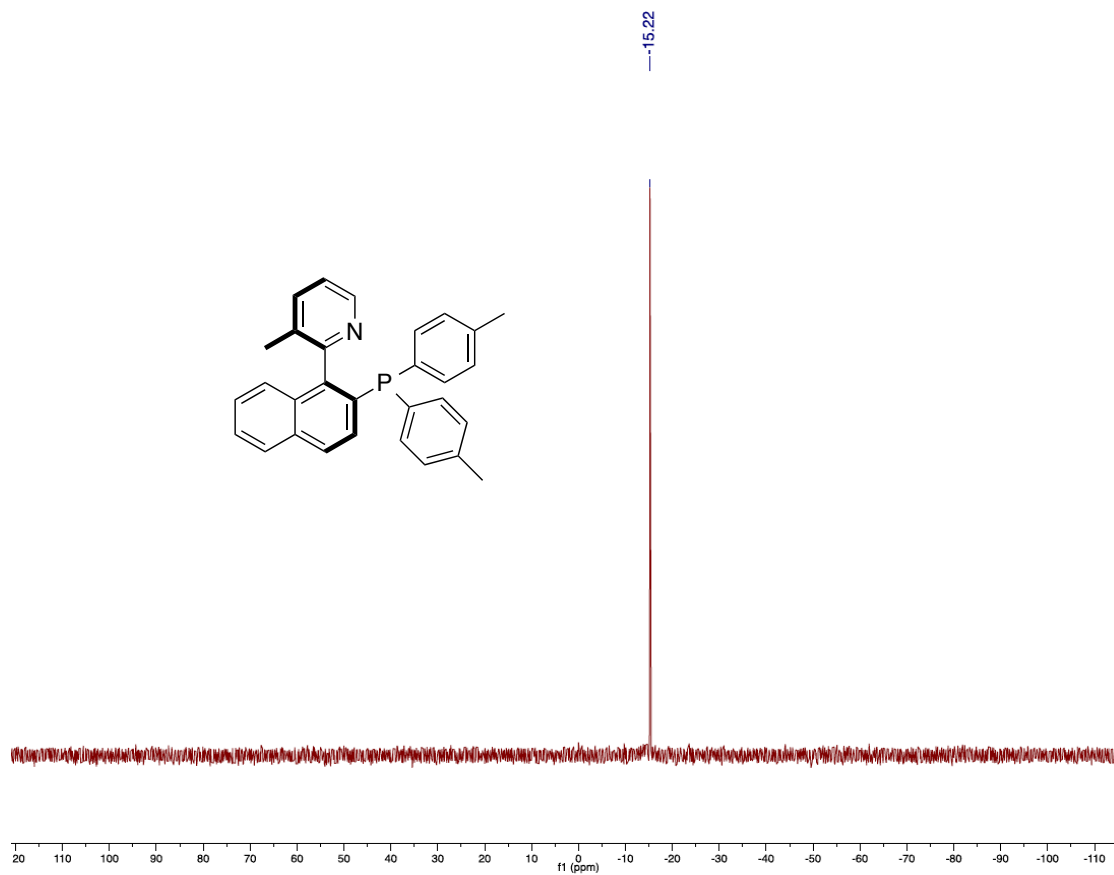

**Figure S76.** <sup>31</sup>P NMR (161 MHz, CDCl<sub>3</sub>) of (S)-3Bc

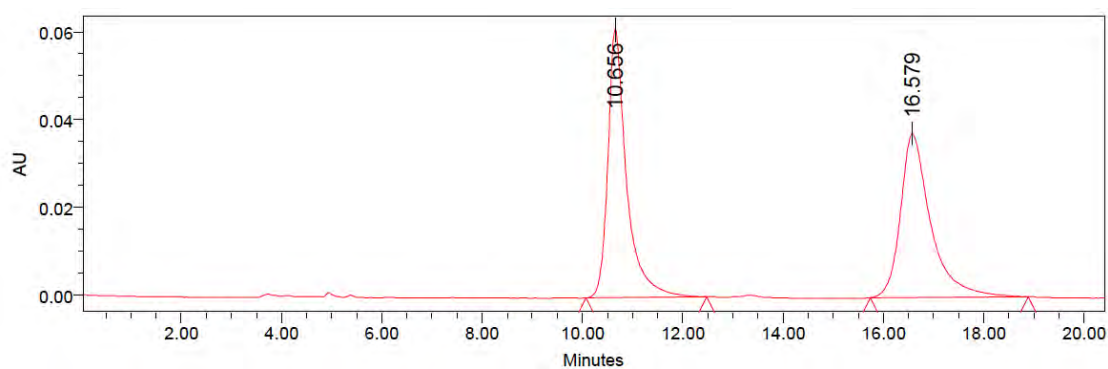

|   | Processed Channel | Retention Time (min) | Area    | % Area | Height |
|---|-------------------|----------------------|---------|--------|--------|
| 1 | PDA 253.5 nm      | 10.656               | 1585406 | 50.45  | 61209  |
| 2 | PDA 253.5 nm      | 16.579               | 1557357 | 49.55  | 37271  |

**Figure S77. Phosphine oxide racemic sample:** IA column, Hex:Isop 70:30, T= 30°C, F= 1mL/min.

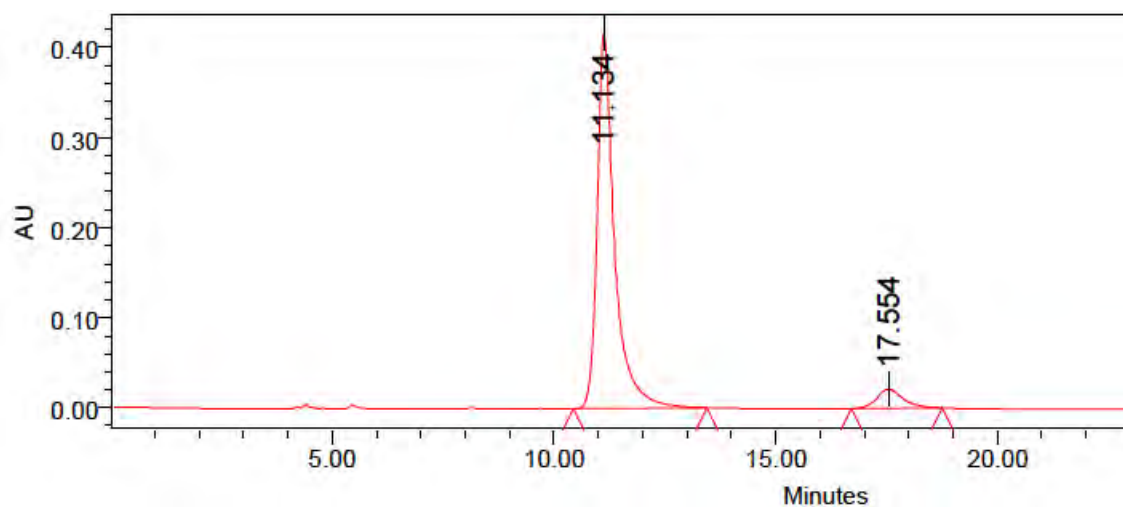

|   | Processed Channel | Retention Time (min) | Area     | % Area | Height |
|---|-------------------|----------------------|----------|--------|--------|
| 1 | PDA 236.0 nm      | 11.134               | 11303460 | 92.90  | 417832 |
| 2 | PDA 236.0 nm      | 17.554               | 864290   | 7.10   | 21216  |

**Figure S78. Phosphine oxide enantioriched sample:** er 93:7.



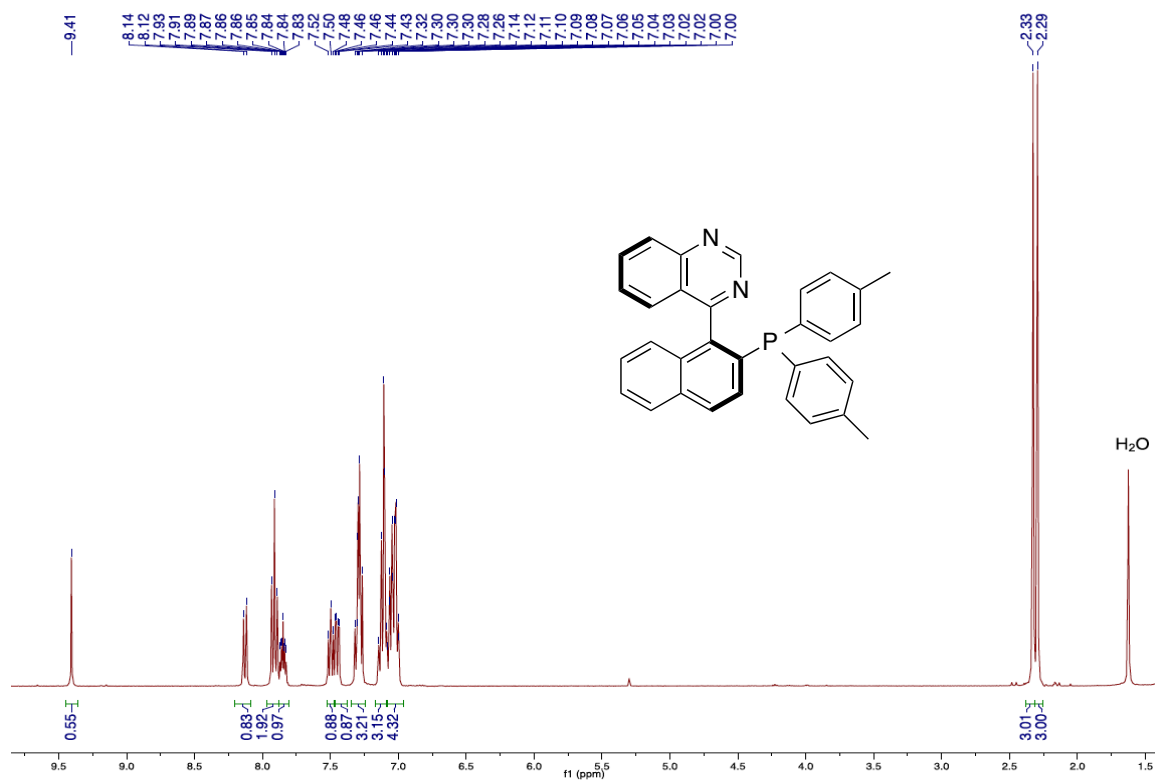

**Figure S79.** <sup>1</sup>H NMR (400 MHz, CDCl<sub>3</sub>) of (S)-3Cc

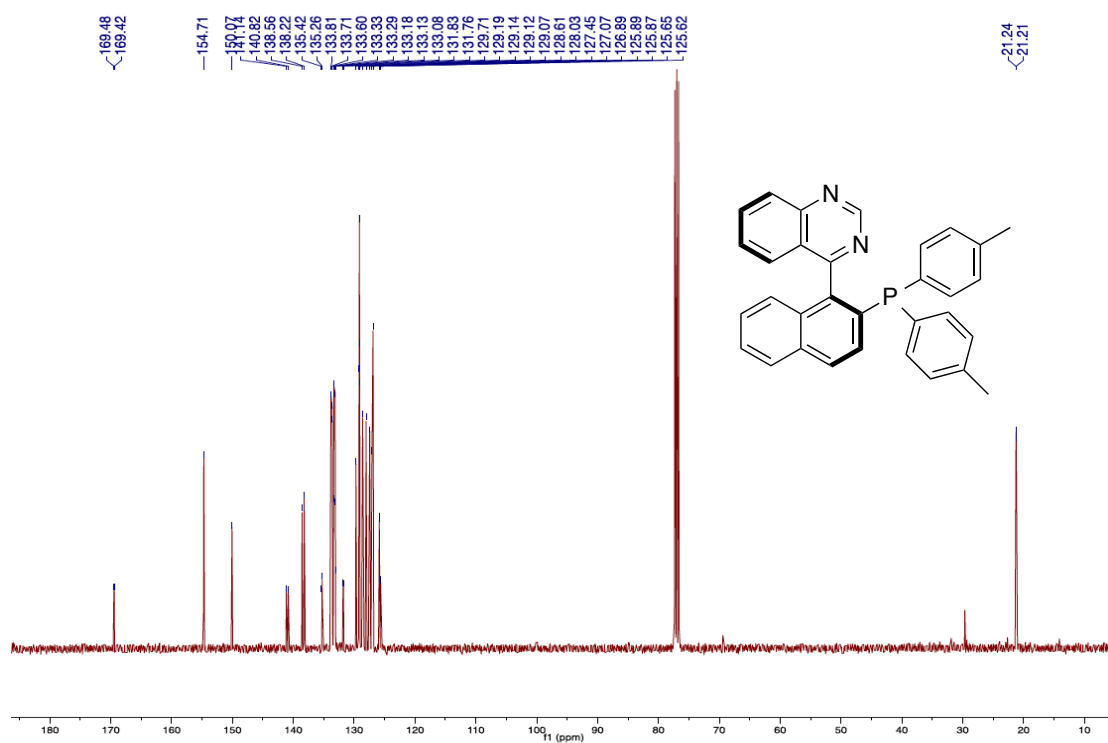

**Figure S80.** <sup>13</sup>C NMR (100 MHz, CDCl<sub>3</sub>) of (S)-3Cc

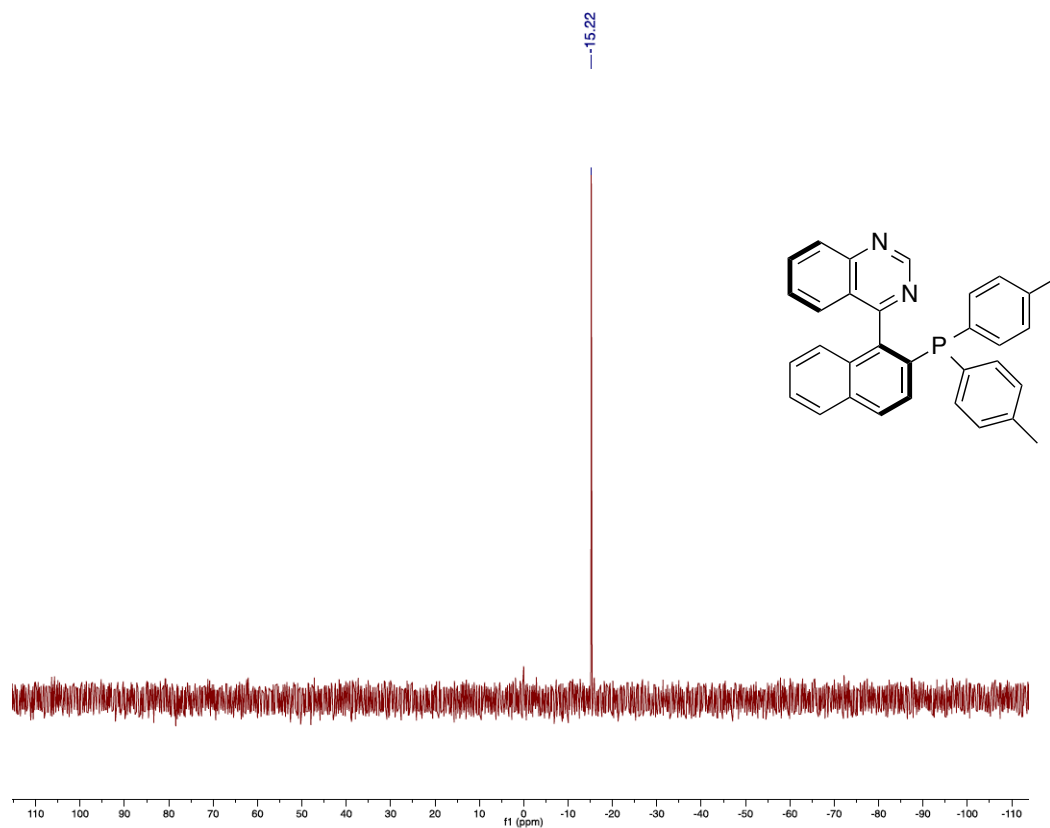

**Figure S81.**  $^{31}\text{P}$  NMR (161 MHz,  $\text{CDCl}_3$ ) of (S)-3Cc

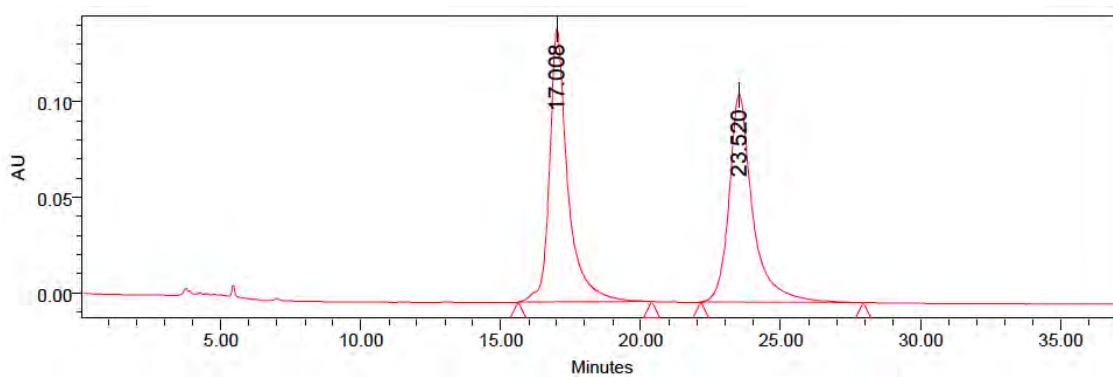

|   | Processed Channel | Retention Time (min) | Area    | % Area | Height |
|---|-------------------|----------------------|---------|--------|--------|
| 1 | PDA 229.7 nm      | 17.008               | 6508012 | 50.54  | 142553 |
| 2 | PDA 229.7 nm      | 23.520               | 6367723 | 49.46  | 108542 |

**Figure S82. Phosphine oxide racemic sample:** IA column, Hex:Isop 75:25, T= 30°C, F= 1mL/min.

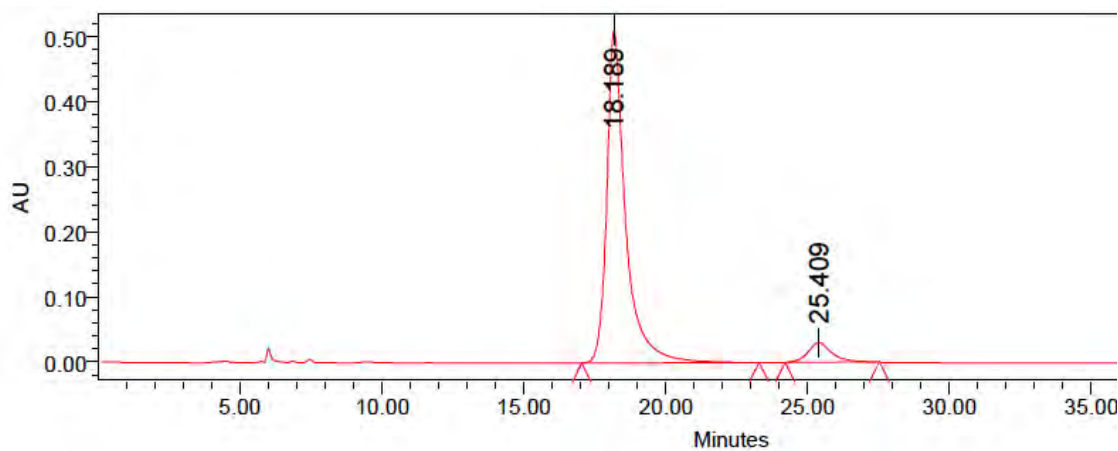

|   | Processed Channel | Retention Time (min) | Area     | % Area | Height |
|---|-------------------|----------------------|----------|--------|--------|
| 1 | PDA 229.7 nm      | 18.189               | 23495973 | 92.95  | 511713 |
| 2 | PDA 229.7 nm      | 25.409               | 1781334  | 7.05   | 30251  |

**Figure S83. Phosphine oxide enantioriched sample:** er 93:7.

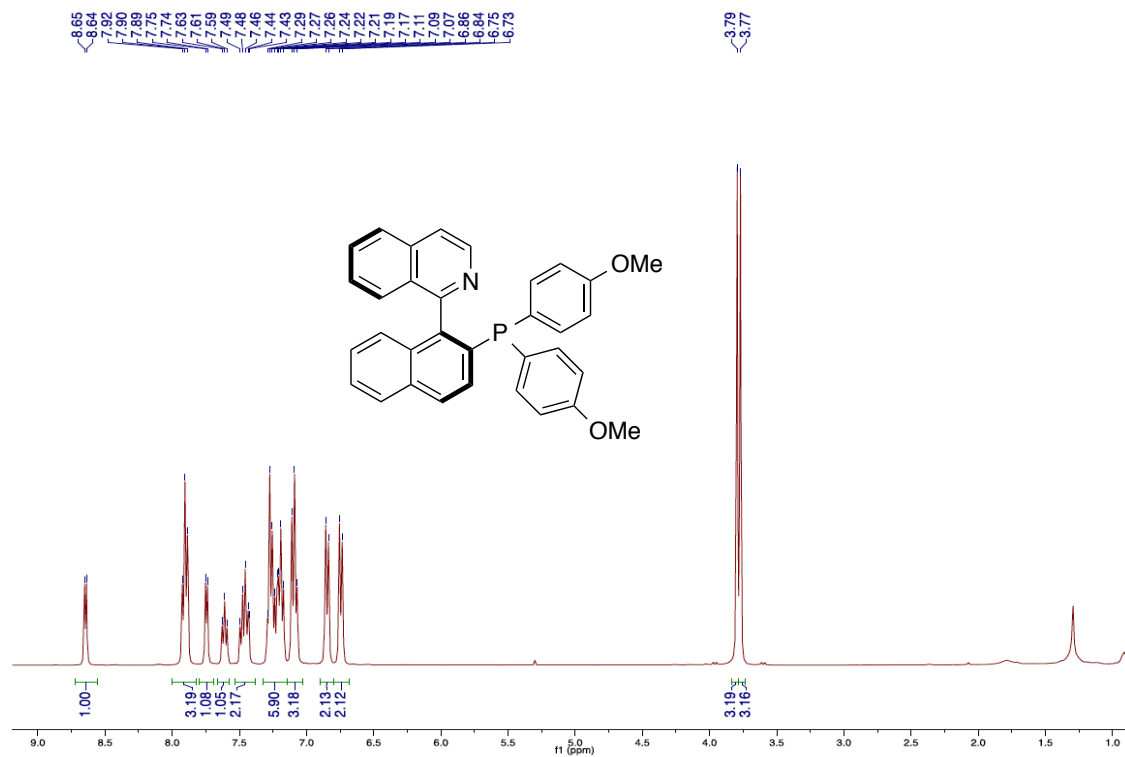

**Figure S84.** <sup>1</sup>H NMR (400 MHz, CDCl<sub>3</sub>) of (*S*)-3Ad

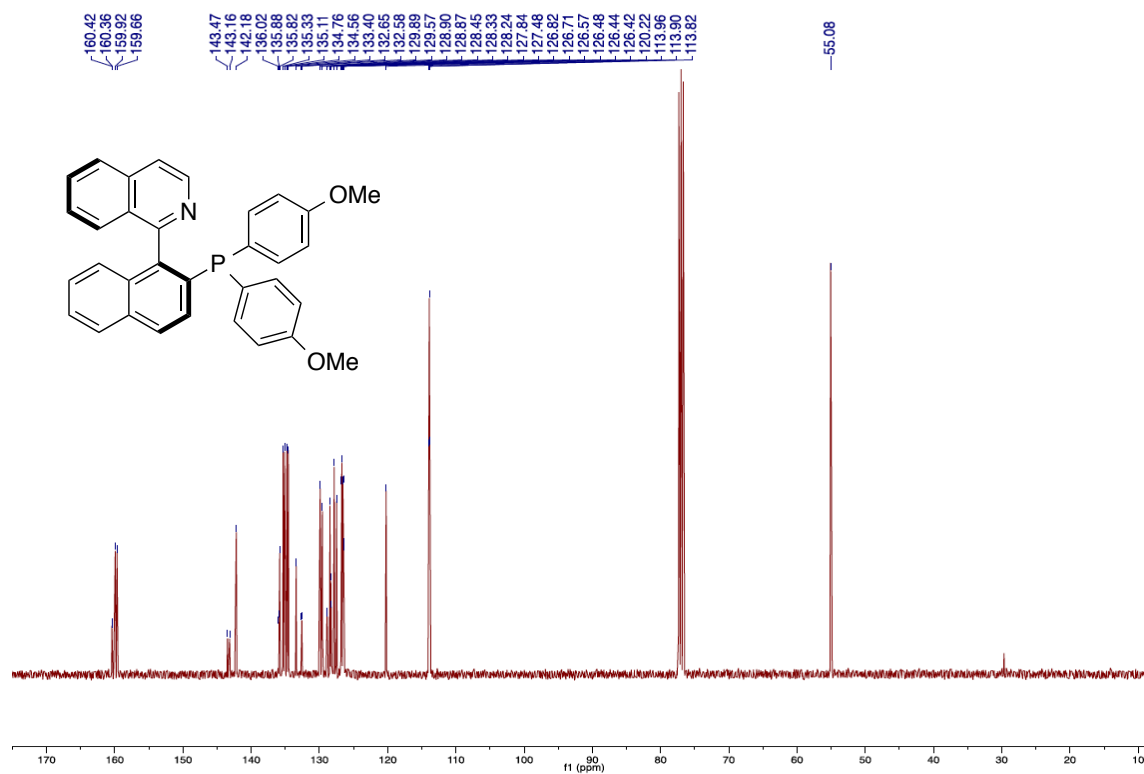

**Figure S85.** <sup>13</sup>C NMR (100 MHz, CDCl<sub>3</sub>) of (*S*)-3Ad

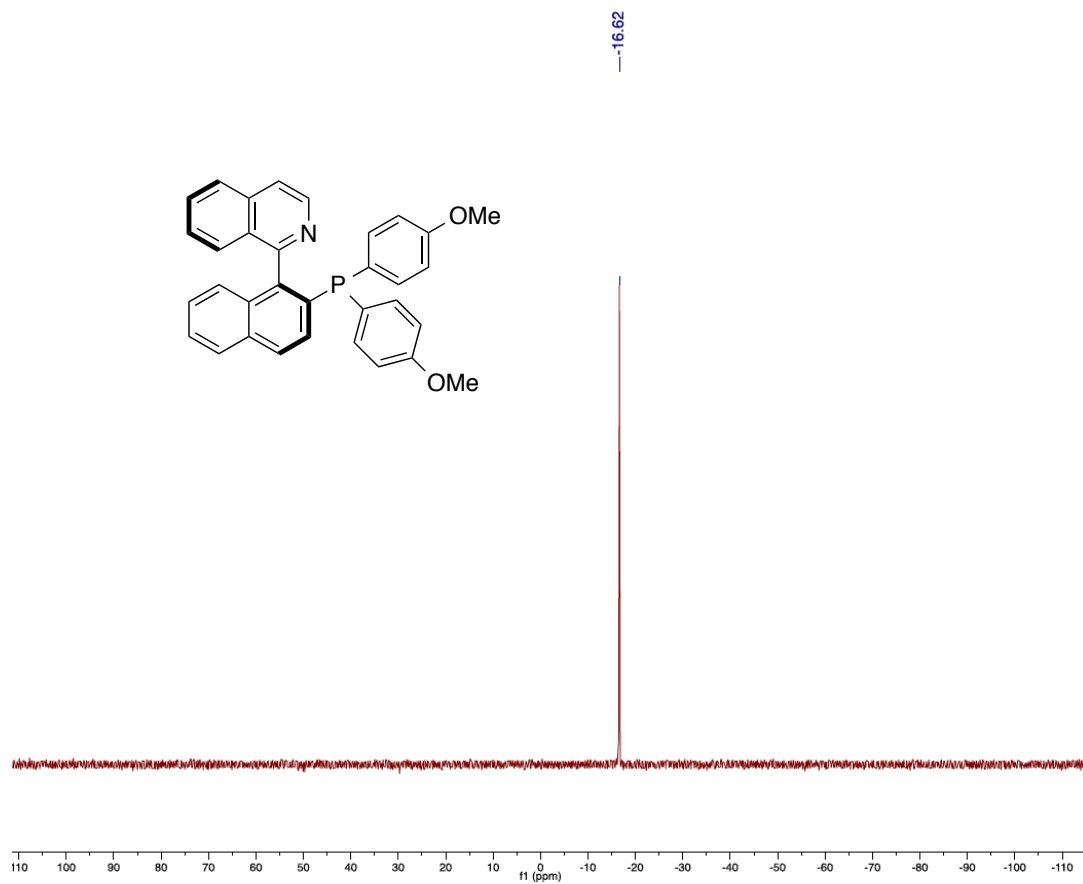

**Figure S86.**  $^{31}\text{P}$  NMR (161 MHz,  $\text{CDCl}_3$ ) of (S)-3Ad

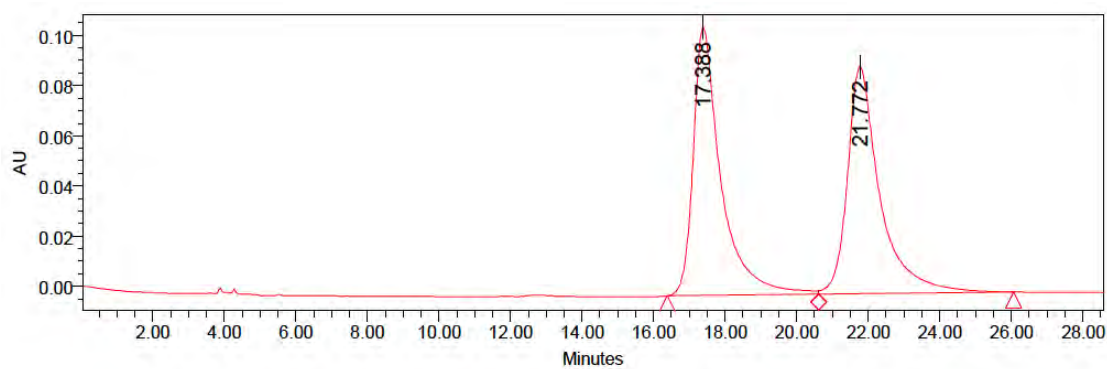

|   | Processed Channel | Retention Time (min) | Area    | % Area | Height |
|---|-------------------|----------------------|---------|--------|--------|
| 1 | PDA 229.0 nm      | 17.388               | 5762027 | 50.20  | 106780 |
| 2 | PDA 229.0 nm      | 21.772               | 5715941 | 49.80  | 90455  |

**Figure S87. Phosphine oxide racemic sample:** IA column, Hex:Isop 70:30, T= 30°C, F= 1mL/min.

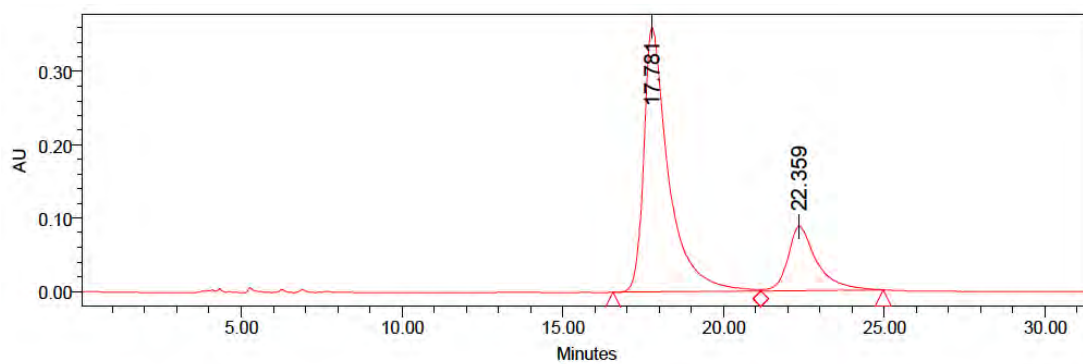

|   | Processed Channel | Retention Time (min) | Area     | % Area | Height |
|---|-------------------|----------------------|----------|--------|--------|
| 1 | PDA 229.0 nm      | 17.781               | 19452027 | 78.05  | 361366 |
| 2 | PDA 229.0 nm      | 22.359               | 5469834  | 21.95  | 87322  |

**Figure S88. Phosphine oxide enantioriched sample:** er 78:22.

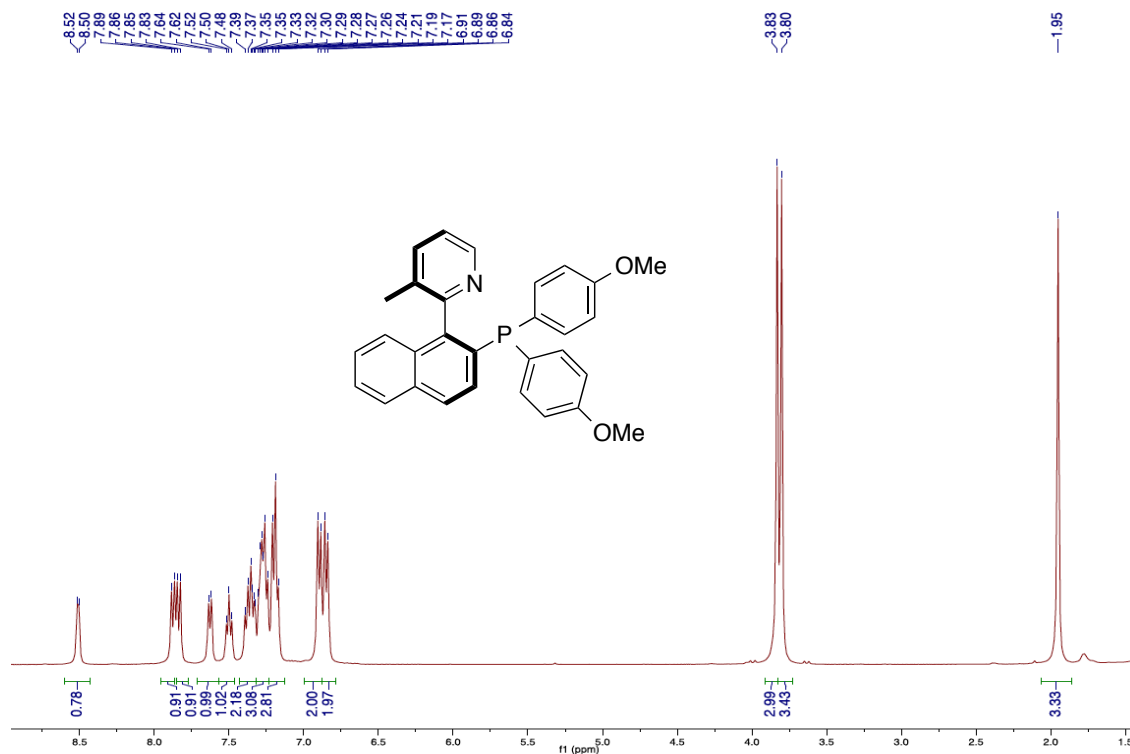

**Figure S89.** <sup>1</sup>H NMR (400 MHz, CDCl<sub>3</sub>) of (*S*)-3Bd

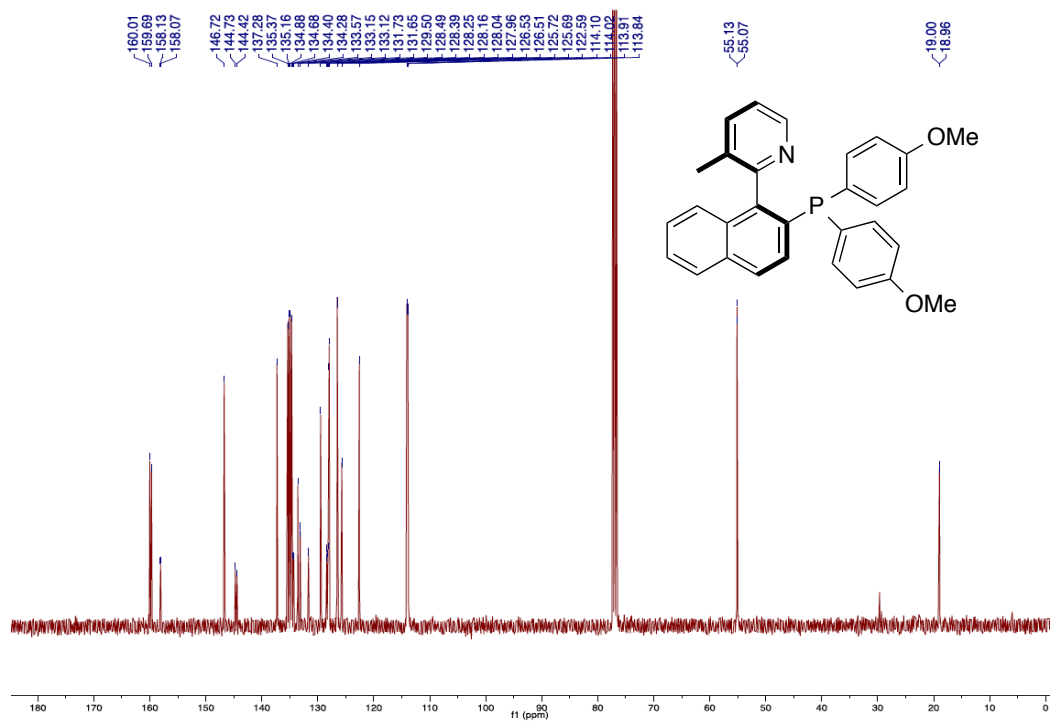

**Figure S90.** <sup>13</sup>C NMR (100 MHz, CDCl<sub>3</sub>) of (*S*)-3Bd

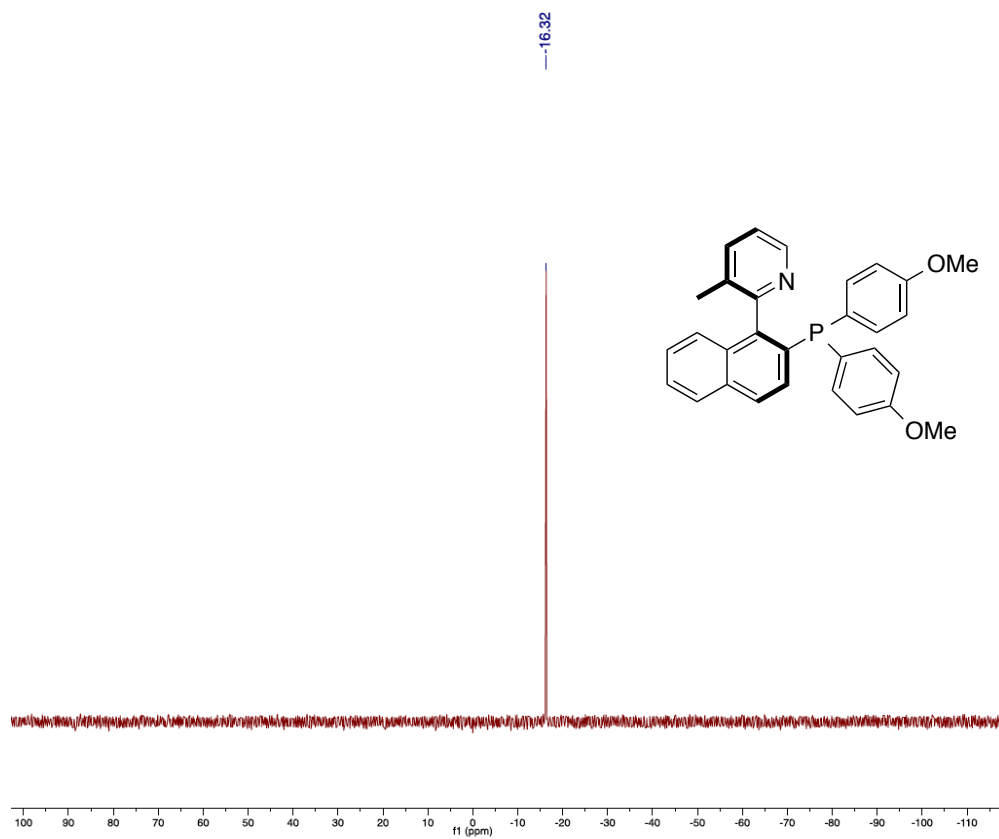

**Figure S91.**  $^{31}\text{P}$  NMR (161 MHz,  $\text{CDCl}_3$ ) of *(S)*-3Bd



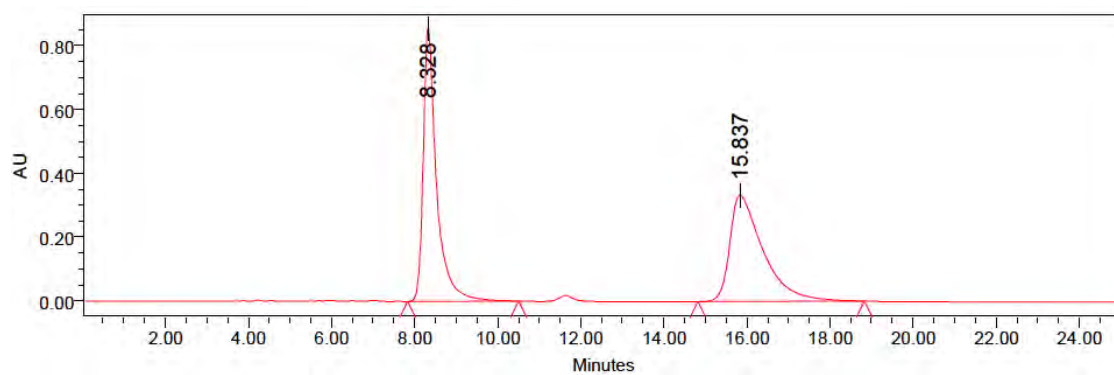

|   | Processed Channel | Retention Time (min) | Area     | % Area | Height |
|---|-------------------|----------------------|----------|--------|--------|
| 1 | PDA 238.0 nm      | 8.328                | 19028007 | 50.66  | 856237 |
| 2 | PDA 238.0 nm      | 15.837               | 18529928 | 49.34  | 332887 |

**Figure S92. Phosphine oxide racemic sample:** IA column, Hex:Isop 50:50, T= 30°C, F= 1mL/min.

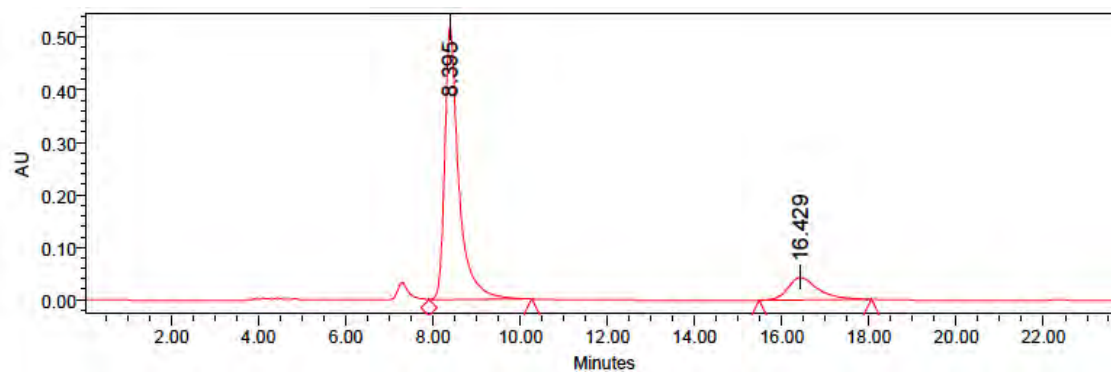

|   | Processed Channel | Retention Time (min) | Area     | % Area | Height |
|---|-------------------|----------------------|----------|--------|--------|
| 1 | PDA 238.0 nm      | 8.395                | 11594275 | 85.02  | 518637 |
| 2 | PDA 238.0 nm      | 16.429               | 2043144  | 14.98  | 42678  |

**Figure S93. Phosphine oxide enantioriched sample:** er 85:15.

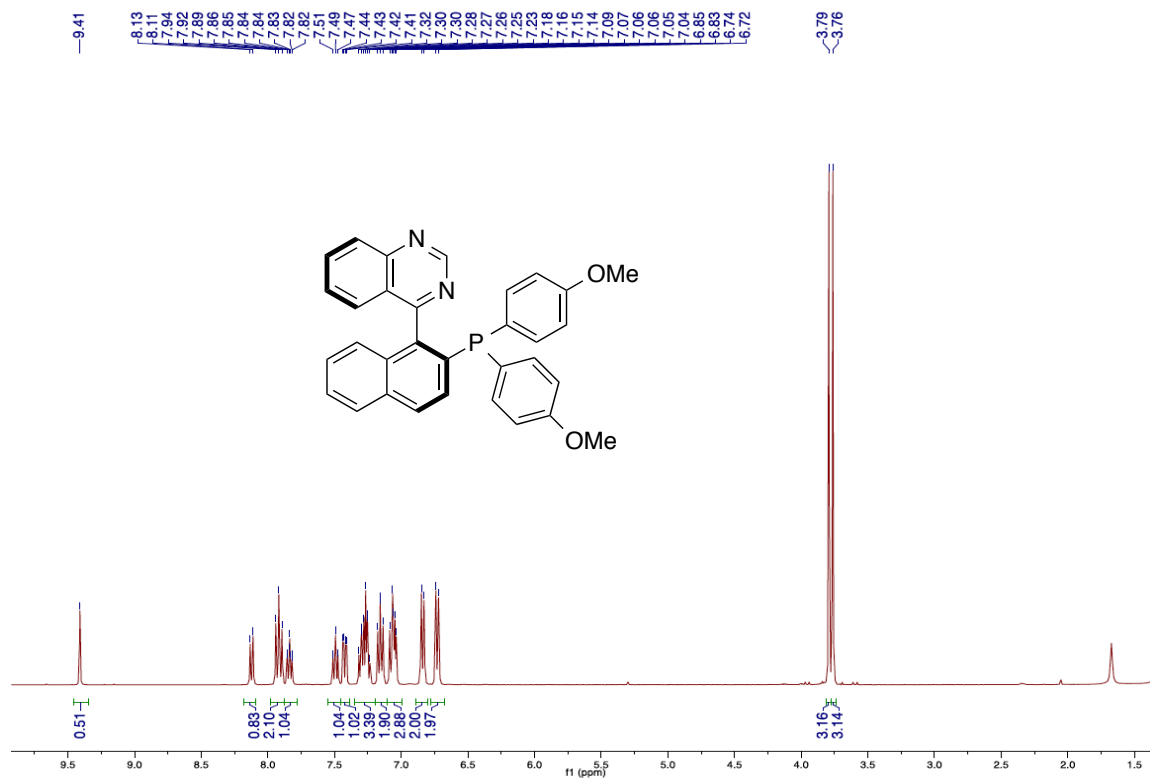

**Figure S94.** <sup>1</sup>H NMR (400 MHz, CDCl<sub>3</sub>) of (S)-3Cd

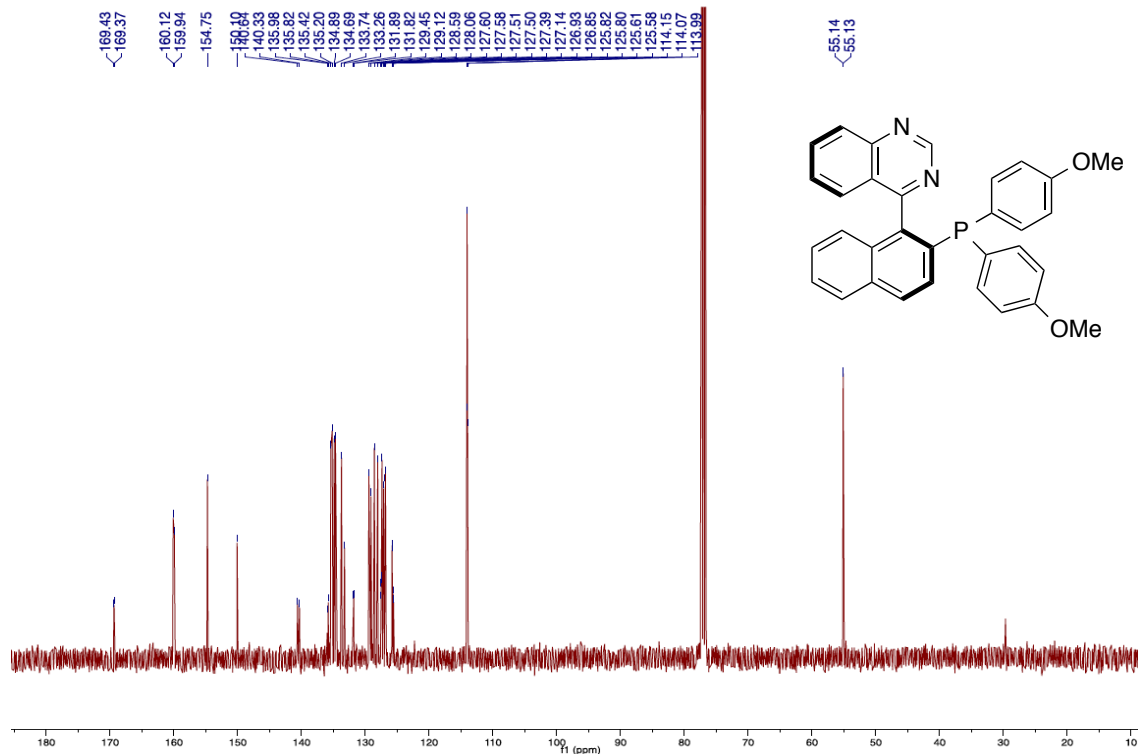

**Figure S95.** <sup>13</sup>C NMR (100 MHz, CDCl<sub>3</sub>) of (S)-3Cd

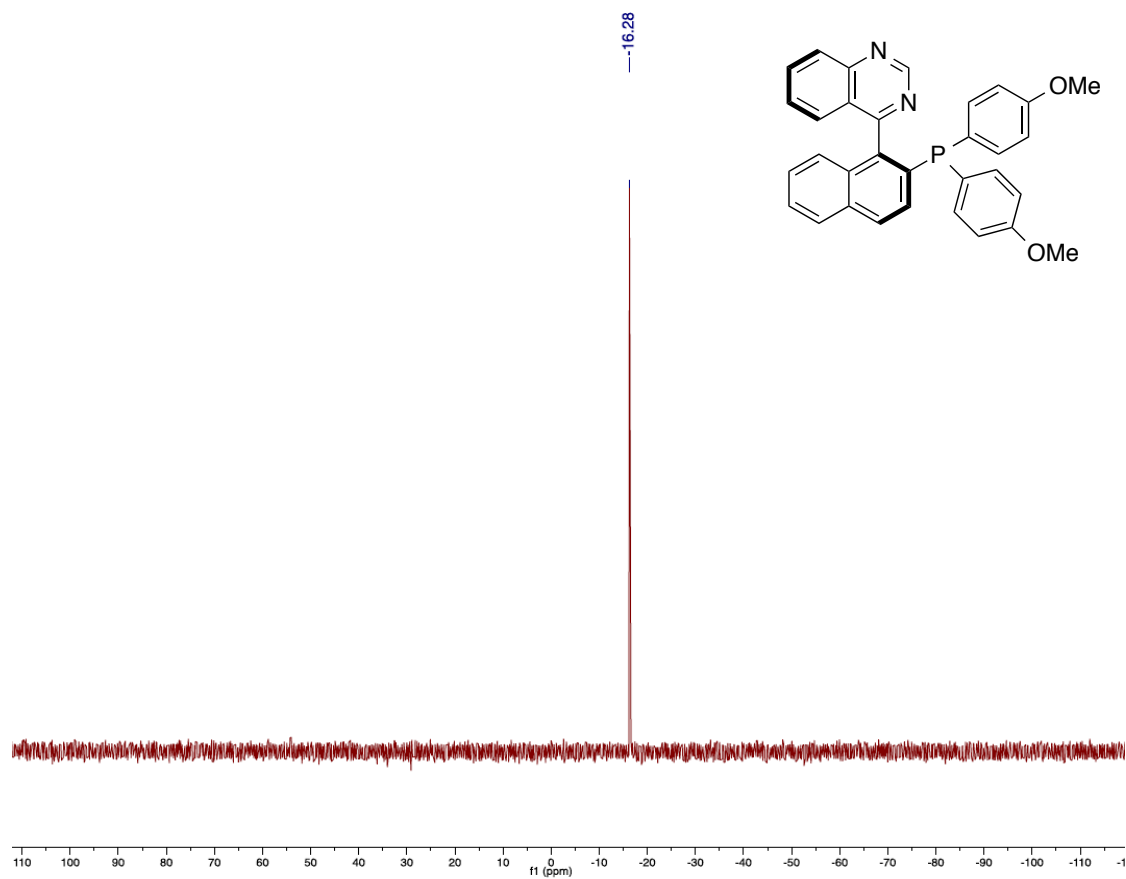

**Figure S96.**  $^{31}\text{P}$  NMR (161 MHz,  $\text{CDCl}_3$ ) of **(S)-3Cd**

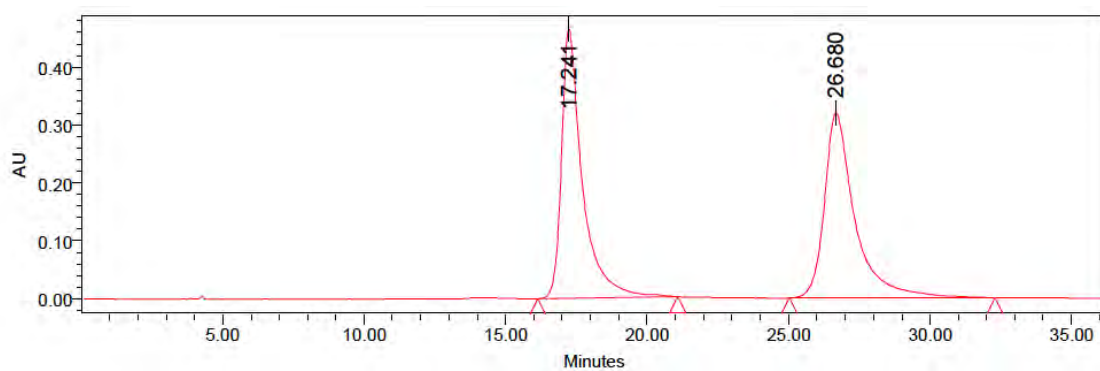

|   | Processed Channel | Retention Time (min) | Area     | % Area | Height |
|---|-------------------|----------------------|----------|--------|--------|
| 1 | PDA 229.0 nm      | 17.241               | 23808678 | 49.98  | 465123 |
| 2 | PDA 229.0 nm      | 26.680               | 23832362 | 50.02  | 319410 |

**Figure S97. Phosphine oxide racemic sample:** IA column, Hex:Isop 70:30, T= 30°C, F= 1mL/min.

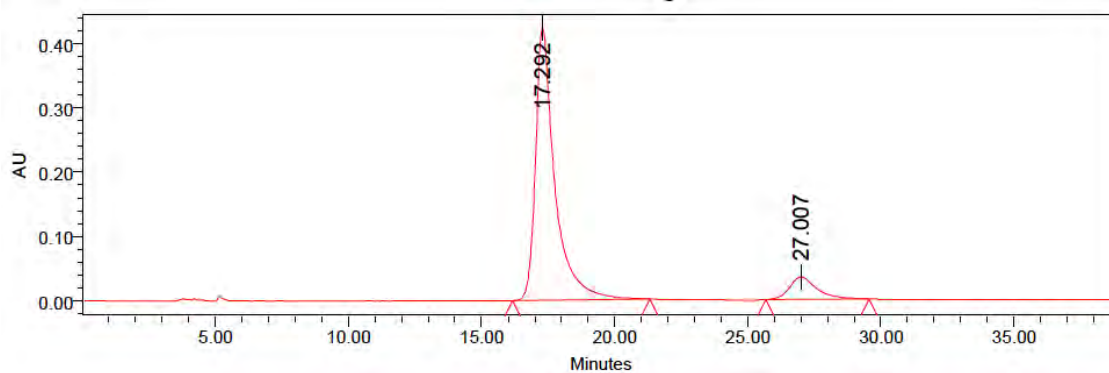

|   | Processed Channel | Retention Time (min) | Area     | % Area | Height |
|---|-------------------|----------------------|----------|--------|--------|
| 1 | PDA 229.0 nm      | 17.292               | 21425075 | 89.49  | 424651 |
| 2 | PDA 229.0 nm      | 27.007               | 2515103  | 10.51  | 35062  |

**Figure S98. Phosphine oxide enantioriched sample:** er 89.5:10.5.



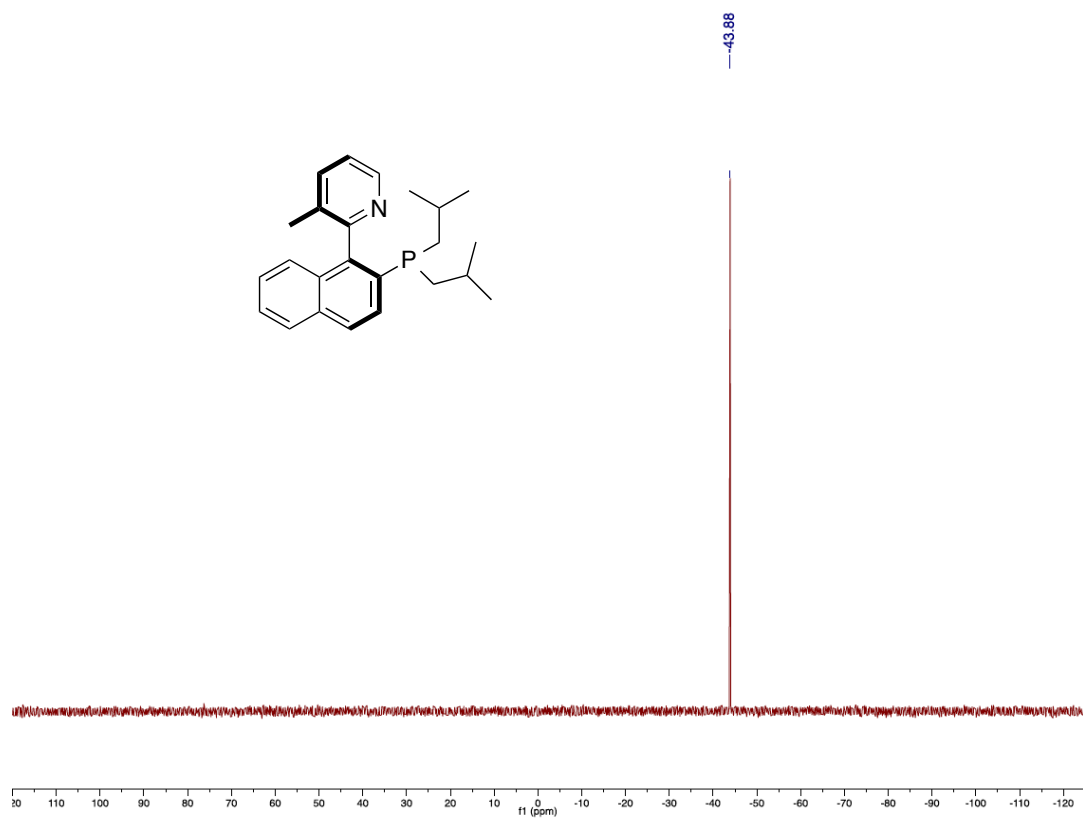

**Figure S101.**  $^{31}\text{P}$  NMR (161 MHz,  $\text{CDCl}_3$ ) of (*S*)-3Be

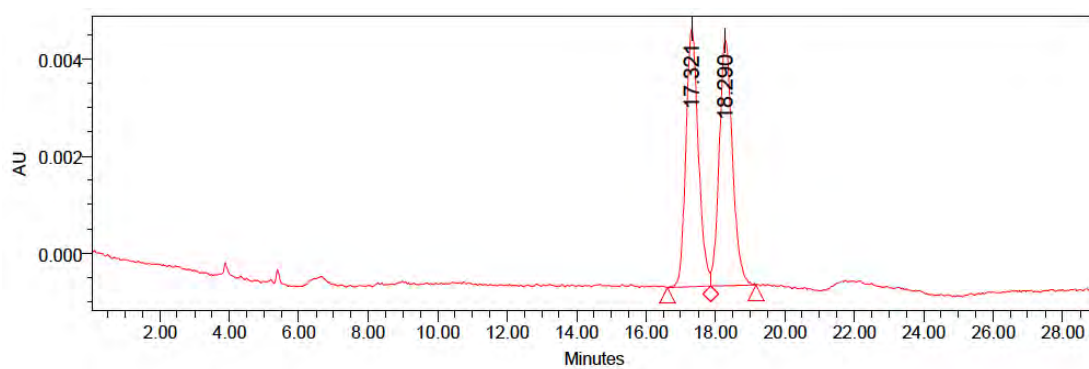

|   | Processed Channel | Retention Time (min) | Area   | % Area | Height |
|---|-------------------|----------------------|--------|--------|--------|
| 1 | PDA 271.9 nm      | 17.321               | 132813 | 49.83  | 5314   |
| 2 | PDA 271.9 nm      | 18.290               | 133736 | 50.17  | 5058   |

**Figure S102. Phosphine oxide racemic sample:** ADH column, Hex:Isop 95:5, T= 30°C, F= 1mL/min.

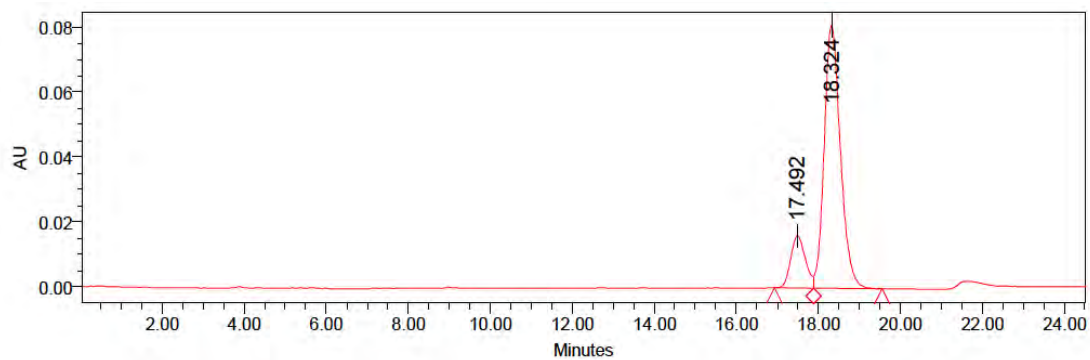

|   | Processed Channel | Retention Time (min) | Area    | % Area | Height |
|---|-------------------|----------------------|---------|--------|--------|
| 1 | PDA 271.9 nm      | 17.492               | 399179  | 15.24  | 16014  |
| 2 | PDA 271.9 nm      | 18.324               | 2219890 | 84.76  | 81084  |

**Figure S103. Phosphine oxide enantioriched sample:** er 15:85.

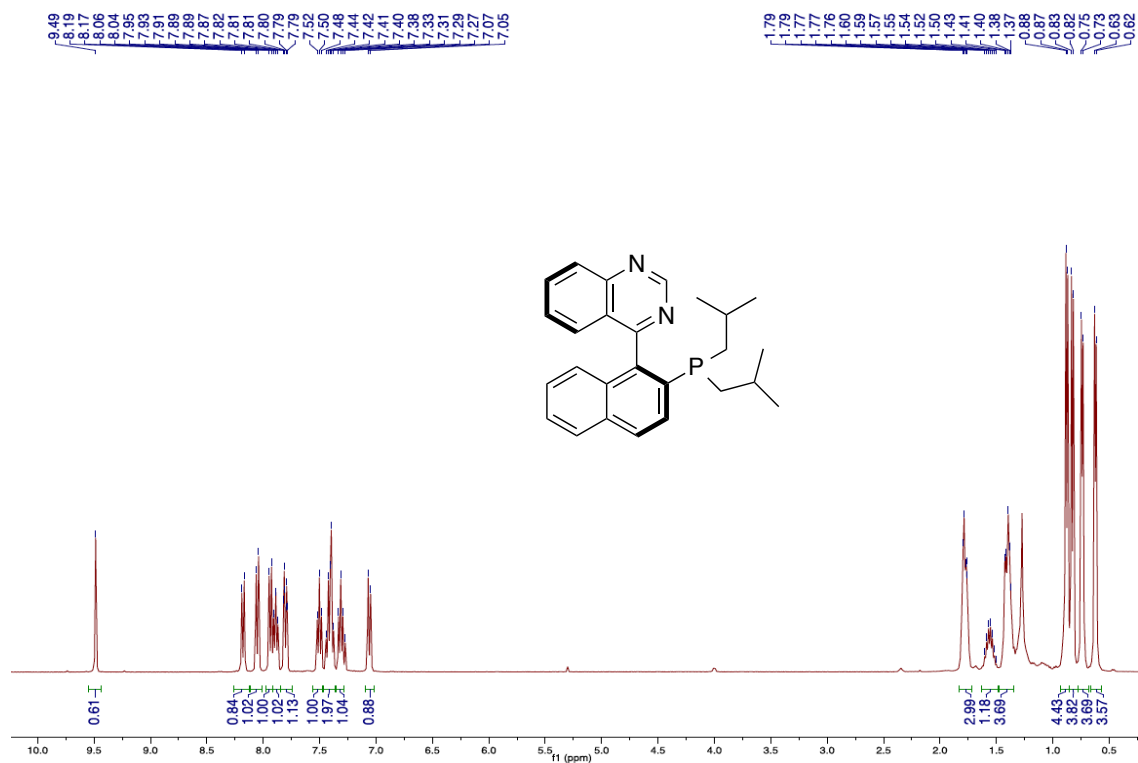

**Figure S104.** <sup>1</sup>H NMR (400 MHz, CDCl<sub>3</sub>) of (S)-3Ce

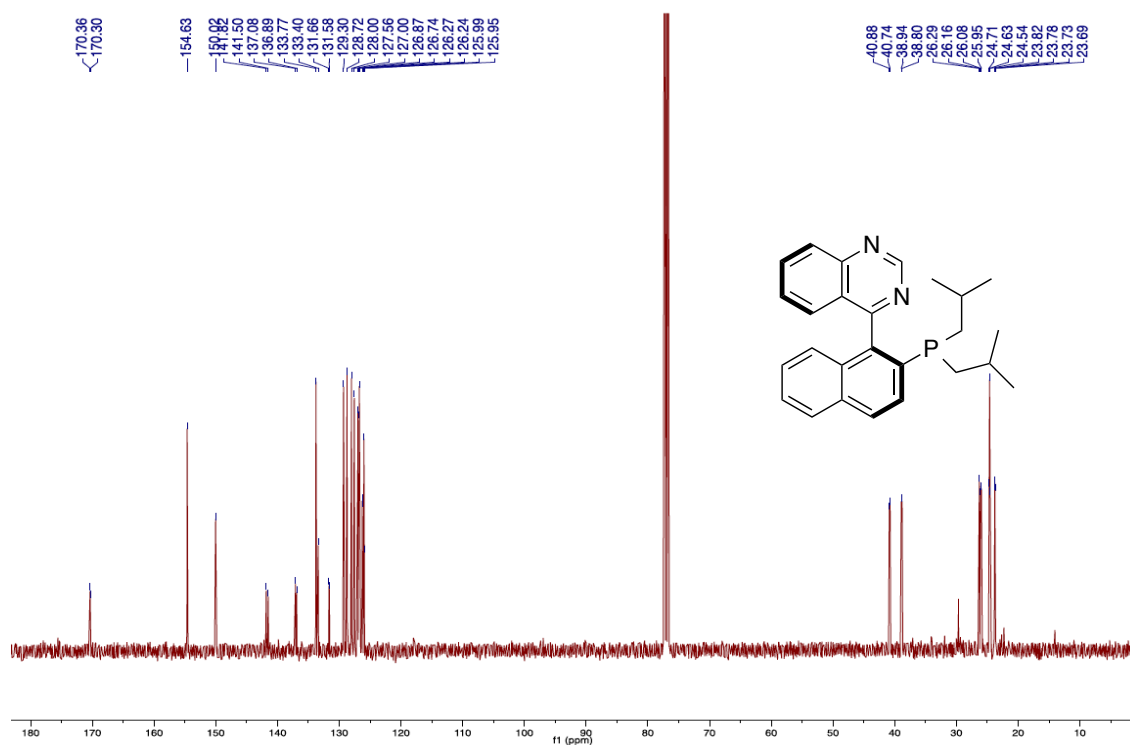

**Figure S105.** <sup>13</sup>C NMR (100 MHz, CDCl<sub>3</sub>) of (S)-3Ce



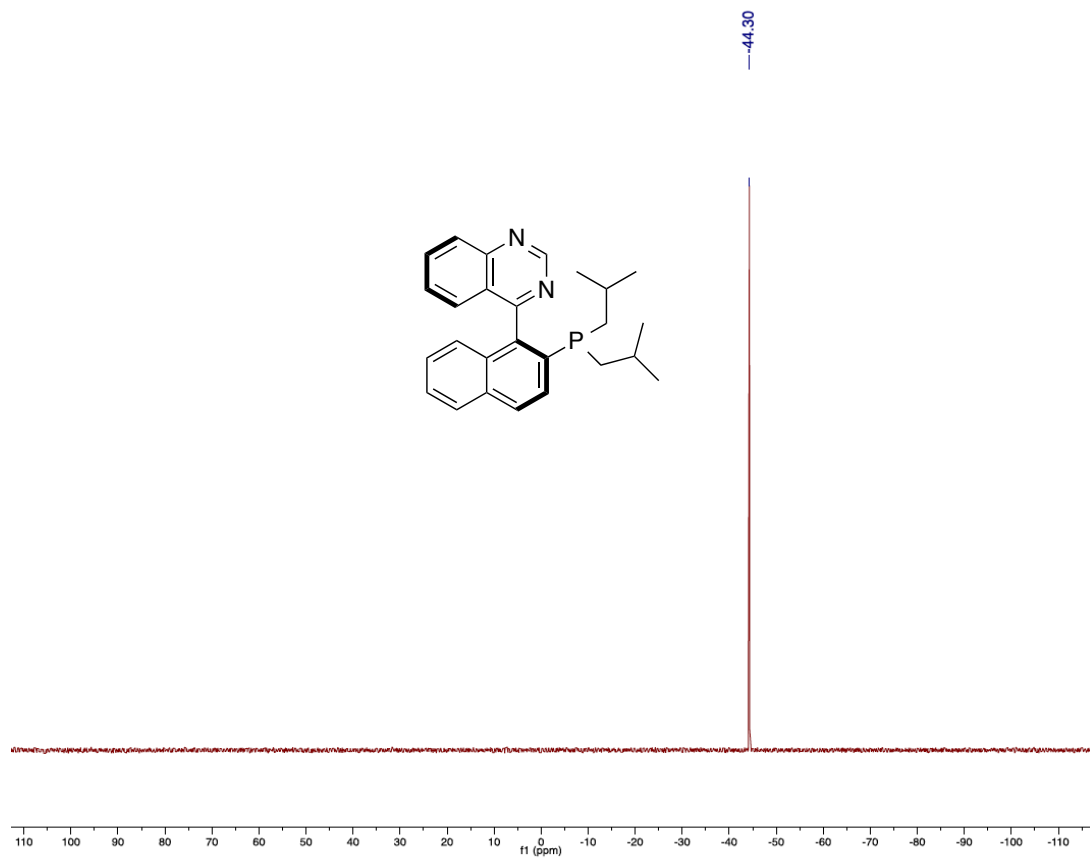

**Figure S106.**  $^{31}\text{P}$  NMR (161 MHz,  $\text{CDCl}_3$ ) of (S)-3Ce

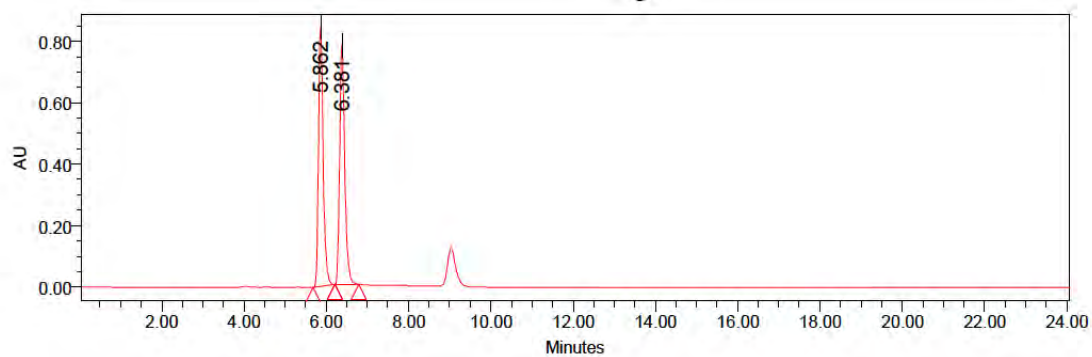

|   | Processed Channel | Retention Time (min) | Area    | % Area | Height |
|---|-------------------|----------------------|---------|--------|--------|
| 1 | PDA 225.0 nm      | 5.862                | 6595494 | 49.51  | 841443 |
| 2 | PDA 225.0 nm      | 6.381                | 6726011 | 50.49  | 783165 |

**Figure S107. Phosphine racemic sample:** ADH column, Hex:Isop 85:15, T= 30°C, F= 1mL/min.

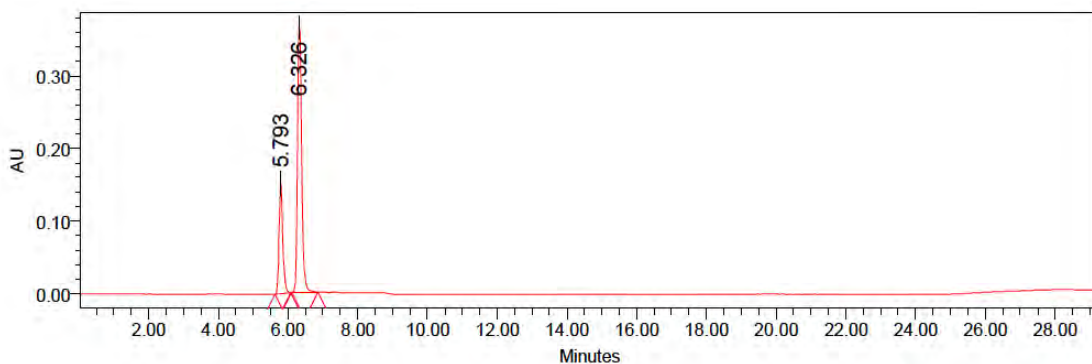

|   | Processed Channel | Retention Time (min) | Area    | % Area | Height |
|---|-------------------|----------------------|---------|--------|--------|
| 1 | PDA 225.0 nm      | 5.793                | 1132601 | 27.31  | 152813 |
| 2 | PDA 225.0 nm      | 6.326                | 3015055 | 72.69  | 367993 |

**Figure S108. Phosphine enantioriched sample:** er 27.5:72.5.

## References

1. Ros, A.; Estepa, B.; Bermejo, A.; Álvarez, E.; Fernández, R.; Lassaletta, J. M. *J. Org. Chem.* **2012**, *77*, 4740-4750.
2. Lassaletta, J. M.; Alcarazo, M.; Fernández, R. *Chem. Commun.* **2004**, 298-299.
3. Peer, M.; de Jong, J. C.; Kiefer, M.; Langer, T.; Rieck, H.; Schell, H.; Sennhenn, P.; Sprintz, J.; Steinhagen, H.; Wiese, B.; Helmchen, G. *Tetrahedron* **1996**, *52*, 7547-7583.
4. Alexakis, A.; Burton, J.; Vastra, J.; Benhaim, C.; Fournioux, X.; van den Heuvel, A.; Levêque, J.-M.; Mazeé, F.; Rosset, S. *Eur. J. Org. Chem.* **2000**, 4011-4027.
5. Lim, C. W.; Tissot, O.; Mattison, A.; Hooper, M. W.; Brown, J. M.; Cowley, A. R.; Hulmes, D. I.; Blacker, A. *J. Org. Process Res. Dev.*, **2003**, *7*, 379-384.
6. a) Connolly, D. J.; Lacey, P. M.; McCarthy, M.; Saunders, C. P.; Carroll, A-M.; Goddard, R.; Guiry, P. J. *J. Org. Chem.* **2004**, *69*, 6572-6589. b) Ros, A.; Estepa, B.; Ramírez López, P.; Álvarez, E.; Fernández, R.; Lassaletta, J. M. *J. Am. Chem. Soc.* **2013**, *135*, 15730-15733.
7. a) Hayashi, M.; Matsuura, Y.; Watanabe, Y. *Tetrahedron Lett.*, **2004**, *45*, 1409-1411. b) Trepohl, V. T.; Oestreich, M. *Chem. Commun.*, **2007**, 3300-3302.
8. Lukeman, M.; Simon, H.; Wan, P.; Wan, Y.-H. *J. Org. Chem.* **2015**, *80*, 11281-11293.
9. Zhu, S.; Wang, C.; Chen, L.; Liang, R.; Yu, Y.; Jiang, H. *Org. Lett.* **2011**, *13*, 1146-1149.
10. Shekhar, S.; Dunn, T. B.; Kotecki, B. J.; Montavon, D. K.; Cullen, S. C. *J. Org. Chem.* **2011**, *76*, 4552-4563.
11. Ma, G.; Deng, J.; Sibi, M. P. *Angew. Chem. Int. Ed.* **2014**, *53*, 11818-11821.
12. Commercially available phosphine (Aldrich, cat. Number 392073) showed to have a ~ 8% of HPPPh<sub>2</sub>.
13. Bhat, V.; Wang, S.; Stoltz, B. M.; Virgil, S. *J. Am. Chem. Soc.*, **2013**, *135*, 16829-16832.
